# Supplementary material for: Promoting axon regeneration by enhancing the non-coding function of the injury-responsive coding gene Gpr151
Source: Research Square preprint supplement (doi:10.21203/rs.3.rs-269886/v1), 2021-03-10
Supplement: Supplementary file 2 [file 4ff24bac2dbaeb3b686e96bf.xlsx]

## Sheet: S3_related_to_figure5D
	Description	-log10(Pvalue)	Color code
	protein localization	6.2549	Blue
	cellular protein localization	6.1931	Blue
	cellular macromolecule localization	6.1249	Blue
	intracellular transport	5.0448	Blue
	intracellular protein transport	4.6556	Blue
	protein transport	4.3288	Blue
	establishment of protein localization	4.2534	Blue
	protein targeting	1.2176	Blue
	chemical synaptic transmission	4.0926	Yellow
	synapse assembly	3.3726	Yellow
	cell morphogenesis	3.0737	Yellow
	neuron differentiation	2.9749	Yellow
	dendrite development	2.9168	Yellow
	cellular component morphogenesis	2.9132	Yellow
	neurotransmitter secretion	2.4002	Yellow
	regulation of neuron differentiation	2.3629	Yellow
	regulation of cell morphogenesis involved in differentiation	2.2809	Yellow
	neuron projection development	2.2105	Yellow
	neuron development	2.1247	Yellow
	cell part morphogenesis	1.9964	Yellow
	modulation of synaptic transmission	1.97	Yellow
	regulation of nervous system development	1.9444	Yellow
	regulation of neurogenesis	1.9434	Yellow
	cell projection morphogenesis	1.8622	Yellow
	regulation of neuron projection development	1.8311	Yellow
	synapse organization	1.7475	Yellow
	cell morphogenesis involved in differentiation	1.6827	Yellow
	regulation of cell morphogenesis	1.6289	Yellow
	axonogenesis	1.6276	Yellow
	regulation of axonogenesis	1.605	Yellow
	cell morphogenesis involved in neuron differentiation	1.5951	Yellow
	negative regulation of cell development	1.5621	Yellow
	cell projection assembly	1.5189	Yellow
	neuron projection morphogenesis	1.394	Yellow
	regulation of cell development	1.3817	Yellow
	regulation of synaptic plasticity	1.2667	Yellow
	negative regulation of neurogenesis	1.103	Yellow
	dendrite morphogenesis	1.0384	Yellow
	neuron recognition	1.0384	Yellow
	regulation of cytoskeleton organization	4.0867	Green
	cytoskeleton organization	3.767	Green
	regulation of organelle organization	3.475	Green
	microtubule-based movement	3.4225	Green
	intermediate filament-based process	3.2676	Green
	intermediate filament cytoskeleton organization	2.6851	Green
	transport along microtubule	2.1948	Green
	negative regulation of cellular component organization	2.1856	Green
	microtubule cytoskeleton organization	2.0883	Green
	axo-dendritic transport	1.9973	Green
	intermediate filament bundle assembly	1.9812	Green
	cytoskeleton-dependent intracellular transport	1.8989	Green
	intermediate filament organization	1.7862	Green
	regulation of microtubule cytoskeleton organization	1.7435	Green
	actin filament-based process	1.394	Green
	regulation of microtubule-based process	1.3685	Green
	regulation of actin cytoskeleton organization	1.3635	Green
	regulation of actin filament-based process	1.3339	Green
	actin cytoskeleton organization	1.2803	Green
	negative regulation of cytoskeleton organization	1.2667	Green
	neurofilament cytoskeleton organization	1.265	Green
	regulation of actin polymerization or depolymerization	1.204	Green
	regulation of actin filament length	1.1741	Green
	regulation of microtubule polymerization	1.0384	Green
	cell migration	1.0381	Green
	actin filament organization	1.0369	Green
	negative regulation of apoptotic process	1.5408	Red
	negative regulation of programmed cell death	1.4672	Red
	negative regulation of cell death	1.4537	Red
	regulation of programmed cell death	1.0568	Red
	regulation of cell death	1.0358	Red
	regulation of developmental growth	1.1371	Orange
	regulation of growth	1.0717	Orange
	learning or memory	2.834	Gray
	learning	1.4571	Gray
	multi-organism behavior	1.3728	Gray
	visual behavior	1.3728	Gray
	feeding behavior	1.1741	Gray
