# Supplementary material for: Promoting axon regeneration by enhancing the non-coding function of the injury-responsive coding gene Gpr151
Source: Research Square preprint supplement (doi:10.21203/rs.3.rs-269886/v1), 2021-03-10
Supplement: Supplementary file 2 [file f4d19984ac97c83498487c60.pdf]

# Supplementary Information for

Promoting axon regeneration by enhancing the non-coding function of the injury-responsive coding gene *Gpr151*

**Bohm Lee<sup>#1</sup>, Jinyoung Lee<sup>#1</sup>, Yewon Jeon<sup>#1</sup>, Hyemin Kim<sup>1</sup>, Minjae Kwon<sup>1</sup>, Jung Eun Shin<sup>1,2</sup>  
and Yongcheol Cho<sup>\*1</sup>**

<sup>1</sup> Department of Life Sciences, Korea University, Seoul 02841, Republic of Korea

<sup>2</sup> Department of Molecular Neuroscience, Dong-A University College of Medicine, Busan 49201,  
Republic of Korea

**This PDF file includes:**

Supplementary figure 1 to 4

**Supplementary Fig. 1.**

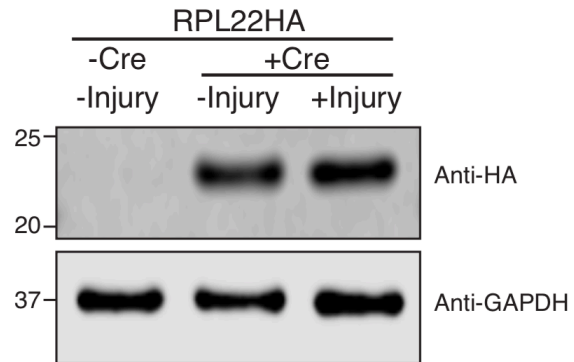

Western blot analysis of L4,L5 DRG tissues dissected from *RiboTag* x *Advillin*-Cre mice with (+Injury) or without (-Injury) sciatic nerve axotomy. Anti-HA epitope antibody was used to detect *Rpl22HA* protein, related to figure 1A.

Supplementary Fig. 2.

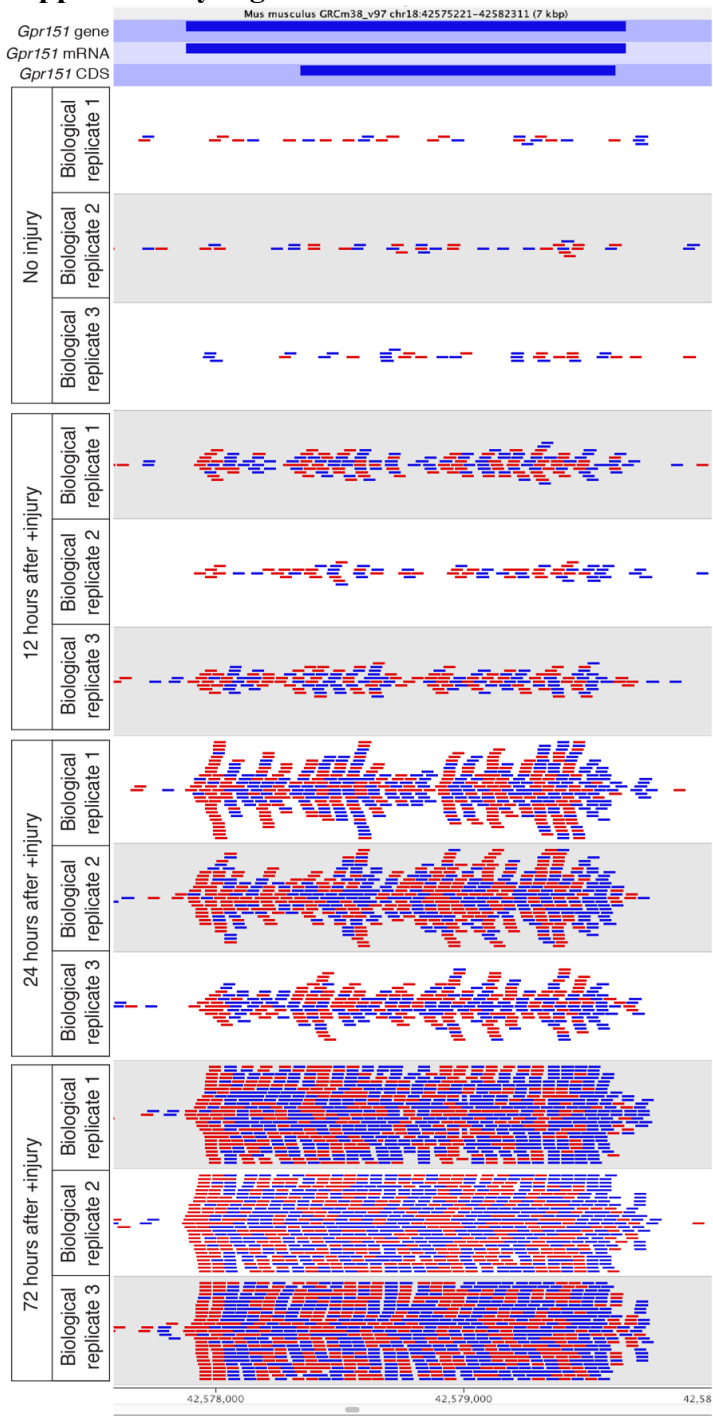

Visualization of the illumina sequencing results mapped with mouse *Gpr151* gene using SeqMonk.

### Supplementary Fig. 3.

**A**

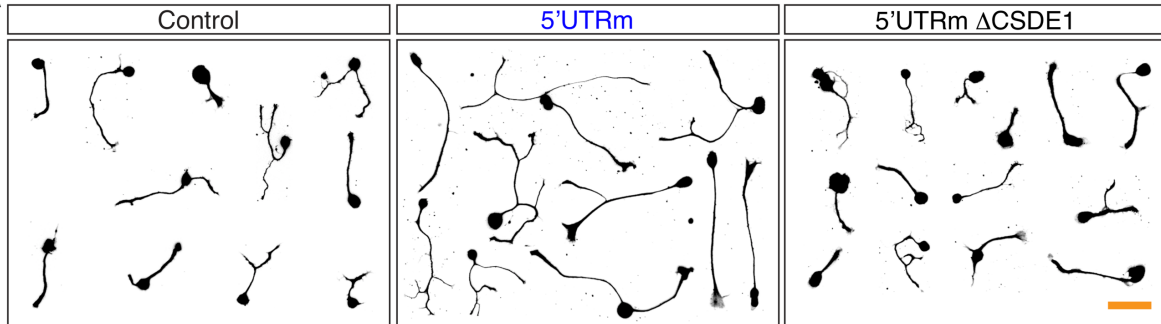

**B**

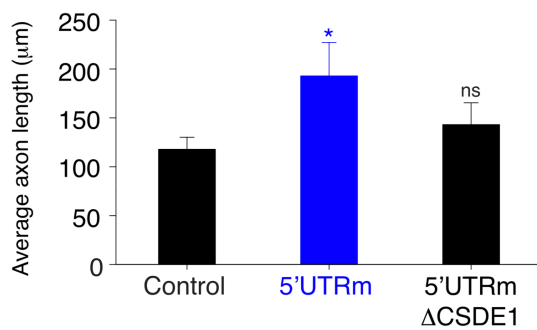

In vitro axon regeneration assay. (A) Representative images of control, 5'UTR<sub>m</sub>-overexpressing, and 5'UTR<sub>m</sub>ΔCSDE1-overexpressing embryonic DRG neurons. Scale bar, 100 μm. (B) Statistical analysis of regenerating axon length of (A) (n=254, 198, 167 for control, shCSDE1 and shKHDRBS1; \*\*\*p<0.001, ns, not significant by ANOVA followed by Tukey tests; mean±SEM). (B) Statistics of average of relative axon length of (A) (n=64, 55, 68 cells for control, 5'UTR<sub>m</sub>, 5'UTR<sub>m</sub>ΔCSDE1; \*p<0.05, ns, not significant by ANOVA followed by Tukey tests; mean±SEM).

Supplementary Fig. 4.

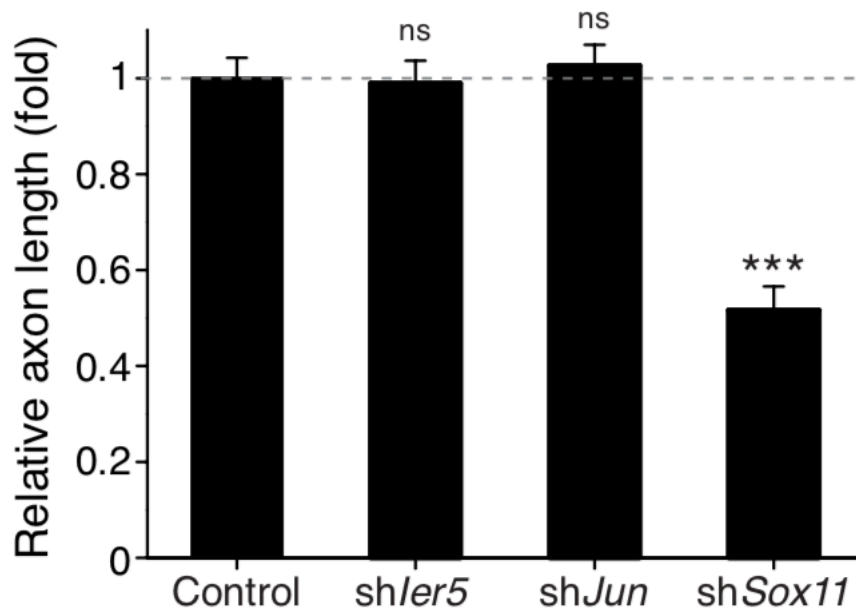

Statistical analysis of regenerating axon length of embryonic neurons of control, shIer5, shJun, shSox11 (n=156, 79, 78, 45 for each condition; \*\*\*p<0.001, ns, not significant by ANOVA followed by Tukey tests; mean±SEM), related to figure 7A.
