# Supplementary material for: Promoting axon regeneration by enhancing the non-coding function of the injury-responsive coding gene Gpr151
Source: Research Square preprint supplement (doi:10.21203/rs.3.rs-269886/v1), 2021-03-10
Supplement: Supplementary file 3 [file 5ba36e96c7ad56e066e55e51.xlsx]

## Sheet: S2_related_to_figure5C
				CSDE1-IP seq			Input		CSDE1-dissociation factor
no	ENSG	Gene_symbol	Length	IgG	Control	5'UTRm	Control	5'UTRm
3506	ENSMUSG00000022285	Ywhaz	26160	0	20	0	974	1081	4.39232
13661	ENSMUSG00000043004	Gng2	105069	0	16	0	246	206	4.08746
52796	ENSMUSG00000110469	Gm10358	1250	0	11	0	737	842	3.58496
10230	ENSMUSG00000037926	Ssh2	243934	0	11	0	734	786	3.58496
3127	ENSMUSG00000021270	Hsp90aa1	12124	0	11	0	725	776	3.58496
9777	ENSMUSG00000034593	Myo5a	152674	0	11	0	130	126	3.58496
1922	ENSMUSG00000014769	Psmb1	24731	0	10	0	371	340	3.45943
7763	ENSMUSG00000029064	Gnb1	67909	0	9	0	744	835	3.32193
4483	ENSMUSG00000025959	Klf7	92836	0	9	0	138	139	3.32193
4392	ENSMUSG00000022816	Fstl1	59642	0	27	2	725	909	3.22239
1491	ENSMUSG00000008348	Ubc	4238	0	8	0	1326	1523	3.16993
4535	ENSMUSG00000024501	Dpysl3	117303	0	68	7	1004	1051	3.10852
12225	ENSMUSG00000039114	Nrn1	9771	0	16	1	468	533	3.08746
8920	ENSMUSG00000032076	Cadm1	327465	0	16	1	125	135	3.08746
9489	ENSMUSG00000034158	Lrrc58	20470	0	40	4	210	174	3.03562
3864	ENSMUSG00000022752	Tomm70a	35003	0	7	0	128	146	3
12238	ENSMUSG00000038872	Zfhx3	1018987	0	7	0	15	17	3
4936	ENSMUSG00000024462	Gabbr1	29102	0	7	0	203	226	3
15803	ENSMUSG00000051391	Ywhag	26208	0	7	0	679	741	3
9409	ENSMUSG00000032518	Rpsa	4681	0	7	0	1182	1284	3
19387	ENSMUSG00000062991	Nrg1	1069479	0	7	0	488	530	3
6648	ENSMUSG00000028081	Rps3a1	4763	0	7	0	250	265	3
8467	ENSMUSG00000031509	1700016D06Rik	46140	0	7	0	465	486	3
2326	ENSMUSG00000019370	Calm3	8736	0	7	0	795	769	3
10513	ENSMUSG00000037996	Slc24a2	247354	0	7	0	82	69	3
11812	ENSMUSG00000039542	Ncam1	296790	0	15	1	123	133	3
2994	ENSMUSG00000021420	Fars2	608869	0	14	1	159	162	2.90689
11406	ENSMUSG00000040537	Adam22	295809	0	6	0	65	74	2.80735
6262	ENSMUSG00000028073	Pear1	76417	0	6	0	438	492	2.80735
9420	ENSMUSG00000033847	Pla2g4c	36018	0	6	0	392	437	2.80735
5876	ENSMUSG00000028072	Ntrk1	16919	0	6	0	431	475	2.80735
186	ENSMUSG00000001175	Calm1	10380	0	6	0	1019	1103	2.80735
10312	ENSMUSG00000037852	Cpe	100513	0	6	0	426	445	2.80735
15291	ENSMUSG00000054387	Mdm4	71078	0	6	0	303	316	2.80735
4956	ENSMUSG00000025234	Arih1	98361	0	6	0	460	462	2.80735
2975	ENSMUSG00000021379	Id4	4799	0	6	0	370	369	2.80735
6475	ENSMUSG00000027438	Napb	38483	0	6	0	92	91	2.80735
539	ENSMUSG00000003429	Rps11	2061	0	6	0	640	631	2.80735
14273	ENSMUSG00000047126	Cltc	63215	0	6	0	216	209	2.80735
16456	ENSMUSG00000062661	Ncs1	50167	0	6	0	190	183	2.80735
13990	ENSMUSG00000047907	Tshz2	438804	0	6	0	66	56	2.80735
16134	ENSMUSG00000057666	Gapdh	4753	0	6	0	81	65	2.80735
22375	ENSMUSG00000079502	Cfap77	128118	0	12	1	2035	2293	2.70044
10402	ENSMUSG00000036591	Arhgap21	120963	0	18	2	98	106	2.66297
7070	ENSMUSG00000029580	Actb	3640	0	139	22	1604	1717	2.60572
15688	ENSMUSG00000053510	Nrd1	61123	0	5	0	32	51	2.58496
9167	ENSMUSG00000034683	Ppp1r1c	110717	0	5	0	263	364	2.58496
22000	ENSMUSG00000069769	Msi2	379132	0	5	0	17	22	2.58496
17623	ENSMUSG00000063015	Ccni	24563	0	5	0	253	297	2.58496
14974	ENSMUSG00000056851	Pcbp2	29523	0	5	0	355	411	2.58496
2392	ENSMUSG00000020368	Canx	31713	0	5	0	333	385	2.58496
9486	ENSMUSG00000032564	Cpne4	487259	0	5	0	140	160	2.58496
9100	ENSMUSG00000034488	Edil3	501752	0	5	0	220	251	2.58496
1167	ENSMUSG00000019966	Kitl	84787	0	5	0	441	487	2.58496
22175	ENSMUSG00000079523	Tmsb10	1402	0	5	0	2444	2616	2.58496
4943	ENSMUSG00000025151	Maged1	6670	0	5	0	328	351	2.58496
10891	ENSMUSG00000036438	Calm2	13524	0	5	0	1363	1447	2.58496
7001	ENSMUSG00000029578	Wipi2	42891	0	5	0	53	56	2.58496
6260	ENSMUSG00000026601	Axdnd1	97651	0	5	0	749	791	2.58496
9669	ENSMUSG00000034832	Tet3	96712	0	5	0	36	38	2.58496
3755	ENSMUSG00000022193	Psmb5	3904	0	5	0	326	344	2.58496
21435	ENSMUSG00000078193	Gm2000	445	0	5	0	748	786	2.58496
7423	ENSMUSG00000029291	Rufy3	86353	0	5	0	217	228	2.58496
17223	ENSMUSG00000062997	Rpl35	4045	0	5	0	605	629	2.58496
9790	ENSMUSG00000035295	Wdr38	8693	0	5	0	612	633	2.58496
135	ENSMUSG00000000686	Abhd15	23487	0	5	0	60	61	2.58496
3133	ENSMUSG00000021816	Ppp3cb	47210	0	5	0	171	173	2.58496
27292	ENSMUSG00000068923	Syt11	30465	0	5	0	208	208	2.58496
12513	ENSMUSG00000045763	Basp1	50488	0	5	0	1022	1019	2.58496
1786	ENSMUSG00000015961	Adss	33550	0	5	0	73	70	2.58496
13697	ENSMUSG00000045038	Prkce	490135	0	5	0	104	95	2.58496
18166	ENSMUSG00000067336	Bmpr2	115615	0	5	0	114	102	2.58496
4021	ENSMUSG00000024044	Epb41l3	214307	0	5	0	160	142	2.58496
6504	ENSMUSG00000027663	Zmat3	31223	0	5	0	120	103	2.58496
11395	ENSMUSG00000039126	Prune2	267815	0	5	0	78	65	2.58496
8222	ENSMUSG00000031285	Dcx	77470	0	5	0	141	115	2.58496
4822	ENSMUSG00000025607	Copg2	149241	0	5	0	116	70	2.58496
4334	ENSMUSG00000023944	Hsp90ab1	5497	0	16	2	1335	1401	2.5025
2649	ENSMUSG00000020315	Sptbn1	168781	0	16	2	301	287	2.5025
16898	ENSMUSG00000062380	Tubb3	10592	0	33	5	1666	1765	2.5025
8759	ENSMUSG00000031865	Dctn1	34198	0	10	1	239	253	2.45943
556	ENSMUSG00000003410	Elavl3	37019	0	10	1	89	84	2.45943
48485	ENSMUSG00000107104	Nrxn2	125439	0	10	1	176	151	2.45943
9597	ENSMUSG00000033768	Nrxn2	125439	0	10	1	177	151	2.45943
5922	ENSMUSG00000026576	Atp1b1	21247	0	15	2	654	617	2.41504
6831	ENSMUSG00000029673	Auts2	1106012	0	4	0	52	81	2.32193
13856	ENSMUSG00000044072	Eml6	282986	0	4	0	12	18	2.32193
13516	ENSMUSG00000042978	Sbk1	22398	0	4	0	111	154	2.32193
9153	ENSMUSG00000032512	Wdr48	31710	0	4	0	24	33	2.32193
12035	ENSMUSG00000040118	Cacna2d1	439821	0	4	0	105	143	2.32193
3708	ENSMUSG00000022353	Mtss1	140772	0	4	0	15	20	2.32193
5658	ENSMUSG00000026883	Dab2ip	172729	0	4	0	57	75	2.32193
16128	ENSMUSG00000054263	Lifr	106876	0	4	0	132	172	2.32193
8987	ENSMUSG00000032423	Syncrip	35566	0	4	0	63	81	2.32193
12614	ENSMUSG00000049336	Tenm2	1229309	0	4	0	14	18	2.32193
7641	ENSMUSG00000029131	Dnajb6	82447	0	4	0	149	183	2.32193
12150	ENSMUSG00000039630	Hnrnpu	16690	0	4	0	150	182	2.32193
43359	ENSMUSG00000111145	Hnrnpu	16690	0	4	0	150	182	2.32193
15624	ENSMUSG00000052336	Cx3cr1	168264	0	4	0	44	53	2.32193
35271	ENSMUSG00000096370	Gm21992	68700	0	4	0	141	167	2.32193
6800	ENSMUSG00000030016	Zfp638	122442	0	4	0	1194	1407	2.32193
3644	ENSMUSG00000024211	Grm8	860060	0	4	0	25	29	2.32193
19142	ENSMUSG00000060938	Rpl26	5407	0	4	0	580	667	2.32193
14173	ENSMUSG00000049751	Rpl36al	1353	0	4	0	231	264	2.32193
18522	ENSMUSG00000068373	D430041D05Rik	267941	0	4	0	85	97	2.32193
4286	ENSMUSG00000023050	Map3k12	19419	0	4	0	74	83	2.32193
6851	ENSMUSG00000029120	Ppp2r2c	86566	0	4	0	155	172	2.32193
8245	ENSMUSG00000032186	Tmod2	45705	0	4	0	148	162	2.32193
17184	ENSMUSG00000062604	Srpk2	181354	0	4	0	44	48	2.32193
1534	ENSMUSG00000019998	Stx7	40921	0	4	0	171	186	2.32193
8470	ENSMUSG00000031278	Acsl4	72543	0	4	0	69	75	2.32193
8623	ENSMUSG00000031333	Abcb7	133200	0	4	0	234	254	2.32193
3582	ENSMUSG00000023064	Sncg	4516	0	4	0	1166	1263	2.32193
11094	ENSMUSG00000035864	Syt1	513333	0	4	0	128	138	2.32193
8925	ENSMUSG00000031996	Aplp2	62259	0	4	0	301	321	2.32193
23253	ENSMUSG00000071644	Eef1g	11439	0	4	0	648	690	2.32193
15821	ENSMUSG00000052949	Rnf157	76680	0	4	0	442	460	2.32193
13333	ENSMUSG00000047940	Stpg2	504606	0	4	0	896	931	2.32193
9783	ENSMUSG00000032513	Gorasp1	12309	0	4	0	26	27	2.32193
1652	ENSMUSG00000012848	Rps5	4397	0	4	0	604	624	2.32193
19221	ENSMUSG00000059796	Eif4a1	5488	0	4	0	582	591	2.32193
12864	ENSMUSG00000042616	Oscp1	33631	0	4	0	575	582	2.32193
11052	ENSMUSG00000036766	Dner	326383	0	4	0	186	188	2.32193
3800	ENSMUSG00000022783	Spag6l	76441	0	4	0	706	713	2.32193
4649	ENSMUSG00000025977	Boll	114812	0	4	0	852	860	2.32193
11930	ENSMUSG00000038696	Mapkap1	218180	0	4	0	580	584	2.32193
12350	ENSMUSG00000039001	Rps21	1069	0	4	0	562	562	2.32193
25562	ENSMUSG00000071072	Ptges3	18319	0	4	0	194	191	2.32193
8752	ENSMUSG00000031284	Pak3	279206	0	4	0	49	48	2.32193
14497	ENSMUSG00000047786	Lix1	56716	0	4	0	288	281	2.32193
40489	ENSMUSG00000103125	Gm37388	857356	0	4	0	166	161	2.32193
17273	ENSMUSG00000059291	Rpl11	25164	0	4	0	555	535	2.32193
16147	ENSMUSG00000057098	Ebf1	390775	0	4	0	55	53	2.32193
14775	ENSMUSG00000055069	Rab39	22123	0	4	0	651	621	2.32193
9630	ENSMUSG00000033713	Foxn3	373505	0	4	0	18	17	2.32193
7927	ENSMUSG00000032228	Tcf12	269184	0	4	0	497	467	2.32193
16802	ENSMUSG00000061751	Kalrn	604460	0	4	0	758	708	2.32193
8076	ENSMUSG00000030465	Psd3	522946	0	4	0	93	86	2.32193
11532	ENSMUSG00000039953	Clstn1	62432	0	4	0	163	150	2.32193
907	ENSMUSG00000006273	Atp6v1b2	25066	0	4	0	238	218	2.32193
1498	ENSMUSG00000018547	Pip4k2b	29548	0	4	0	107	98	2.32193
852	ENSMUSG00000004980	Hnrnpa2b1	8963	0	4	0	171	156	2.32193
10151	ENSMUSG00000035770	Dync1li2	25368	0	4	0	121	110	2.32193
9947	ENSMUSG00000035150	Eif2s3x	24156	0	4	0	194	176	2.32193
6472	ENSMUSG00000027596	a	259611	0	4	0	247	224	2.32193
1788	ENSMUSG00000010406	Mrpl52	2848	0	4	0	89	80	2.32193
13280	ENSMUSG00000049184	Purg	31143	0	4	0	45	40	2.32193
11540	ENSMUSG00000039960	Rhou	9956	0	4	0	145	128	2.32193
2775	ENSMUSG00000020181	Nav3	774946	0	4	0	41	36	2.32193
3901	ENSMUSG00000024213	Nudt3	44114	0	4	0	152	125	2.32193
1331	ENSMUSG00000015536	Mocs2	14040	0	4	0	54	40	2.32193
3865	ENSMUSG00000023832	Acat2	17858	0	4	0	197	138	2.32193
9967	ENSMUSG00000032740	Ccdc88a	137151	0	4	0	44	24	2.32193
4885	ENSMUSG00000024639	Gnaq	254633	0	9	1	2445	2623	2.32193
15091	ENSMUSG00000055022	Cntn1	290803	0	9	1	361	372	2.32193
4108	ENSMUSG00000023484	Prph	3805	0	18	3	2428	2516	2.24793
9102	ENSMUSG00000032826	Ank2	577739	0	13	2	220	207	2.22239
2492	ENSMUSG00000020458	Rtn4	51385	0	8	1	354	398	2.16993
685	ENSMUSG00000006740	Kif5b	41173	0	8	1	67	73	2.16993
5403	ENSMUSG00000025613	Cct8	12548	0	8	1	370	333	2.16993
4367	ENSMUSG00000022197	Pdzd2	380214	0	12	2	1745	2015	2.11548
29609	ENSMUSG00000092329	Gm20388	4434882	0	53	12	6750	7124	2.05445
525	ENSMUSG00000002028	Kmt2a	77942	0	3	0	5	16	2
4993	ENSMUSG00000025810	Nrp1	144760	0	3	0	52	91	2
6061	ENSMUSG00000027479	Mapre1	32037	0	3	0	140	206	2
14267	ENSMUSG00000049122	Frmd3	188773	0	3	0	111	153	2
8093	ENSMUSG00000031441	Atp11a	111715	0	3	0	33	45	2
13695	ENSMUSG00000047388	Atmin	17053	0	3	0	22	30	2
19286	ENSMUSG00000064345	mt-Nd2	1038	0	3	0	1546	2032	2
11112	ENSMUSG00000035585	Tsen34	8162	0	3	0	88	115	2
2814	ENSMUSG00000021756	Il6st	46017	0	3	0	78	101	2
2586	ENSMUSG00000020668	Kif3c	41363	0	3	0	87	112	2
1577	ENSMUSG00000018548	Trim37	93607	0	3	0	68	86	2
1649	ENSMUSG00000014592	Camta1	944555	0	3	0	80	100	2
9992	ENSMUSG00000034647	Ankrd12	111392	0	3	0	26	32	2
16011	ENSMUSG00000053774	Ubxn7	61491	0	3	0	13	16	2
17604	ENSMUSG00000062859	Tcp11	13895	0	3	0	83	102	2
10322	ENSMUSG00000037236	Matr3	31698	0	3	0	115	141	2
8550	ENSMUSG00000031065	Cdk16	11927	0	3	0	145	177	2
6497	ENSMUSG00000027770	Dhx36	38992	0	3	0	32	39	2
16131	ENSMUSG00000056413	Adap1	53747	0	3	0	116	141	2
8957	ENSMUSG00000033949	Trim36	47308	0	3	0	274	333	2
673	ENSMUSG00000005873	Reep5	29186	0	3	0	527	640	2
11323	ENSMUSG00000039419	Cntnap2	2244857	0	3	0	100	121	2
4412	ENSMUSG00000022474	Pmm1	9823	0	3	0	222	267	2
12688	ENSMUSG00000043673	Kcns3	60855	0	3	0	294	352	2
4721	ENSMUSG00000025352	Gdf11	9424	0	3	0	56	67	2
8711	ENSMUSG00000030432	Rpl28	2193	0	3	0	375	446	2
2428	ENSMUSG00000021820	Camk2g	59214	0	3	0	115	136	2
3689	ENSMUSG00000022708	Zbtb20	766722	0	3	0	244	287	2
3389	ENSMUSG00000020841	Cpd	68595	0	3	0	40	47	2
16240	ENSMUSG00000055013	Agap1	442812	0	3	0	42	49	2
3275	ENSMUSG00000020496	Rnf187	6629	0	3	0	453	527	2
2361	ENSMUSG00000021840	Mapk1ip1l	24939	0	3	0	33	38	2
3692	ENSMUSG00000022208	Jph4	10110	0	3	0	154	177	2
2168	ENSMUSG00000009863	Sdhb	17991	0	3	0	310	356	2
6050	ENSMUSG00000027828	Ssr3	12969	0	3	0	102	116	2
8646	ENSMUSG00000032096	Arcn1	26282	0	3	0	101	114	2
6978	ENSMUSG00000030306	Tmtc1	211960	0	3	0	79	89	2
46843	ENSMUSG00000115960	Ulbp1	33277	0	3	0	506	569	2
7687	ENSMUSG00000028565	Nfia	346141	0	3	0	16	18	2
3837	ENSMUSG00000022024	Sugt1	47506	0	3	0	106	119	2
8485	ENSMUSG00000031209	Heph	119127	0	3	0	699	782	2
2053	ENSMUSG00000017404	Rpl19	3783	0	3	0	615	687	2
15394	ENSMUSG00000054423	Cadps	450517	0	3	0	113	125	2
25262	ENSMUSG00000079685	Ulbp1	33277	0	3	0	511	562	2
4400	ENSMUSG00000023284	Zfp605	19703	0	3	0	316	347	2
6427	ENSMUSG00000027288	Zfp106	57024	0	3	0	21	23	2
30964	ENSMUSG00000102805	Gm37240	1391093	0	3	0	149	163	2
8840	ENSMUSG00000031010	Usp9x	101831	0	3	0	102	110	2
3907	ENSMUSG00000022400	Rbx1	10074	0	3	0	241	259	2
16307	ENSMUSG00000052477	C130026I21Rik	277877	0	3	0	842	902	2
2669	ENSMUSG00000021687	Scamp1	84548	0	3	0	85	91	2
9429	ENSMUSG00000032939	Nup93	102664	0	3	0	682	730	2
189	ENSMUSG00000001120	Pcbp3	200031	0	3	0	404	432	2
18045	ENSMUSG00000058558	Rpl5	8504	0	3	0	438	468	2
8792	ENSMUSG00000030835	Nomo1	50515	0	3	0	105	112	2
303	ENSMUSG00000001472	Tcf25	30083	0	3	0	307	327	2
1356	ENSMUSG00000019505	Ubb	2043	0	3	0	2726	2897	2
6965	ENSMUSG00000029004	Kmt2e	69795	0	3	0	16	17	2
31031	ENSMUSG00000102758	Naaladl2	1346160	0	3	0	678	719	2
4565	ENSMUSG00000025228	Actr1a	18938	0	3	0	217	230	2
855	ENSMUSG00000006699	Cdc42	38025	0	3	0	468	496	2
2440	ENSMUSG00000021981	Cab39l	144793	0	3	0	34	36	2
5680	ENSMUSG00000026987	Baz2b	310477	0	3	0	17	18	2
39405	ENSMUSG00000090137	Uba52	2539	0	3	0	1097	1158	2
4196	ENSMUSG00000022841	Ap2m1	9432	0	3	0	779	818	2
17732	ENSMUSG00000068240	Gm11808	504	0	3	0	1379	1446	2
15755	ENSMUSG00000055553	Kxd1	19685	0	3	0	1068	1117	2
11387	ENSMUSG00000039480	Nt5dc1	130265	0	3	0	203	212	2
1166	ENSMUSG00000015932	Dstn	28005	0	3	0	386	403	2
6850	ENSMUSG00000030058	Copg1	25782	0	3	0	137	143	2
12132	ENSMUSG00000041225	Arhgap12	111672	0	3	0	24	25	2
13540	ENSMUSG00000042079	Hnrnpf	25299	0	3	0	101	105	2
1768	ENSMUSG00000015291	Gdi1	6865	0	3	0	363	376	2
8850	ENSMUSG00000032231	Anxa2	38176	0	3	0	1004	1039	2
7555	ENSMUSG00000029121	Crmp1	50194	0	3	0	362	374	2
3629	ENSMUSG00000022263	Trio	295198	0	3	0	33	34	2
15432	ENSMUSG00000053025	Sv2b	194369	0	3	0	69	71	2
4485	ENSMUSG00000026311	Asb1	19046	0	3	0	60	61	2
14899	ENSMUSG00000052133	Sema5b	123588	0	3	0	485	491	2
2101	ENSMUSG00000018965	Ywhah	9151	0	3	0	1100	1110	2
5832	ENSMUSG00000026833	Olfm1	37745	0	3	0	899	906	2
692	ENSMUSG00000006057	Atp5g1	6819	0	3	0	583	587	2
17664	ENSMUSG00000063229	Ldha	14153	0	3	0	516	517	2
7526	ENSMUSG00000028495	Rps6	2753	0	3	0	533	533	2
3364	ENSMUSG00000021520	Uqcrb	4762	0	3	0	243	243	2
15998	ENSMUSG00000051223	Bzw1	14456	0	3	0	164	164	2
5881	ENSMUSG00000028156	Eif4e	33518	0	3	0	74	74	2
44451	ENSMUSG00000117694	Gm28285	34305	0	3	0	19	19	2
847	ENSMUSG00000006782	Cnp	16826	0	3	0	68	68	2
16034	ENSMUSG00000050332	Amer1	24555	0	3	0	8	8	2
7105	ENSMUSG00000028926	Cdk14	616922	0	3	0	79	78	2
2523	ENSMUSG00000021640	Naip1	45106	0	3	0	353	347	2
7653	ENSMUSG00000029407	Uso1	64861	0	3	0	766	750	2
873	ENSMUSG00000005656	Snx6	49355	0	3	0	94	92	2
2164	ENSMUSG00000019775	Rgs17	96738	0	3	0	46	45	2
4537	ENSMUSG00000025537	Phkg1	35129	0	3	0	851	832	2
10157	ENSMUSG00000036745	Ttll7	131643	0	3	0	163	159	2
19233	ENSMUSG00000063632	Sox11	8311	0	3	0	38	37	2
22124	ENSMUSG00000070493	Chchd2	6315	0	3	0	850	826	2
11652	ENSMUSG00000039262	Prrc2b	83456	0	3	0	122	118	2
12384	ENSMUSG00000040479	Dgkz	43041	0	3	0	228	220	2
2488	ENSMUSG00000020647	Ncoa1	229821	0	3	0	192	185	2
5723	ENSMUSG00000027805	Pfn2	6185	0	3	0	431	414	2
7958	ENSMUSG00000031529	Tnks	139231	0	3	0	50	48	2
10652	ENSMUSG00000036617	Etl4	900934	0	3	0	148	142	2
17849	ENSMUSG00000062202	Btbd9	360965	0	3	0	614	589	2
8658	ENSMUSG00000032336	Nptn	75716	0	3	0	236	226	2
8509	ENSMUSG00000030744	Rps3	5843	0	3	0	769	736	2
32199	ENSMUSG00000087141	Plcxd2	50956	0	3	0	92	85	2
4800	ENSMUSG00000025658	Cnksr2	221859	0	3	0	13	12	2
5915	ENSMUSG00000028344	Invs	152195	0	3	0	85	78	2
6444	ENSMUSG00000027823	Gmps	46474	0	3	0	54	49	2
18629	ENSMUSG00000060988	Galnt13	681993	0	3	0	66	59	2
10324	ENSMUSG00000035614	Togaram1	56770	0	3	0	27	24	2
1204	ENSMUSG00000010505	Myt1	64466	0	3	0	36	32	2
14320	ENSMUSG00000044308	Ubr3	126768	0	3	0	81	72	2
1661	ENSMUSG00000009070	Rsph14	75110	0	3	0	75	66	2
12242	ENSMUSG00000040009	Gnaz	49731	0	3	0	75	66	2
3595	ENSMUSG00000022698	Naa50	23537	0	3	0	47	41	2
11439	ENSMUSG00000040016	Ptger3	78997	0	3	0	53	46	2
2090	ENSMUSG00000014195	Dnajc7	37351	0	3	0	114	98	2
2262	ENSMUSG00000017221	Psmd3	13426	0	3	0	77	65	2
4504	ENSMUSG00000025203	Scd2	13191	0	3	0	569	479	2
12440	ENSMUSG00000046865	Fbl	9560	0	3	0	50	42	2
3633	ENSMUSG00000024002	Brd4	88449	0	3	0	31	26	2
8307	ENSMUSG00000032290	Ptpn9	67885	0	3	0	78	65	2
8233	ENSMUSG00000032187	Smarca4	88062	0	3	0	57	47	2
5015	ENSMUSG00000024740	Ddb1	24493	0	3	0	203	167	2
6221	ENSMUSG00000027248	Pdia3	24913	0	3	0	173	142	2
2469	ENSMUSG00000021910	Nisch	46017	0	3	0	156	126	2
12557	ENSMUSG00000044647	Csrnp3	185780	0	3	0	50	40	2
13273	ENSMUSG00000041852	Tcf20	179437	0	3	0	14	11	2
5399	ENSMUSG00000025326	Ube3a	82787	0	3	0	59	46	2
1321	ENSMUSG00000008575	Nfib	415578	0	3	0	21	16	2
2466	ENSMUSG00000021745	Ptprg	688510	0	3	0	61	45	2
1404	ENSMUSG00000018379	Srsf1	6383	0	3	0	93	64	2
28599	ENSMUSG00000098301	Srsf1	6383	0	3	0	93	64	2
14798	ENSMUSG00000051335	Gfod1	108928	0	3	0	72	45	2
9193	ENSMUSG00000033943	Mga	72354	0	3	0	12	3	2
3291	ENSMUSG00000020661	Dnmt3a	108437	0	7	1	37	49	2
18942	ENSMUSG00000064351	mt-Co1	1545	0	7	1	15195	19034	2
23701	ENSMUSG00000071866	Ppia	4375	0	7	1	2347	2661	2
1949	ENSMUSG00000017291	Taok1	78654	0	7	1	87	96	2
14833	ENSMUSG00000049775	Tmsb4x	2223	0	7	1	5586	6121	2
11986	ENSMUSG00000040785	Ttc3	98726	0	7	1	178	182	2
29791	ENSMUSG00000098274	Rpl24	5161	0	7	1	633	645	2
15810	ENSMUSG00000056880	Gadl1	166722	0	7	1	989	964	2
6864	ENSMUSG00000028649	Macf1	334728	0	7	1	27	23	2
18938	ENSMUSG00000059923	Grb2	64553	0	11	2	190	199	2
3935	ENSMUSG00000023067	Cdkn1a	9752	0	11	2	1155	1200	2
9416	ENSMUSG00000033565	Rbfox2	228015	0	11	2	83	81	2
6310	ENSMUSG00000026575	Nme7	133605	0	11	2	153	124	2
4237	ENSMUSG00000022054	Nefm	42257	0	23	5	3622	3653	2
8593	ENSMUSG00000031608	Galnt7	129205	0	10	2	1175	1389	1.87447
4068	ENSMUSG00000022629	Kif21a	116673	0	10	2	129	135	1.87447
2689	ENSMUSG00000021275	Tecpr2	83131	0	10	2	1093	1105	1.87447
582	ENSMUSG00000003452	Bicd1	154444	0	6	1	92	118	1.80735
5254	ENSMUSG00000025716	Myo3a	390750	0	6	1	11355	14555	1.80735
12617	ENSMUSG00000045983	Eif4g1	24572	0	6	1	111	129	1.80735
2135	ENSMUSG00000013236	Ptprs	64058	0	6	1	149	170	1.80735
3774	ENSMUSG00000024304	Cdh2	220370	0	6	1	95	107	1.80735
14509	ENSMUSG00000047675	Rps8	2417	0	6	1	451	502	1.80735
9097	ENSMUSG00000032549	Rab6b	73490	0	6	1	372	402	1.80735
7777	ENSMUSG00000030729	Pgm2l1	51475	0	6	1	93	99	1.80735
2069	ENSMUSG00000018171	Vmp1	99972	0	6	1	960	991	1.80735
3008	ENSMUSG00000021699	Pde4d	1503514	0	6	1	596	604	1.80735
19076	ENSMUSG00000063077	Kif1b	131375	0	6	1	224	227	1.80735
2654	ENSMUSG00000020396	Nefh	9311	0	6	1	205	199	1.80735
4992	ENSMUSG00000026131	Dst	400437	0	6	1	78	69	1.80735
1719	ENSMUSG00000018411	Mapt	100701	0	6	1	306	259	1.80735
5784	ENSMUSG00000026434	Nucks1	25788	0	6	1	111	93	1.80735
16486	ENSMUSG00000061080	Lsamp	2197319	0	6	1	91	76	1.80735
7496	ENSMUSG00000029461	Fam168a	135022	0	9	2	242	259	1.73697
24078	ENSMUSG00000079264	Gm11077	26770	0	12	3	940	986	1.70044
15448	ENSMUSG00000052727	Map1b	95095	0	59	18	654	623	1.65896
6445	ENSMUSG00000026489	Coq8a	34365	0	2	0	0	2	1.58496
16655	ENSMUSG00000059149	Mfsd4a	45257	0	2	0	2	10	1.58496
5989	ENSMUSG00000026436	Elk4	25006	0	2	0	2	8	1.58496
8169	ENSMUSG00000030655	Smg1	112363	0	2	0	9	29	1.58496
1469	ENSMUSG00000007880	Arid1a	77762	0	2	0	12	25	1.58496
2644	ENSMUSG00000020775	Mrpl38	7052	0	2	0	22	44	1.58496
5446	ENSMUSG00000025958	Creb1	71904	0	2	0	8	16	1.58496
8078	ENSMUSG00000031644	Nek1	138152	0	2	0	19	36	1.58496
6342	ENSMUSG00000027411	Vps16	19931	0	2	0	24	42	1.58496
17800	ENSMUSG00000060924	Csmd1	1643050	0	2	0	24	42	1.58496
8622	ENSMUSG00000030967	Zranb1	55250	0	2	0	11	19	1.58496
8769	ENSMUSG00000031592	Pcm1	92593	0	2	0	16	26	1.58496
6255	ENSMUSG00000027665	Pik3ca	70816	0	2	0	10	16	1.58496
16211	ENSMUSG00000053007	Creb5	413107	0	2	0	5	8	1.58496
13337	ENSMUSG00000046668	Cxxc5	32292	0	2	0	17	27	1.58496
4202	ENSMUSG00000023307	March5	14609	0	2	0	69	109	1.58496
42582	ENSMUSG00000111123	March5	14609	0	2	0	69	109	1.58496
6652	ENSMUSG00000027722	Spata5	159201	0	2	0	12	19	1.58496
5764	ENSMUSG00000027351	Spred1	60906	0	2	0	30	47	1.58496
13407	ENSMUSG00000042569	Dhrs7b	29565	0	2	0	18	28	1.58496
18561	ENSMUSG00000064341	mt-Nd1	957	0	2	0	3263	4894	1.58496
5634	ENSMUSG00000026490	Cdc42bpa	205132	0	2	0	20	30	1.58496
12999	ENSMUSG00000049658	Bdp1	86077	0	2	0	6	9	1.58496
5829	ENSMUSG00000026494	Kif26b	410076	0	2	0	38	56	1.58496
14944	ENSMUSG00000055737	Ghr	265733	0	2	0	19	28	1.58496
8252	ENSMUSG00000032002	Dcun1d5	23686	0	2	0	55	80	1.58496
3683	ENSMUSG00000022533	Atp13a3	93553	0	2	0	22	32	1.58496
3565	ENSMUSG00000024290	Rock1	117645	0	2	0	18	26	1.58496
8686	ENSMUSG00000031393	Mecp2	108772	0	2	0	18	26	1.58496
16070	ENSMUSG00000053477	Tcf4	345724	0	2	0	7	10	1.58496
4784	ENSMUSG00000024548	Setbp1	359012	0	2	0	7	10	1.58496
9455	ENSMUSG00000034342	Cbl	91074	0	2	0	24	34	1.58496
20192	ENSMUSG00000072966	Gprasp2	5697	0	2	0	38	53	1.58496
3064	ENSMUSG00000021144	Mta1	38929	0	2	0	46	64	1.58496
6668	ENSMUSG00000029629	Phf14	173397	0	2	0	29	40	1.58496
9829	ENSMUSG00000033671	Cep350	128292	0	2	0	8	11	1.58496
25942	ENSMUSG00000072704	Smim10l1	5991	0	2	0	49	67	1.58496
7446	ENSMUSG00000028822	Tmem50a	17176	0	2	0	90	123	1.58496
4509	ENSMUSG00000024858	Grk2	20222	0	2	0	50	68	1.58496
5348	ENSMUSG00000024533	Spire1	122582	0	2	0	89	121	1.58496
16549	ENSMUSG00000063800	Prpf38a	16165	0	2	0	42	57	1.58496
11028	ENSMUSG00000036693	Nop14	21613	0	2	0	40	54	1.58496
18505	ENSMUSG00000064354	mt-Co2	684	0	2	0	9731	13077	1.58496
3383	ENSMUSG00000020594	Pum2	78448	0	2	0	36	48	1.58496
8891	ENSMUSG00000031924	Cyb5b	36832	0	2	0	40	53	1.58496
3212	ENSMUSG00000021248	Tmed10	34234	0	2	0	96	127	1.58496
13318	ENSMUSG00000046573	Lyrm4	139132	0	2	0	81	107	1.58496
23679	ENSMUSG00000074212	Dnajb14	48883	0	2	0	28	37	1.58496
7104	ENSMUSG00000028790	Khdrbs1	39140	0	2	0	71	92	1.58496
2080	ENSMUSG00000011256	Adam19	91352	0	2	0	71	92	1.58496
7193	ENSMUSG00000028719	Cmpk1	27906	0	2	0	127	164	1.58496
381	ENSMUSG00000002661	Alkbh7	1984	0	2	0	31	40	1.58496
3365	ENSMUSG00000021978	Extl3	97796	0	2	0	42	54	1.58496
40091	ENSMUSG00000090112	Shprh	68169	0	2	0	14	18	1.58496
14249	ENSMUSG00000045962	Wnk1	114704	0	2	0	25	32	1.58496
9855	ENSMUSG00000032905	Atg12	11437	0	2	0	91	116	1.58496
37194	ENSMUSG00000092083	Kcnb2	436497	0	2	0	30	38	1.58496
9220	ENSMUSG00000032870	Smap2	48931	0	2	0	79	100	1.58496
5459	ENSMUSG00000025793	Hgs	16345	0	2	0	53	67	1.58496
54488	ENSMUSG00000116045	Hgs	16350	0	2	0	53	67	1.58496
11925	ENSMUSG00000040945	Rcc2	22680	0	2	0	50	63	1.58496
12526	ENSMUSG00000048076	Arf1	16859	0	2	0	241	303	1.58496
8551	ENSMUSG00000031012	Cask	334288	0	2	0	47	59	1.58496
11428	ENSMUSG00000038740	Mvb12b	157994	0	2	0	32	40	1.58496
10084	ENSMUSG00000036894	Rap2b	6793	0	2	0	16	20	1.58496
15144	ENSMUSG00000055024	Ep300	66727	0	2	0	12	15	1.58496
7461	ENSMUSG00000029642	Polr1d	34548	0	2	0	97	121	1.58496
6083	ENSMUSG00000027475	Kif3b	41978	0	2	0	53	66	1.58496
7713	ENSMUSG00000028820	Sfpq	15690	0	2	0	132	164	1.58496
1943	ENSMUSG00000010392	Gosr1	36978	0	2	0	25	31	1.58496
34142	ENSMUSG00000090071	Cdk5r2	2799	0	2	0	111	137	1.58496
3840	ENSMUSG00000024240	Epc1	80158	0	2	0	17	21	1.58496
6399	ENSMUSG00000027162	Lin7c	10151	0	2	0	141	174	1.58496
5792	ENSMUSG00000026566	Mpzl1	42299	0	2	0	73	90	1.58496
31255	ENSMUSG00000089917	Uckl1	15744	0	2	0	43	53	1.58496
12683	ENSMUSG00000049281	Scn3b	22402	0	2	0	176	216	1.58496
3233	ENSMUSG00000020794	Ube2g1	79199	0	2	0	53	65	1.58496
1011	ENSMUSG00000007029	Vars	15336	0	2	0	40	49	1.58496
10015	ENSMUSG00000036112	Metap2	38605	0	2	0	121	148	1.58496
12230	ENSMUSG00000040907	Atp1a3	27792	0	2	0	226	275	1.58496
2062	ENSMUSG00000015882	Lcorl	160435	0	2	0	23	28	1.58496
195	ENSMUSG00000001552	Jup	28806	0	2	0	194	236	1.58496
19085	ENSMUSG00000059713	Rcan3	21546	0	2	0	28	34	1.58496
3502	ENSMUSG00000022973	Synj1	75217	0	2	0	33	40	1.58496
18310	ENSMUSG00000058126	Tpm3-rs7	2147	0	2	0	71	86	1.58496
7932	ENSMUSG00000031561	Tenm3	616270	0	2	0	19	23	1.58496
11613	ENSMUSG00000040356	Skiv2l	10983	0	2	0	24	29	1.58496
5594	ENSMUSG00000027706	Sec62	28389	0	2	0	58	70	1.58496
8311	ENSMUSG00000030342	Cd9	34526	0	2	0	368	443	1.58496
8034	ENSMUSG00000030870	Ubfd1	15020	0	2	0	65	78	1.58496
3331	ENSMUSG00000020312	Shc2	19868	0	2	0	65	78	1.58496
4669	ENSMUSG00000024695	Zfp91	32467	0	2	0	55	66	1.58496
8236	ENSMUSG00000031897	Psmb10	2710	0	2	0	35	42	1.58496
8320	ENSMUSG00000030557	Mef2a	141696	0	2	0	35	42	1.58496
79	ENSMUSG00000000399	Ndufa9	27416	0	2	0	136	163	1.58496
9682	ENSMUSG00000032657	Fam189b	6153	0	2	0	97	116	1.58496
5217	ENSMUSG00000026113	Inpp4a	110872	0	2	0	52	62	1.58496
42770	ENSMUSG00000113149	Gm49383	14271	0	2	0	173	206	1.58496
1401	ENSMUSG00000019777	Hdac2	27346	0	2	0	102	121	1.58496
8594	ENSMUSG00000031093	Dock11	187731	0	2	0	43	51	1.58496
15453	ENSMUSG00000056962	Jmjd6	6018	0	2	0	22	26	1.58496
8860	ENSMUSG00000031442	Mcf2l	147100	0	2	0	72	85	1.58496
4692	ENSMUSG00000025432	Avil	20286	0	2	0	72	85	1.58496
1657	ENSMUSG00000019854	Reps1	69295	0	2	0	39	46	1.58496
16578	ENSMUSG00000063317	Usp31	65233	0	2	0	28	33	1.58496
4794	ENSMUSG00000025968	Ndufs1	33238	0	2	0	73	86	1.58496
10567	ENSMUSG00000036698	Ago2	89092	0	2	0	63	74	1.58496
46432	ENSMUSG00000110723	Gm49353	22987	0	2	0	86	101	1.58496
4524	ENSMUSG00000026315	Serpinb8	20479	0	2	0	92	108	1.58496
18531	ENSMUSG00000062328	Rpl17	4824	0	2	0	127	149	1.58496
495	ENSMUSG00000003380	Rabac1	3003	0	2	0	452	530	1.58496
26553	ENSMUSG00000070697	Utp3	1629	0	2	0	29	34	1.58496
10744	ENSMUSG00000037531	Mrpl47	12209	0	2	0	48	56	1.58496
6	ENSMUSG00000000056	Narf	18604	0	2	0	24	28	1.58496
4870	ENSMUSG00000025255	Zfhx4	197332	0	2	0	6	7	1.58496
7462	ENSMUSG00000029993	Nfu1	19226	0	2	0	123	143	1.58496
7695	ENSMUSG00000029917	C130060K24Rik	77046	0	2	0	37	43	1.58496
5276	ENSMUSG00000025878	Uimc1	72421	0	2	0	679	788	1.58496
15582	ENSMUSG00000054604	Cggbp1	7512	0	2	0	50	58	1.58496
243	ENSMUSG00000000823	Zfp512b	10701	0	2	0	44	51	1.58496
9272	ENSMUSG00000032575	Manf	53668	0	2	0	89	103	1.58496
16073	ENSMUSG00000055943	Emc7	17166	0	2	0	89	103	1.58496
7412	ENSMUSG00000028809	Srrm1	32838	0	2	0	19	22	1.58496
9139	ENSMUSG00000033510	Otud7a	314278	0	2	0	51	59	1.58496
11087	ENSMUSG00000037706	Cd81	15196	0	2	0	436	504	1.58496
19047	ENSMUSG00000068205	Macrod2	1997658	0	2	0	52	60	1.58496
8431	ENSMUSG00000030551	Nr2f2	14792	0	2	0	59	68	1.58496
4629	ENSMUSG00000025393	Atp5b	7119	0	2	0	1158	1331	1.58496
719	ENSMUSG00000003992	Ssbp2	243147	0	2	0	47	54	1.58496
10052	ENSMUSG00000037685	Atp8a1	229295	0	2	0	74	85	1.58496
4719	ENSMUSG00000026020	Nop58	34074	0	2	0	28	32	1.58496
6430	ENSMUSG00000028383	Hsdl2	37127	0	2	0	21	24	1.58496
10734	ENSMUSG00000037062	Sh3glb1	36658	0	2	0	135	154	1.58496
333	ENSMUSG00000001794	Capns1	11876	0	2	0	314	358	1.58496
7723	ENSMUSG00000029338	Antxr2	148261	0	2	0	207	236	1.58496
17332	ENSMUSG00000059040	Eno1b	3078	0	2	0	839	956	1.58496
6148	ENSMUSG00000028381	Ugcg	33577	0	2	0	36	41	1.58496
3300	ENSMUSG00000021451	Sema4d	108219	0	2	0	36	41	1.58496
4697	ENSMUSG00000025825	Iscu	5541	0	2	0	36	41	1.58496
5772	ENSMUSG00000027680	Fxr1	50380	0	2	0	58	66	1.58496
7306	ENSMUSG00000028452	Vcp	20545	0	2	0	204	232	1.58496
7270	ENSMUSG00000030020	Prickle2	335248	0	2	0	51	58	1.58496
379	ENSMUSG00000003161	Sri	23302	0	2	0	127	144	1.58496
5574	ENSMUSG00000027834	Serpini1	85949	0	2	0	106	120	1.58496
5073	ENSMUSG00000025939	Ube2w	78700	0	2	0	61	69	1.58496
8032	ENSMUSG00000031402	Mpp1	21284	0	2	0	54	61	1.58496
923	ENSMUSG00000005371	Fbxo11	74433	0	2	0	39	44	1.58496
2309	ENSMUSG00000020048	Hsp90b1	15301	0	2	0	86	97	1.58496
8474	ENSMUSG00000032020	Ubash3b	150600	0	2	0	103	116	1.58496
5633	ENSMUSG00000027581	Stmn3	8042	0	2	0	1605	1803	1.58496
10718	ENSMUSG00000036427	Gpi1	29007	0	2	0	406	456	1.58496
28161	ENSMUSG00000102836	Gm37013	863381	0	2	0	155	174	1.58496
11255	ENSMUSG00000039740	Alg2	9267	0	2	0	183	205	1.58496
12067	ENSMUSG00000039601	Rcan2	238166	0	2	0	75	84	1.58496
11039	ENSMUSG00000035390	Brsk1	25394	0	2	0	126	141	1.58496
17791	ENSMUSG00000060373	Hnrnpc	30652	0	2	0	128	143	1.58496
12619	ENSMUSG00000046572	Zfp518b	16343	0	2	0	17	19	1.58496
15112	ENSMUSG00000056770	Setd3	72884	0	2	0	137	153	1.58496
7353	ENSMUSG00000028832	Stmn1	5524	0	2	0	767	856	1.58496
8660	ENSMUSG00000030738	Eif3c	19957	0	2	0	183	204	1.58496
6726	ENSMUSG00000029621	Arpc1a	24932	0	2	0	141	157	1.58496
5743	ENSMUSG00000026547	Tagln2	7334	0	2	0	947	1053	1.58496
4740	ENSMUSG00000025736	Jmjd8	2977	0	2	0	45	50	1.58496
10339	ENSMUSG00000038587	Akap12	93091	0	2	0	172	191	1.58496
5099	ENSMUSG00000025855	Prkar1b	132696	0	2	0	306	339	1.58496
6682	ENSMUSG00000030282	Cmas	19029	0	2	0	121	134	1.58496
8154	ENSMUSG00000031642	Sh3rf1	172200	0	2	0	989	1095	1.58496
1316	ENSMUSG00000008200	Fnbp4	35652	0	2	0	112	124	1.58496
12914	ENSMUSG00000043091	Tuba1c	8220	0	2	0	982	1086	1.58496
860	ENSMUSG00000005705	Agrp	70696	0	2	0	916	1013	1.58496
14894	ENSMUSG00000055932	Fto	354915	0	2	0	48	53	1.58496
1869	ENSMUSG00000009470	Tnpo1	87366	0	2	0	514	567	1.58496
15702	ENSMUSG00000054976	Nyap2	264815	0	2	0	29	32	1.58496
6380	ENSMUSG00000026867	Gapvd1	80639	0	2	0	29	32	1.58496
3071	ENSMUSG00000021895	Arhgef3	289013	0	2	0	178	196	1.58496
13243	ENSMUSG00000046456	Tmem150b	18418	0	2	0	80	88	1.58496
9782	ENSMUSG00000035133	Arhgap5	68004	0	2	0	30	33	1.58496
10703	ENSMUSG00000036751	Cox6b1	9291	0	2	0	574	631	1.58496
13336	ENSMUSG00000047215	Rpl9	3081	0	2	0	314	345	1.58496
11282	ENSMUSG00000038976	Ppp1r9b	15865	0	2	0	61	67	1.58496
5480	ENSMUSG00000026159	Agfg1	61700	0	2	0	61	67	1.58496
17962	ENSMUSG00000063600	Egfem1	609187	0	2	0	31	34	1.58496
18131	ENSMUSG00000058443	Rpl10-ps3	768	0	2	0	808	885	1.58496
15766	ENSMUSG00000056185	Snx32	18304	0	2	0	1215	1330	1.58496
15285	ENSMUSG00000056201	Cfl1	4747	0	2	0	1201	1313	1.58496
12001	ENSMUSG00000039615	Stub1	2900	0	2	0	162	176	1.58496
5354	ENSMUSG00000024575	Pde6a	69610	0	2	0	2100	2280	1.58496
10808	ENSMUSG00000036155	Mgat5	283322	0	2	0	590	640	1.58496
1572	ENSMUSG00000018865	Sult4a1	29658	0	2	0	370	401	1.58496
10799	ENSMUSG00000035640	Cbarp	10385	0	2	0	180	195	1.58496
9089	ENSMUSG00000034075	Zdhhc5	27211	0	2	0	36	39	1.58496
10797	ENSMUSG00000038332	Sesn1	98490	0	2	0	12	13	1.58496
7327	ENSMUSG00000029106	Add1	58645	0	2	0	121	131	1.58496
10606	ENSMUSG00000036902	Neto2	64337	0	2	0	222	240	1.58496
6330	ENSMUSG00000026888	Grb14	112512	0	2	0	37	40	1.58496
30877	ENSMUSG00000092094	Zfp804b	575747	0	2	0	712	769	1.58496
21575	ENSMUSG00000074746	Pdzd8	48603	0	2	0	785	847	1.58496
14991	ENSMUSG00000057113	Npm1	10920	0	2	0	346	373	1.58496
8125	ENSMUSG00000031954	Cfdp1	85801	0	2	0	65	70	1.58496
19112	ENSMUSG00000058230	Arhgap35	121275	0	2	0	52	56	1.58496
11286	ENSMUSG00000039747	Orai2	23255	0	2	0	39	42	1.58496
9916	ENSMUSG00000032625	Thsd7a	437801	0	2	0	13	14	1.58496
15344	ENSMUSG00000056486	Chn1	164687	0	2	0	250	269	1.58496
3240	ENSMUSG00000020451	Limk2	64934	0	2	0	66	71	1.58496
15925	ENSMUSG00000050379	Sept6	80469	0	2	0	81	87	1.58496
7957	ENSMUSG00000032294	Pkm	23008	0	2	0	342	367	1.58496
10246	ENSMUSG00000036752	Tubb4b	2543	0	2	0	603	647	1.58496
19370	ENSMUSG00000062456	Rpl9-ps6	714	0	2	0	834	893	1.58496
26318	ENSMUSG00000073702	Rpl31	4070	0	2	0	400	427	1.58496
12841	ENSMUSG00000047139	Cd24a	5982	0	2	0	387	413	1.58496
22938	ENSMUSG00000074656	Eif2s2	21526	0	2	0	138	147	1.58496
13577	ENSMUSG00000047037	Nipa1	42388	0	2	0	687	731	1.58496
12090	ENSMUSG00000040855	Reps2	231696	0	2	0	1193	1266	1.58496
1087	ENSMUSG00000007739	Cct4	13262	0	2	0	297	315	1.58496
12151	ENSMUSG00000039485	Tspyl4	3879	0	2	0	199	211	1.58496
956	ENSMUSG00000007564	Ppp2r1a	20606	0	2	0	451	478	1.58496
2648	ENSMUSG00000020362	Cnot6	41221	0	2	0	355	376	1.58496
991	ENSMUSG00000004267	Eno2	9621	0	2	0	254	269	1.58496
4562	ENSMUSG00000025007	Aldh18a1	38207	0	2	0	102	108	1.58496
44902	ENSMUSG00000117310	Ptp4a1	9469	0	2	0	113	119	1.58496
13027	ENSMUSG00000047459	Dynlrb1	13745	0	2	0	417	439	1.58496
18300	ENSMUSG00000067274	Rplp0	4261	0	2	0	857	902	1.58496
5102	ENSMUSG00000026409	Pfkfb2	40072	0	2	0	20	21	1.58496
1907	ENSMUSG00000015092	Edf1	4236	0	2	0	207	217	1.58496
21862	ENSMUSG00000079426	Arpc4	12334	0	2	0	214	224	1.58496
8473	ENSMUSG00000030555	Ttc23	115503	0	2	0	107	112	1.58496
5643	ENSMUSG00000028086	Fbxw7	163931	0	2	0	131	137	1.58496
3413	ENSMUSG00000020153	Ndufs7	7674	0	2	0	132	138	1.58496
25763	ENSMUSG00000075706	Gpx4	9274	0	2	0	313	327	1.58496
4924	ENSMUSG00000026064	Ptp4a1	9008	0	2	0	113	118	1.58496
9758	ENSMUSG00000033597	Caskin1	20071	0	2	0	46	48	1.58496
14630	ENSMUSG00000051934	Spats2	87300	0	2	0	24	25	1.58496
11699	ENSMUSG00000040928	S100pbp	41723	0	2	0	24	25	1.58496
16171	ENSMUSG00000051118	Olfr77	12260	0	2	0	1158	1205	1.58496
309	ENSMUSG00000003346	Abhd17a	6688	0	2	0	149	155	1.58496
14930	ENSMUSG00000051111	Sv2c	177984	0	2	0	155	161	1.58496
16897	ENSMUSG00000063882	Uqcrh	8107	0	2	0	285	296	1.58496
3715	ENSMUSG00000022820	Ndufb4	7284	0	2	0	220	228	1.58496
3000	ENSMUSG00000020290	Xpo1	42209	0	2	0	56	58	1.58496
9844	ENSMUSG00000034088	Hdlbp	72876	0	2	0	86	89	1.58496
12508	ENSMUSG00000046841	Ckap4	7758	0	2	0	61	63	1.58496
18722	ENSMUSG00000058690	Ccser2	93842	0	2	0	61	63	1.58496
6618	ENSMUSG00000027940	Tpm3	28254	0	2	0	93	96	1.58496
6017	ENSMUSG00000026856	Dolpp1	8276	0	2	0	31	32	1.58496
2216	ENSMUSG00000019179	Mdh2	11919	0	2	0	420	433	1.58496
1821	ENSMUSG00000014313	Cox6c	12361	0	2	0	371	382	1.58496
6251	ENSMUSG00000027652	Ralgapb	89406	0	2	0	138	142	1.58496
18590	ENSMUSG00000060126	Tpt1	3433	0	2	0	796	819	1.58496
777	ENSMUSG00000006651	Aplp1	10554	0	2	0	455	466	1.58496
26462	ENSMUSG00000069729	Arid1b	353325	0	2	0	44	45	1.58496
7706	ENSMUSG00000029221	Slc30a9	51489	0	2	0	89	91	1.58496
13250	ENSMUSG00000048120	Entpd1	129237	0	2	0	91	93	1.58496
21595	ENSMUSG00000070304	Scn2b	12289	0	2	0	47	48	1.58496
8188	ENSMUSG00000031189	Aff2	507744	0	2	0	739	749	1.58496
2833	ENSMUSG00000021690	Jmy	69708	0	2	0	77	78	1.58496
23593	ENSMUSG00000072487	Mroh5	78290	0	2	0	287	290	1.58496
14080	ENSMUSG00000045128	Rpl18a	2691	0	2	0	654	659	1.58496
15043	ENSMUSG00000054162	Spock3	406095	0	2	0	142	143	1.58496
16302	ENSMUSG00000052085	Dock8	202899	0	2	0	289	291	1.58496
9895	ENSMUSG00000032422	Snx14	62209	0	2	0	736	741	1.58496
19312	ENSMUSG00000058297	Spock2	28980	0	2	0	187	187	1.58496
6860	ENSMUSG00000030268	Bcat1	82350	0	2	0	187	187	1.58496
4759	ENSMUSG00000026087	Mrpl30	8059	0	2	0	143	143	1.58496
6588	ENSMUSG00000027002	Nckap1	80869	0	2	0	114	114	1.58496
14792	ENSMUSG00000055065	Ddx17	19006	0	2	0	107	107	1.58496
18799	ENSMUSG00000058355	Abce1	28279	0	2	0	91	91	1.58496
6665	ENSMUSG00000029405	G3bp2	31574	0	2	0	88	88	1.58496
12053	ENSMUSG00000041556	Fbxo2	5804	0	2	0	78	78	1.58496
10746	ENSMUSG00000038084	Opa1	75551	0	2	0	74	74	1.58496
5731	ENSMUSG00000028382	Ptbp3	77497	0	2	0	42	42	1.58496
6263	ENSMUSG00000028399	Ptprd	2270724	0	2	0	38	38	1.58496
16967	ENSMUSG00000063410	Stk24	93669	0	2	0	24	24	1.58496
8124	ENSMUSG00000032280	Tle3	46132	0	2	0	16	16	1.58496
7524	ENSMUSG00000030059	Tmf1	26126	0	2	0	15	15	1.58496
18456	ENSMUSG00000064065	Ipcef1	166683	0	2	0	15	15	1.58496
7057	ENSMUSG00000030232	Aebp2	55810	0	2	0	15	15	1.58496
12802	ENSMUSG00000045991	Onecut2	60968	0	2	0	11	11	1.58496
4131	ENSMUSG00000022865	Cxadr	58286	0	2	0	8	8	1.58496
14606	ENSMUSG00000049230	Gm9833	4456	0	2	0	3	3	1.58496
8965	ENSMUSG00000032712	Resf1	26250	0	2	0	2	2	1.58496
14484	ENSMUSG00000049422	Chchd10	4618	0	2	0	363	363	1.58496
809	ENSMUSG00000004347	Pde1c	499300	0	2	0	41	41	1.58496
6416	ENSMUSG00000026554	Dcaf8	48922	0	2	0	21	21	1.58496
11615	ENSMUSG00000039244	E130309D02Rik	14166	0	2	0	19	19	1.58496
29461	ENSMUSG00000093661	Eif4e3	41637	0	2	0	14	14	1.58496
52767	ENSMUSG00000110939	AC121298.1	35705	0	2	0	0	0	1.58496
17681	ENSMUSG00000057863	Rpl36	828	0	2	0	525	522	1.58496
7790	ENSMUSG00000030647	Ndufc2	7800	0	2	0	316	314	1.58496
13004	ENSMUSG00000042581	Thsd7b	945977	0	2	0	630	625	1.58496
14325	ENSMUSG00000046364	Rpl27a	3221	0	2	0	239	237	1.58496
5078	ENSMUSG00000026335	Pam	300533	0	2	0	443	439	1.58496
3903	ENSMUSG00000023904	Hcfc1r1	1632	0	2	0	327	324	1.58496
4959	ENSMUSG00000026011	Ctla4	28833	0	2	0	690	683	1.58496
7955	ENSMUSG00000031783	Polr2c	16086	0	2	0	386	382	1.58496
7646	ENSMUSG00000028552	Eps15	107550	0	2	0	191	189	1.58496
3577	ENSMUSG00000024381	Bin1	58508	0	2	0	75	74	1.58496
10666	ENSMUSG00000037410	Tbc1d2b	68778	0	2	0	142	140	1.58496
9012	ENSMUSG00000033965	Slc16a2	124570	0	2	0	563	555	1.58496
104	ENSMUSG00000000740	Rpl13	2895	0	2	0	551	543	1.58496
11300	ENSMUSG00000040631	Dok4	12503	0	2	0	363	357	1.58496
36859	ENSMUSG00000087194	Skint6	482358	0	2	0	318	311	1.58496
8099	ENSMUSG00000030609	Aen	15356	0	2	0	174	170	1.58496
16344	ENSMUSG00000051853	Arf3	26581	0	2	0	126	123	1.58496
21625	ENSMUSG00000078970	Wdr92	51690	0	2	0	181	176	1.58496
432	ENSMUSG00000002997	Prkar2b	102821	0	2	0	104	101	1.58496
10820	ENSMUSG00000038421	Fcrla	10008	0	2	0	237	230	1.58496
11539	ENSMUSG00000041164	Zmiz2	17085	0	2	0	67	65	1.58496
3812	ENSMUSG00000022892	App	224082	0	2	0	365	354	1.58496
2154	ENSMUSG00000016308	Ube2a	10323	0	2	0	88	85	1.58496
19311	ENSMUSG00000067889	Sptbn2	41194	0	2	0	55	53	1.58496
9972	ENSMUSG00000033004	Mycbp2	233404	0	2	0	27	26	1.58496
7241	ENSMUSG00000029632	Ndufa4	7206	0	2	0	644	620	1.58496
10935	ENSMUSG00000038615	Nfe2l1	12555	0	2	0	105	101	1.58496
7610	ENSMUSG00000029145	Eif2b4	5873	0	2	0	74	71	1.58496
1702	ENSMUSG00000014349	Ube2z	17957	0	2	0	112	107	1.58496
10462	ENSMUSG00000036199	Ndufa13	8379	0	2	0	244	233	1.58496
10168	ENSMUSG00000036667	Tcaf1	42087	0	2	0	106	101	1.58496
5630	ENSMUSG00000028273	Pdlim5	156107	0	2	0	21	20	1.58496
322	ENSMUSG00000001924	Uba1	24854	0	2	0	318	302	1.58496
13144	ENSMUSG00000048967	Yjefn3	14925	0	2	0	253	240	1.58496
10741	ENSMUSG00000035847	Ids	22016	0	2	0	214	203	1.58496
2087	ENSMUSG00000008658	Rbfox1	1526172	0	2	0	77	73	1.58496
2708	ENSMUSG00000021133	Susd6	90326	0	2	0	19	18	1.58496
35182	ENSMUSG00000089984	Fbxo24	16500	0	2	0	226	214	1.58496
17726	ENSMUSG00000064264	Zfp428	8677	0	2	0	92	87	1.58496
5536	ENSMUSG00000026728	Vim	8900	0	2	0	982	927	1.58496
11341	ENSMUSG00000041841	Rpl37	2496	0	2	0	523	493	1.58496
7407	ENSMUSG00000029053	Prkcz	101233	0	2	0	52	49	1.58496
12371	ENSMUSG00000039704	Lmbrd2	61934	0	2	0	52	49	1.58496
4065	ENSMUSG00000023764	Sfi1	61614	0	2	0	16	15	1.58496
967	ENSMUSG00000005514	Por	65294	0	2	0	48	45	1.58496
507	ENSMUSG00000003068	Stk11	14880	0	2	0	64	60	1.58496
16990	ENSMUSG00000060703	Cd302	32496	0	2	0	171	160	1.58496
5384	ENSMUSG00000025860	Xiap	49978	0	2	0	31	29	1.58496
9542	ENSMUSG00000034275	Igsf9b	58343	0	2	0	31	29	1.58496
5767	ENSMUSG00000026782	Abi2	71540	0	2	0	61	57	1.58496
6583	ENSMUSG00000028329	Xpa	40965	0	2	0	43	40	1.58496
6748	ENSMUSG00000028988	Ctnnbip1	48202	0	2	0	71	66	1.58496
10298	ENSMUSG00000036769	Wdr44	112975	0	2	0	14	13	1.58496
7456	ENSMUSG00000029763	Exoc4	724895	0	2	0	56	52	1.58496
7114	ENSMUSG00000029122	Evc	47797	0	2	0	207	192	1.58496
9801	ENSMUSG00000035027	Map2k2	28061	0	2	0	137	127	1.58496
15307	ENSMUSG00000055053	Nfic	59450	0	2	0	54	50	1.58496
5436	ENSMUSG00000026356	Dars	53662	0	2	0	93	86	1.58496
12812	ENSMUSG00000042298	Ttc19	46979	0	2	0	66	61	1.58496
22073	ENSMUSG00000071533	Pcnp	22495	0	2	0	132	122	1.58496
9979	ENSMUSG00000035158	Mitf	214298	0	2	0	101	93	1.58496
6940	ENSMUSG00000029657	Hsph1	22090	0	2	0	50	46	1.58496
7024	ENSMUSG00000029014	Dnajc2	27985	0	2	0	50	46	1.58496
10557	ENSMUSG00000036377	C530008M17Rik	217043	0	2	0	75	69	1.58496
12574	ENSMUSG00000047888	Tnrc6b	229773	0	2	0	12	11	1.58496
11466	ENSMUSG00000039852	Rere	340321	0	2	0	103	94	1.58496
1717	ENSMUSG00000019861	Gopc	46275	0	2	0	88	80	1.58496
33204	ENSMUSG00000094910	D430019H16Rik	39240	0	2	0	119	108	1.58496
4129	ENSMUSG00000024165	Jpt2	23271	0	2	0	54	49	1.58496
15949	ENSMUSG00000057236	Rbbp4	28271	0	2	0	118	107	1.58496
14099	ENSMUSG00000046404	Yod1	7032	0	2	0	10	9	1.58496
5323	ENSMUSG00000024404	Riok3	28647	0	2	0	86	77	1.58496
10775	ENSMUSG00000036371	Serbp1	59561	0	2	0	188	168	1.58496
6858	ENSMUSG00000030172	Erc1	277372	0	2	0	28	25	1.58496
576	ENSMUSG00000002265	Peg3	26540	0	2	0	27	24	1.58496
16123	ENSMUSG00000050556	Kcnb1	94187	0	2	0	27	24	1.58496
10329	ENSMUSG00000037503	Fam168b	29847	0	2	0	116	103	1.58496
5118	ENSMUSG00000025362	Rps26	2214	0	2	0	955	846	1.58496
14073	ENSMUSG00000041939	Mvk	16323	0	2	0	69	61	1.58496
7155	ENSMUSG00000028600	Podn	81655	0	2	0	85	75	1.58496
14529	ENSMUSG00000045576	St7l	66060	0	2	0	178	157	1.58496
15069	ENSMUSG00000054199	Gon4l	74873	0	2	0	50	44	1.58496
15236	ENSMUSG00000057406	Nsd2	77251	0	2	0	58	51	1.58496
12967	ENSMUSG00000048895	Cdk5r1	4162	0	2	0	66	58	1.58496
16625	ENSMUSG00000063063	Ctnna2	1098063	0	2	0	98	86	1.58496
137	ENSMUSG00000000420	Galnt1	81475	0	2	0	32	28	1.58496
15659	ENSMUSG00000051331	Cacna1c	609179	0	2	0	32	28	1.58496
18796	ENSMUSG00000060098	Prmt7	41859	0	2	0	68	59	1.58496
19902	ENSMUSG00000078722	Gm12394	74844	0	2	0	15	13	1.58496
12076	ENSMUSG00000040351	Ankib1	112926	0	2	0	30	26	1.58496
19223	ENSMUSG00000059742	Kcnh7	490874	0	2	0	14	12	1.58496
9985	ENSMUSG00000033953	Ppp3r1	41113	0	2	0	131	112	1.58496
7575	ENSMUSG00000028603	Scp2	101160	0	2	0	95	81	1.58496
4968	ENSMUSG00000026245	Farsb	70923	0	2	0	115	97	1.58496
14682	ENSMUSG00000052613	Pcdh15	1550396	0	2	0	37	31	1.58496
3202	ENSMUSG00000021669	Col4a3bp	97550	0	2	0	29	24	1.58496
6857	ENSMUSG00000029486	Mrpl1	57235	0	2	0	34	28	1.58496
9776	ENSMUSG00000032393	Dpp8	50238	0	2	0	28	23	1.58496
24531	ENSMUSG00000074698	Csnk2a1	55014	0	2	0	94	77	1.58496
11875	ENSMUSG00000041763	Tpp2	69354	0	2	0	60	49	1.58496
621	ENSMUSG00000006362	Cbfa2t3	73969	0	2	0	27	22	1.58496
3783	ENSMUSG00000022521	Crebbp	132670	0	2	0	16	13	1.58496
6374	ENSMUSG00000027035	Cers6	252842	0	2	0	21	17	1.58496
4599	ENSMUSG00000025873	Faf2	42280	0	2	0	47	38	1.58496
13844	ENSMUSG00000043683	Fem1a	6801	0	2	0	41	33	1.58496
437	ENSMUSG00000003279	Dlgap1	852341	0	2	0	79	63	1.58496
10675	ENSMUSG00000038473	Nos1ap	287194	0	2	0	69	55	1.58496
5465	ENSMUSG00000025261	Huwe1	134611	0	2	0	68	54	1.58496
9707	ENSMUSG00000035152	Ap2b1	106012	0	2	0	131	104	1.58496
8991	ENSMUSG00000032458	Copb2	24662	0	2	0	101	80	1.58496
24645	ENSMUSG00000069049	Eif2s3y	18305	0	2	0	14	11	1.58496
7012	ENSMUSG00000030276	Ttll3	25328	0	2	0	28	22	1.58496
51803	ENSMUSG00000103897	Pcdhga8	116168	0	2	0	28	22	1.58496
13079	ENSMUSG00000047213	Ythdf3	33826	0	2	0	56	44	1.58496
4402	ENSMUSG00000022270	Retreg1	130508	0	2	0	77	60	1.58496
19948	ENSMUSG00000068739	Sars	20345	0	2	0	131	102	1.58496
16389	ENSMUSG00000055733	Nap1l3	2837	0	2	0	27	21	1.58496
11150	ENSMUSG00000038384	Setd1b	26437	0	2	0	22	17	1.58496
14898	ENSMUSG00000056429	Tgoln1	8569	0	2	0	44	34	1.58496
16151	ENSMUSG00000051510	Mafg	8484	0	2	0	48	37	1.58496
8998	ENSMUSG00000033208	S100b	7307	0	2	0	39	30	1.58496
2838	ENSMUSG00000021945	Zmym2	76049	0	2	0	34	26	1.58496
100	ENSMUSG00000000631	Myo18a	102735	0	2	0	34	26	1.58496
10063	ENSMUSG00000036104	Rab3gap1	75096	0	2	0	29	22	1.58496
2798	ENSMUSG00000020700	Map3k3	70834	0	2	0	12	9	1.58496
18179	ENSMUSG00000058704	Memo1	96486	0	2	0	68	51	1.58496
14950	ENSMUSG00000054885	4930578G10Rik	110704	0	2	0	23	17	1.58496
4435	ENSMUSG00000023845	Lnpep	103641	0	2	0	64	47	1.58496
16140	ENSMUSG00000051351	Zfp46	9260	0	2	0	18	13	1.58496
18699	ENSMUSG00000059851	Kmt5c	7400	0	2	0	14	10	1.58496
10394	ENSMUSG00000037526	Atg14	29757	0	2	0	14	10	1.58496
12309	ENSMUSG00000040112	Mrps35	31228	0	2	0	27	19	1.58496
4520	ENSMUSG00000024472	Dcp2	44468	0	2	0	23	16	1.58496
10619	ENSMUSG00000038143	Stox2	266315	0	2	0	26	18	1.58496
12071	ENSMUSG00000039218	Srrm2	34210	0	2	0	72	49	1.58496
1464	ENSMUSG00000018341	Il12rb2	84871	0	2	0	6	4	1.58496
11436	ENSMUSG00000041444	Arhgap32	152311	0	2	0	6	4	1.58496
5798	ENSMUSG00000028337	Coro2a	65266	0	2	0	54	36	1.58496
9838	ENSMUSG00000034145	Tmem63c	68704	0	2	0	32	21	1.58496
14804	ENSMUSG00000052353	Cemip	153646	0	2	0	75	49	1.58496
4123	ENSMUSG00000022432	Smc1b	67276	0	2	0	11	7	1.58496
3443	ENSMUSG00000024073	Birc6	175062	0	2	0	23	14	1.58496
19485	ENSMUSG00000074794	Arrdc3	12659	0	2	0	22	13	1.58496
14030	ENSMUSG00000044791	Setd2	86037	0	2	0	17	10	1.58496
2739	ENSMUSG00000020412	Ascc2	47953	0	2	0	7	4	1.58496
9456	ENSMUSG00000033237	Arid2	117475	0	2	0	9	5	1.58496
18229	ENSMUSG00000061601	Pclo	348542	0	2	0	53	27	1.58496
10060	ENSMUSG00000038095	Sbno1	57300	0	2	0	38	19	1.58496
7473	ENSMUSG00000030199	Etv6	234459	0	2	0	23	10	1.58496
12226	ENSMUSG00000039239	Tgfb2	83198	0	2	0	22	9	1.58496
10438	ENSMUSG00000036822	Topors	10250	0	2	0	15	6	1.58496
10193	ENSMUSG00000035681	Kcnc2	195904	0	2	0	4	1	1.58496
10806	ENSMUSG00000038642	Ctss	29618	0	2	0	5	1	1.58496
9287	ENSMUSG00000033499	Larp4b	80571	0	5	1	30	42	1.58496
5566	ENSMUSG00000028161	Ppp3ca	267604	0	5	1	122	148	1.58496
2452	ENSMUSG00000021957	Tkt	26362	0	5	1	146	172	1.58496
9563	ENSMUSG00000033854	Kcnk10	148874	0	5	1	59	69	1.58496
15931	ENSMUSG00000051177	Plcb1	689192	0	5	1	753	878	1.58496
4556	ENSMUSG00000024780	Cdc37l1	36330	0	5	1	761	844	1.58496
56172	ENSMUSG00000117338	RPS10-NUDT3	54443	0	5	1	675	743	1.58496
2400	ENSMUSG00000020340	Cyfip2	119010	0	5	1	474	521	1.58496
5813	ENSMUSG00000026970	Rbms1	213000	0	5	1	102	112	1.58496
5660	ENSMUSG00000028080	Lrba	558013	0	5	1	3120	3404	1.58496
36050	ENSMUSG00000091955	Gm9844	485	0	5	1	3351	3628	1.58496
5288	ENSMUSG00000026219	Trip12	119328	0	5	1	50	54	1.58496
11476	ENSMUSG00000039470	Zdhhc2	86454	0	5	1	310	332	1.58496
7632	ENSMUSG00000028410	Dnaja1	15000	0	5	1	445	464	1.58496
10122	ENSMUSG00000036086	Zranb3	148864	0	5	1	637	657	1.58496
2362	ENSMUSG00000020894	Vamp2	3895	0	5	1	488	503	1.58496
35482	ENSMUSG00000089989	Gm45713	10310	0	5	1	808	822	1.58496
25704	ENSMUSG00000074129	Rpl13a	3204	0	5	1	854	867	1.58496
11836	ENSMUSG00000040952	Rps19	5436	0	5	1	741	748	1.58496
14651	ENSMUSG00000054766	Set	15200	0	5	1	250	241	1.58496
892	ENSMUSG00000005610	Eif4g2	15281	0	5	1	742	712	1.58496
3752	ENSMUSG00000024393	Prrc2a	15822	0	5	1	81	77	1.58496
1184	ENSMUSG00000018286	Psmb6	2492	0	5	1	321	304	1.58496
9082	ENSMUSG00000032479	Map4	152496	0	5	1	314	294	1.58496
4661	ENSMUSG00000024608	Rps14	31449	0	5	1	711	664	1.58496
1428	ENSMUSG00000014602	Kif1a	86488	0	5	1	318	285	1.58496
13244	ENSMUSG00000048349	Pou4f1	6324	0	5	1	136	117	1.58496
13344	ENSMUSG00000045083	Lingo2	1245101	0	5	1	38	32	1.58496
6337	ENSMUSG00000028124	Gclm	25176	0	8	2	2616	2896	1.58496
5201	ENSMUSG00000026238	Ptma	3987	0	8	2	740	818	1.58496
8735	ENSMUSG00000030849	Fgfr2	2960900	0	11	3	1442	1648	1.58496
5773	ENSMUSG00000027500	Stmn2	52247	0	11	3	2064	2191	1.58496
3940	ENSMUSG00000022055	Nefl	5233	0	11	3	2545	2640	1.58496
4134	ENSMUSG00000022812	Gsk3b	157084	0	11	3	114	107	1.58496
16300	ENSMUSG00000057322	Rpl38	3808	0	10	3	539	577	1.45943
8401	ENSMUSG00000032216	Nedd4	87507	0	10	3	219	211	1.45943
5704	ENSMUSG00000027523	Gnas	62425	0	18	6	1175	1217	1.44057
1478	ENSMUSG00000008489	Elavl2	150023	0	7	2	220	254	1.41504
12201	ENSMUSG00000040269	Mrps28	121773	0	7	2	305	307	1.41504
5369	ENSMUSG00000024579	Pcyox1l	10799	0	7	2	31	28	1.41504
7851	ENSMUSG00000031229	Atrx	131789	0	7	2	36	20	1.41504
1588	ENSMUSG00000015656	Hspa8	9104	0	15	5	2093	2122	1.41504
2012	ENSMUSG00000015599	Ttbk1	45228	0	4	1	35	47	1.32193
17673	ENSMUSG00000057858	Fam204a	28116	0	4	1	69	90	1.32193
8596	ENSMUSG00000030889	Vwa3a	66425	0	4	1	60	77	1.32193
3163	ENSMUSG00000020300	Cpeb4	63424	0	4	1	59	74	1.32193
19060	ENSMUSG00000059409	Ppp2r5d	22121	0	4	1	78	94	1.32193
10045	ENSMUSG00000037270	4932438A13Rik	189930	0	4	1	20	24	1.32193
362	ENSMUSG00000001833	Sept7	56133	0	4	1	151	178	1.32193
5456	ENSMUSG00000025019	Lcor	79625	0	4	1	320	362	1.32193
1820	ENSMUSG00000008136	Fhl2	73911	0	4	1	835	940	1.32193
2778	ENSMUSG00000020601	Trib2	25196	0	4	1	245	274	1.32193
15383	ENSMUSG00000052146	Rps10	6252	0	4	1	676	746	1.32193
21687	ENSMUSG00000079477	Rab7	46165	0	4	1	264	289	1.32193
15295	ENSMUSG00000052560	Cpne8	191951	0	4	1	106	116	1.32193
1629	ENSMUSG00000008668	Rps18	4003	0	4	1	486	528	1.32193
13851	ENSMUSG00000042323	Pbrm1	102455	0	4	1	176	191	1.32193
15461	ENSMUSG00000056537	Rlim	24122	0	4	1	41	44	1.32193
11741	ENSMUSG00000041014	Nrg3	1104137	0	4	1	590	595	1.32193
26168	ENSMUSG00000071415	Rpl23	4911	0	4	1	773	777	1.32193
4818	ENSMUSG00000025290	Rps24	9835	0	4	1	1002	1006	1.32193
1763	ENSMUSG00000017781	Pitpna	40708	0	4	1	887	890	1.32193
2695	ENSMUSG00000022012	Enox1	564998	0	4	1	795	775	1.32193
12077	ENSMUSG00000039697	Ncoa7	174328	0	4	1	156	150	1.32193
6513	ENSMUSG00000028194	Ddah1	135603	0	4	1	519	498	1.32193
4729	ENSMUSG00000025730	Rab40c	37614	0	4	1	543	519	1.32193
609	ENSMUSG00000004317	Clcn5	165549	0	4	1	37	35	1.32193
38748	ENSMUSG00000103458	Gm42416	887460	0	4	1	178	168	1.32193
2206	ENSMUSG00000009927	Rps25	3289	0	4	1	679	620	1.32193
19355	ENSMUSG00000059974	Ntm	968392	0	4	1	88	73	1.32193
34521	ENSMUSG00000092544	Gm20422	32025	0	4	1	55	41	1.32193
55513	ENSMUSG00000116358	Gm49450	21415	0	9	3	8901	9854	1.32193
1677	ENSMUSG00000019865	Nmbr	65260	0	14	5	2128	2157	1.32193
25172	ENSMUSG00000074657	Kif5a	37653	0	11	4	318	321	1.26303
52530	ENSMUSG00000113061	Gm11361	607	0	6	2	779	826	1.22239
4329	ENSMUSG00000023018	Smarcd1	11863	0	6	2	583	585	1.22239
15664	ENSMUSG00000050621	Rps27rt	374	0	6	2	555	554	1.22239
11807	ENSMUSG00000040875	Osbpl10	253657	0	6	2	595	593	1.22239
9210	ENSMUSG00000034994	Eef2	5868	0	6	2	898	889	1.22239
13066	ENSMUSG00000043336	Filip1l	220034	0	23	10	123	185	1.12553
4043	ENSMUSG00000022748	Cmss1	304865	0	22	10	152	197	1.06413
11638	ENSMUSG00000038777	Sema6c	13568	0	1	0	0	3	1
3841	ENSMUSG00000024056	Ndc80	30758	0	1	0	0	3	1
9997	ENSMUSG00000035948	Acss3	190152	0	1	0	0	2	1
21846	ENSMUSG00000079259	Trim71	57237	0	1	0	0	1	1
15240	ENSMUSG00000050150	Slc9b1	49799	0	1	0	0	1	1
38043	ENSMUSG00000093987	Gm21704	43021	0	1	0	0	1	1
33533	ENSMUSG00000095852	Gm10256	42794	0	1	0	0	1	1
76	ENSMUSG00000000248	Clec2g	50327	0	1	0	0	1	1
16691	ENSMUSG00000066440	Zfyve26	63959	0	1	0	1	5	1
10876	ENSMUSG00000038208	Pgap3	11814	0	1	0	2	9	1
11367	ENSMUSG00000039253	Fn3krp	9888	0	1	0	2	9	1
8116	ENSMUSG00000031376	Atp2b3	67920	0	1	0	2	8	1
18	ENSMUSG00000000126	Wnt9a	26625	0	1	0	1	4	1
4087	ENSMUSG00000024042	Sik1	11555	0	1	0	1	4	1
3375	ENSMUSG00000021592	Arsk	38239	0	1	0	2	7	1
7480	ENSMUSG00000029624	Ptcd1	19595	0	1	0	3	10	1
9202	ENSMUSG00000034297	Med13	90570	0	1	0	5	15	1
10581	ENSMUSG00000036461	Elf1	101301	0	1	0	2	6	1
13740	ENSMUSG00000042213	Zfand4	66081	0	1	0	1	3	1
15369	ENSMUSG00000050229	Pigm	7554	0	1	0	9	25	1
8580	ENSMUSG00000032305	Fam219b	5657	0	1	0	9	25	1
868	ENSMUSG00000006471	Ndor1	11202	0	1	0	4	11	1
49881	ENSMUSG00000115074	Ndor1	10524	0	1	0	4	11	1
2949	ENSMUSG00000021715	Cwc27	186003	0	1	0	4	11	1
25681	ENSMUSG00000075256	Cerkl	126243	0	1	0	4	11	1
11922	ENSMUSG00000039473	Ubn1	36233	0	1	0	6	16	1
14295	ENSMUSG00000046897	Zfp740	12358	0	1	0	6	15	1
6066	ENSMUSG00000028370	Pappa	233336	0	1	0	2	5	1
10748	ENSMUSG00000036580	Spg20	25215	0	1	0	5	12	1
5639	ENSMUSG00000027425	Kat14	38694	0	1	0	5	12	1
9536	ENSMUSG00000035011	Zbtb7a	17776	0	1	0	8	19	1
11232	ENSMUSG00000040520	Manea	22386	0	1	0	8	19	1
8989	ENSMUSG00000032384	Csnk1g1	136092	0	1	0	17	40	1
399	ENSMUSG00000003228	Grk5	206220	0	1	0	9	21	1
14911	ENSMUSG00000055567	Unc80	230782	0	1	0	3	7	1
7310	ENSMUSG00000029191	Rfc1	73821	0	1	0	8	18	1
5681	ENSMUSG00000027550	Lrrcc1	38871	0	1	0	4	9	1
15357	ENSMUSG00000052861	Dnah6	204046	0	1	0	4	9	1
4636	ENSMUSG00000025893	Kbtbd3	21900	0	1	0	6	13	1
10119	ENSMUSG00000035578	Iqcg	43536	0	1	0	6	13	1
2825	ENSMUSG00000020659	Cbll1	14788	0	1	0	6	13	1
18266	ENSMUSG00000061207	Stk19	12953	0	1	0	7	15	1
7557	ENSMUSG00000029552	Tes	40680	0	1	0	23	48	1
418	ENSMUSG00000002459	Rgs20	160710	0	1	0	12	25	1
3810	ENSMUSG00000023036	Pcdhgc4	26795	0	1	0	16	32	1
11307	ENSMUSG00000041168	Lonp1	12591	0	1	0	16	32	1
8068	ENSMUSG00000031060	Rbm10	33399	0	1	0	14	28	1
14846	ENSMUSG00000054079	Utp18	26524	0	1	0	13	26	1
10079	ENSMUSG00000037287	Tbcel	95494	0	1	0	13	26	1
7922	ENSMUSG00000032253	Phip	109358	0	1	0	13	26	1
14239	ENSMUSG00000042364	Snx18	26386	0	1	0	12	24	1
1599	ENSMUSG00000011831	Evi5	130313	0	1	0	11	22	1
7219	ENSMUSG00000030255	Sspn	33583	0	1	0	9	18	1
20045	ENSMUSG00000075704	Txnrd2	52690	0	1	0	7	14	1
35970	ENSMUSG00000099282	Txnrd2	52690	0	1	0	7	14	1
6158	ENSMUSG00000026510	Trp53bp2	53261	0	1	0	6	12	1
4048	ENSMUSG00000022621	Rabl2	9391	0	1	0	6	12	1
572	ENSMUSG00000003437	Paf1	6438	0	1	0	6	12	1
8436	ENSMUSG00000031232	Magt1	43823	0	1	0	6	12	1
24702	ENSMUSG00000072294	Klf12	414048	0	1	0	3	6	1
13843	ENSMUSG00000046519	Golph3l	30314	0	1	0	3	6	1
11562	ENSMUSG00000039623	Ap5z1	14767	0	1	0	3	6	1
46626	ENSMUSG00000115018	AL732309.1	2045	0	1	0	3	6	1
16534	ENSMUSG00000063972	Nr6a1	204319	0	1	0	2	4	1
10885	ENSMUSG00000035407	Kank4	62640	0	1	0	2	4	1
4036	ENSMUSG00000022401	Xpnpep3	57345	0	1	0	1	2	1
22042	ENSMUSG00000073565	Prr16	302312	0	1	0	1	2	1
23384	ENSMUSG00000075394	Hoxc4	17919	0	1	0	1	2	1
3173	ENSMUSG00000021130	Galnt16	112696	0	1	0	1	2	1
546	ENSMUSG00000002221	Paxip1	51612	0	1	0	10	19	1
4549	ENSMUSG00000026279	Thap4	52930	0	1	0	19	36	1
11591	ENSMUSG00000040675	Mthfd1l	193964	0	1	0	9	17	1
8053	ENSMUSG00000032318	Isl2	7509	0	1	0	16	30	1
3505	ENSMUSG00000022801	Lrch3	101548	0	1	0	8	15	1
987	ENSMUSG00000006906	Stambp	29519	0	1	0	21	39	1
12098	ENSMUSG00000039046	Usp6nl	123724	0	1	0	7	13	1
13039	ENSMUSG00000046020	Pofut1	28715	0	1	0	7	13	1
1117	ENSMUSG00000004018	Fancl	85742	0	1	0	7	13	1
3343	ENSMUSG00000020284	1810043G02Rik	8382	0	1	0	18	33	1
15325	ENSMUSG00000055334	Snupn	32329	0	1	0	6	11	1
8017	ENSMUSG00000030630	Fah	21564	0	1	0	32	58	1
11435	ENSMUSG00000040490	Lrfn2	165210	0	1	0	10	18	1
406	ENSMUSG00000002413	Braf	122227	0	1	0	10	18	1
3894	ENSMUSG00000022019	Tdrd3	128866	0	1	0	29	52	1
8545	ENSMUSG00000031297	Slc7a3	6811	0	1	0	9	16	1
9951	ENSMUSG00000034212	Ankmy1	43104	0	1	0	9	16	1
4459	ENSMUSG00000022788	Fgd4	183633	0	1	0	13	23	1
12575	ENSMUSG00000044042	Fmn1	389032	0	1	0	8	14	1
5205	ENSMUSG00000025026	Add3	106957	0	1	0	23	40	1
17299	ENSMUSG00000060882	Kcnd2	514303	0	1	0	4	7	1
11718	ENSMUSG00000040724	Kcna2	13860	0	1	0	4	7	1
5958	ENSMUSG00000027457	Snph	42045	0	1	0	29	50	1
15817	ENSMUSG00000054021	Sirt5	29708	0	1	0	11	19	1
5692	ENSMUSG00000026737	Pip4k2a	155872	0	1	0	11	19	1
2476	ENSMUSG00000021044	Adck1	101171	0	1	0	11	19	1
12354	ENSMUSG00000040433	Zbtb38	70062	0	1	0	7	12	1
16322	ENSMUSG00000052137	Rbm12b2	6805	0	1	0	7	12	1
4779	ENSMUSG00000025764	Jade1	61134	0	1	0	7	12	1
6534	ENSMUSG00000026721	Rabgap1l	574038	0	1	0	30	51	1
53	ENSMUSG00000000275	Trim25	20918	0	1	0	10	17	1
4106	ENSMUSG00000022861	Dgkg	188761	0	1	0	10	17	1
18611	ENSMUSG00000062995	Ica1	147962	0	1	0	68	114	1
6752	ENSMUSG00000030284	Creld1	10047	0	1	0	34	57	1
2917	ENSMUSG00000020211	Sf3a2	6727	0	1	0	24	40	1
6013	ENSMUSG00000026858	Miga2	21289	0	1	0	15	25	1
14331	ENSMUSG00000048251	Bcl11b	93200	0	1	0	12	20	1
2285	ENSMUSG00000017418	Arl5b	33062	0	1	0	12	20	1
10346	ENSMUSG00000035835	Plppr3	14160	0	1	0	62	103	1
2794	ENSMUSG00000020718	Polg2	11285	0	1	0	6	10	1
8332	ENSMUSG00000030323	Ift122	73230	0	1	0	6	10	1
6604	ENSMUSG00000028085	Gatb	81504	0	1	0	6	10	1
2166	ENSMUSG00000018425	Dhx40	38901	0	1	0	6	10	1
7351	ENSMUSG00000029775	Klhdc10	53312	0	1	0	40	66	1
5283	ENSMUSG00000024941	Scyl1	13069	0	1	0	20	33	1
14727	ENSMUSG00000053877	Srcap	49237	0	1	0	3	5	1
18108	ENSMUSG00000067279	Ppp1r3c	4923	0	1	0	3	5	1
12536	ENSMUSG00000044229	Nxpe4	238003	0	1	0	3	5	1
1298	ENSMUSG00000014164	Klhl3	113365	0	1	0	3	5	1
24339	ENSMUSG00000074733	Zfp950	87001	0	1	0	17	28	1
3952	ENSMUSG00000022443	Myh9	81589	0	1	0	17	28	1
1631	ENSMUSG00000012076	Brms1l	33413	0	1	0	14	23	1
2175	ENSMUSG00000018189	Uchl5	30195	0	1	0	30	49	1
14326	ENSMUSG00000046556	Zfp319	8940	0	1	0	11	18	1
5815	ENSMUSG00000027634	Ndrg3	64712	0	1	0	19	31	1
1001	ENSMUSG00000004508	Gab2	227361	0	1	0	19	31	1
7041	ENSMUSG00000029420	Rimbp2	195696	0	1	0	8	13	1
14483	ENSMUSG00000047466	8030462N17Rik	82990	0	1	0	8	13	1
47572	ENSMUSG00000116473	8030462N17Rik	82990	0	1	0	8	13	1
12123	ENSMUSG00000041729	Coro2b	117553	0	1	0	21	34	1
5859	ENSMUSG00000027957	Slc35a3	43362	0	1	0	13	21	1
3065	ENSMUSG00000021111	Papola	54251	0	1	0	30	48	1
6705	ENSMUSG00000029246	Ppat	38330	0	1	0	22	35	1
4843	ENSMUSG00000024513	Mbd2	57943	0	1	0	22	35	1
12720	ENSMUSG00000042675	Ypel3	3560	0	1	0	38	60	1
12276	ENSMUSG00000038848	Ythdf1	16573	0	1	0	45	71	1
8903	ENSMUSG00000031728	Zfp821	19387	0	1	0	19	30	1
8196	ENSMUSG00000030733	Sh2b1	8431	0	1	0	26	41	1
11168	ENSMUSG00000038372	Gmds	519162	0	1	0	21	33	1
10234	ENSMUSG00000037570	Mcrs1	9145	0	1	0	37	58	1
17007	ENSMUSG00000063785	Utp14a	25592	0	1	0	7	11	1
12556	ENSMUSG00000042246	Tmc7	48896	0	1	0	7	11	1
3858	ENSMUSG00000024172	St6gal2	69200	0	1	0	7	11	1
30024	ENSMUSG00000098633	St6gal2	69200	0	1	0	7	11	1
4343	ENSMUSG00000022610	Mapk12	10120	0	1	0	7	11	1
12400	ENSMUSG00000041907	Gpr45	82585	0	1	0	43	67	1
3937	ENSMUSG00000024268	Celf4	276526	0	1	0	58	90	1
14706	ENSMUSG00000052372	Il1rapl1	1374776	0	1	0	9	14	1
7748	ENSMUSG00000029765	Plxna4	443925	0	1	0	31	48	1
25599	ENSMUSG00000071359	Tbpl1	28060	0	1	0	35	54	1
18569	ENSMUSG00000060314	Zfp941	14730	0	1	0	11	17	1
19363	ENSMUSG00000059323	Tonsl	13957	0	1	0	11	17	1
17132	ENSMUSG00000058587	Tmod3	61951	0	1	0	11	17	1
3792	ENSMUSG00000022112	Gpc5	1432965	0	1	0	11	17	1
5170	ENSMUSG00000025533	Asl	17990	0	1	0	30	46	1
14579	ENSMUSG00000045180	Shroom2	159957	0	1	0	32	49	1
6695	ENSMUSG00000028480	Glipr2	21718	0	1	0	19	29	1
9197	ENSMUSG00000032589	Bsn	94363	0	1	0	56	85	1
3870	ENSMUSG00000023723	Mrps23	7120	0	1	0	29	44	1
41433	ENSMUSG00000098375	Mrps23	7120	0	1	0	29	44	1
16358	ENSMUSG00000051149	Adnp	26127	0	1	0	53	80	1
12629	ENSMUSG00000044628	Rnf208	2008	0	1	0	42	63	1
6010	ENSMUSG00000027525	Phactr3	219518	0	1	0	26	39	1
538	ENSMUSG00000002325	Irf9	6460	0	1	0	20	30	1
10851	ENSMUSG00000035725	Prkx	34868	0	1	0	16	24	1
462	ENSMUSG00000001986	Gria3	277748	0	1	0	14	21	1
14652	ENSMUSG00000051730	Mettl5	14418	0	1	0	12	18	1
12373	ENSMUSG00000041112	Elmo1	517758	0	1	0	12	18	1
10578	ENSMUSG00000037490	Slc2a12	59275	0	1	0	8	12	1
13416	ENSMUSG00000045967	Gpr158	463006	0	1	0	8	12	1
6435	ENSMUSG00000027936	Crtc2	9963	0	1	0	8	12	1
4953	ENSMUSG00000024654	Asrgl1	25769	0	1	0	8	12	1
2583	ENSMUSG00000020214	Glipr1l2	24745	0	1	0	6	9	1
9622	ENSMUSG00000034066	Farp2	109898	0	1	0	6	9	1
15481	ENSMUSG00000050471	Fam118b	50841	0	1	0	6	9	1
7432	ENSMUSG00000028842	Ago3	97853	0	1	0	4	6	1
12325	ENSMUSG00000040549	Ckap5	93903	0	1	0	35	52	1
2490	ENSMUSG00000020456	Ogdh	65010	0	1	0	48	71	1
4852	ENSMUSG00000025427	Rnf165	109052	0	1	0	2	3	1
8084	ENSMUSG00000031925	Maml2	411432	0	1	0	2	3	1
17079	ENSMUSG00000067610	Klri1	19915	0	1	0	2	3	1
17999	ENSMUSG00000058624	Gda	82139	0	1	0	2	3	1
11256	ENSMUSG00000041147	Brca2	47700	0	1	0	2	3	1
10132	ENSMUSG00000037679	Inf2	26774	0	1	0	21	31	1
1576	ENSMUSG00000015357	Clpx	36399	0	1	0	19	28	1
12055	ENSMUSG00000039047	Pigk	266309	0	1	0	36	53	1
1945	ENSMUSG00000009621	Vav2	164930	0	1	0	17	25	1
17056	ENSMUSG00000062867	Impdh2	5299	0	1	0	45	66	1
6612	ENSMUSG00000026918	Brd3	62084	0	1	0	15	22	1
42534	ENSMUSG00000105103	Gm43191	39359	0	1	0	13	19	1
15968	ENSMUSG00000051705	Senp8	16452	0	1	0	11	16	1
24051	ENSMUSG00000075592	Nynrin	20727	0	1	0	11	16	1
5255	ENSMUSG00000025757	Hspa4l	51609	0	1	0	31	45	1
44701	ENSMUSG00000115951	Hspa4l	51609	0	1	0	31	45	1
8809	ENSMUSG00000030839	Sergef	196654	0	1	0	20	29	1
6538	ENSMUSG00000026640	Plxna2	198652	0	1	0	29	42	1
10408	ENSMUSG00000035629	Rubcn	56064	0	1	0	18	26	1
17043	ENSMUSG00000067430	Zfp763	16540	0	1	0	9	13	1
10877	ENSMUSG00000037847	Nmrk1	20479	0	1	0	9	13	1
15741	ENSMUSG00000057530	Ece1	102993	0	1	0	9	13	1
1675	ENSMUSG00000019146	Cacng2	128281	0	1	0	9	13	1
20383	ENSMUSG00000085795	Zfp703	4137	0	1	0	14	20	1
9332	ENSMUSG00000033773	Rpap2	64466	0	1	0	14	20	1
4577	ENSMUSG00000025220	Mgea5	33579	0	1	0	73	104	1
18637	ENSMUSG00000059142	Zfp945	20438	0	1	0	7	10	1
10126	ENSMUSG00000038172	Ttc39b	103956	0	1	0	7	10	1
7198	ENSMUSG00000030259	Rassf8	74332	0	1	0	7	10	1
3839	ENSMUSG00000022064	Pibf1	155070	0	1	0	7	10	1
31809	ENSMUSG00000094695	Gm21953	589	0	1	0	7	10	1
3186	ENSMUSG00000021703	Serinc5	100857	0	1	0	19	27	1
812	ENSMUSG00000004610	Etfb	13718	0	1	0	36	51	1
15074	ENSMUSG00000055214	Pld5	313007	0	1	0	70	99	1
22832	ENSMUSG00000075054	Yae1d1	12020	0	1	0	12	17	1
12867	ENSMUSG00000042389	Tsen2	33965	0	1	0	12	17	1
8157	ENSMUSG00000030706	Mrpl48	62551	0	1	0	51	72	1
7234	ENSMUSG00000028445	Enho	2181	0	1	0	95	134	1
6822	ENSMUSG00000028669	Pithd1	11805	0	1	0	27	38	1
10264	ENSMUSG00000038302	Afg1l	165981	0	1	0	47	66	1
3079	ENSMUSG00000020823	Sec14l1	44101	0	1	0	57	80	1
9122	ENSMUSG00000032502	Stac	128912	0	1	0	82	115	1
825	ENSMUSG00000004069	Dnaja3	67707	0	1	0	40	56	1
2007	ENSMUSG00000008730	Hipk1	51749	0	1	0	20	28	1
6119	ENSMUSG00000028385	Snx30	98898	0	1	0	15	21	1
11558	ENSMUSG00000038807	Rap1gap2	227560	0	1	0	15	21	1
12594	ENSMUSG00000044252	Osbpl1a	186528	0	1	0	53	74	1
3764	ENSMUSG00000022561	Gpaa1	3677	0	1	0	33	46	1
1077	ENSMUSG00000005501	Usp40	63433	0	1	0	5	7	1
23977	ENSMUSG00000079071	Gm14085	43100	0	1	0	5	7	1
1632	ENSMUSG00000017679	Ttpal	16700	0	1	0	28	39	1
4814	ENSMUSG00000025790	Slco3a1	279362	0	1	0	28	39	1
14519	ENSMUSG00000043670	Diras1	6074	0	1	0	28	39	1
40597	ENSMUSG00000091264	Smim13	26734	0	1	0	49	68	1
36954	ENSMUSG00000091306	Gm17606	7342	0	1	0	18	25	1
15143	ENSMUSG00000054676	1600014C10Rik	14352	0	1	0	18	25	1
5577	ENSMUSG00000027200	Sema6d	577802	0	1	0	31	43	1
6479	ENSMUSG00000027509	Rae1	15623	0	1	0	31	43	1
12033	ENSMUSG00000039611	Tmem246	13371	0	1	0	44	61	1
5890	ENSMUSG00000026889	Rbm18	20695	0	1	0	44	61	1
11773	ENSMUSG00000041570	Camsap2	77982	0	1	0	52	72	1
12538	ENSMUSG00000049044	Rapgef4	276235	0	1	0	39	54	1
5014	ENSMUSG00000024424	Ttc39c	138968	0	1	0	26	36	1
15565	ENSMUSG00000053799	Exoc6	133642	0	1	0	26	36	1
3208	ENSMUSG00000020260	Pofut2	10358	0	1	0	13	18	1
18601	ENSMUSG00000060166	Zdhhc8	14384	0	1	0	34	47	1
46663	ENSMUSG00000108733	Zdhhc8	14384	0	1	0	34	47	1
6949	ENSMUSG00000029012	Orc5	63945	0	1	0	55	76	1
9185	ENSMUSG00000034610	Tut4	99996	0	1	0	37	51	1
4947	ENSMUSG00000025287	Acot9	35212	0	1	0	45	62	1
9318	ENSMUSG00000033653	Vps8	221563	0	1	0	16	22	1
11470	ENSMUSG00000039230	Tbcd	165216	0	1	0	67	92	1
12994	ENSMUSG00000046605	B3gntl1	56957	0	1	0	8	11	1
9462	ENSMUSG00000034781	Gna11	16467	0	1	0	54	74	1
4473	ENSMUSG00000024776	Stambpl1	48105	0	1	0	27	37	1
713	ENSMUSG00000004633	Chn2	262257	0	1	0	79	108	1
1375	ENSMUSG00000020124	Usp15	91990	0	1	0	52	71	1
10457	ENSMUSG00000038576	Susd4	132732	0	1	0	52	71	1
1748	ENSMUSG00000013787	Ehmt2	15584	0	1	0	52	71	1
12066	ENSMUSG00000040688	Tbl3	9712	0	1	0	22	30	1
10755	ENSMUSG00000036606	Plxnb2	25240	0	1	0	11	15	1
6967	ENSMUSG00000028788	Ptp4a2	38785	0	1	0	92	125	1
4081	ENSMUSG00000023025	Larp4	46294	0	1	0	39	53	1
3278	ENSMUSG00000020537	Drg2	14164	0	1	0	42	57	1
2912	ENSMUSG00000020948	Klhl28	26702	0	1	0	14	19	1
14319	ENSMUSG00000045767	B230219D22Rik	10377	0	1	0	63	85	1
1730	ENSMUSG00000019470	Xab2	12896	0	1	0	26	35	1
2050	ENSMUSG00000017376	Nlk	130206	0	1	0	80	107	1
12986	ENSMUSG00000048307	Ankrd46	19153	0	1	0	108	144	1
3924	ENSMUSG00000023068	Nus1	22637	0	1	0	33	44	1
15596	ENSMUSG00000055817	Mta3	115354	0	1	0	21	28	1
13587	ENSMUSG00000043323	Fbrsl1	86750	0	1	0	18	24	1
11399	ENSMUSG00000039488	Cntn5	1243885	0	1	0	18	24	1
10188	ENSMUSG00000038369	Ncoa6	83239	0	1	0	12	16	1
1420	ENSMUSG00000011960	Ccnt1	32235	0	1	0	12	16	1
9438	ENSMUSG00000034083	Ccdc174	21791	0	1	0	12	16	1
10302	ENSMUSG00000037224	Zfyve28	93557	0	1	0	9	12	1
11462	ENSMUSG00000040339	Fam102b	56611	0	1	0	85	113	1
20020	ENSMUSG00000070047	Fat1	116811	0	1	0	6	8	1
7501	ENSMUSG00000029283	Cdc7	20111	0	1	0	6	8	1
4144	ENSMUSG00000022477	Aco2	42825	0	1	0	162	215	1
9261	ENSMUSG00000033059	Pygb	45024	0	1	0	107	142	1
8824	ENSMUSG00000032328	Tmem30a	24565	0	1	0	101	134	1
20882	ENSMUSG00000074215	Gm10643	1577	0	1	0	3	4	1
1259	ENSMUSG00000016493	Cd46	55424	0	1	0	3	4	1
2219	ENSMUSG00000007944	Ttc9b	3432	0	1	0	190	251	1
33212	ENSMUSG00000095362	Gm14325	8546	0	1	0	28	37	1
17983	ENSMUSG00000061032	Rrp1	12660	0	1	0	69	91	1
21312	ENSMUSG00000071660	Ttc9c	10259	0	1	0	22	29	1
12239	ENSMUSG00000040836	Gpr161	30957	0	1	0	22	29	1
13314	ENSMUSG00000042729	Wdr74	4798	0	1	0	54	71	1
12205	ENSMUSG00000039860	Srrm3	67883	0	1	0	19	25	1
10304	ENSMUSG00000038014	Fam120a	88799	0	1	0	32	42	1
15725	ENSMUSG00000051401	Kctd16	274669	0	1	0	16	21	1
15033	ENSMUSG00000056158	Car10	503722	0	1	0	16	21	1
12184	ENSMUSG00000040712	Camta2	18643	0	1	0	16	21	1
10127	ENSMUSG00000035960	Apex1	2172	0	1	0	45	59	1
10480	ENSMUSG00000036644	Tbc1d9b	41390	0	1	0	71	93	1
2442	ENSMUSG00000021149	Gtpbp4	29753	0	1	0	26	34	1
18946	ENSMUSG00000062151	Unc13c	489545	0	1	0	13	17	1
14144	ENSMUSG00000042133	Ppig	31468	0	1	0	23	30	1
33947	ENSMUSG00000102748	Pcdhgb2	152046	0	1	0	23	30	1
18010	ENSMUSG00000059811	Atl2	47734	0	1	0	23	30	1
8345	ENSMUSG00000030850	Ate1	128877	0	1	0	23	30	1
16785	ENSMUSG00000062198	2700097O09Rik	34450	0	1	0	23	30	1
192	ENSMUSG00000001383	Zmat2	5791	0	1	0	60	78	1
5950	ENSMUSG00000026790	Odf2	42526	0	1	0	40	52	1
15095	ENSMUSG00000056124	B4galt6	61806	0	1	0	30	39	1
8251	ENSMUSG00000030591	Psmd8	6514	0	1	0	117	152	1
7779	ENSMUSG00000031714	Gab1	116082	0	1	0	20	26	1
11174	ENSMUSG00000035969	Rusc2	45110	0	1	0	91	118	1
612	ENSMUSG00000003623	Crot	31292	0	1	0	81	105	1
1281	ENSMUSG00000019843	Fyn	196527	0	1	0	44	57	1
5708	ENSMUSG00000026825	Dnm1	44868	0	1	0	78	101	1
7665	ENSMUSG00000029245	Epha5	362622	0	1	0	109	141	1
11032	ENSMUSG00000038077	Kcna6	32346	0	1	0	116	150	1
24356	ENSMUSG00000078622	Ccdc47	18937	0	1	0	41	53	1
4630	ENSMUSG00000024427	Spry4	15169	0	1	0	45	58	1
15811	ENSMUSG00000051343	Rab11fip5	39673	0	1	0	42	54	1
8092	ENSMUSG00000031799	Tpm4	18168	0	1	0	28	36	1
15990	ENSMUSG00000049932	H2afx	1384	0	1	0	21	27	1
927	ENSMUSG00000005699	Pard6a	2349	0	1	0	14	18	1
33576	ENSMUSG00000099083	Atf7	99519	0	1	0	14	18	1
6869	ENSMUSG00000029772	Ahcyl2	144300	0	1	0	14	18	1
3142	ENSMUSG00000021823	Vcl	104279	0	1	0	46	59	1
7393	ENSMUSG00000028864	Hgf	66658	0	1	0	7	9	1
16217	ENSMUSG00000050910	Cdr2l	14217	0	1	0	39	50	1
10037	ENSMUSG00000037316	Bag4	20750	0	1	0	32	41	1
395	ENSMUSG00000003235	Eif2b5	10507	0	1	0	68	87	1
26144	ENSMUSG00000078652	Psme3	7325	0	1	0	79	101	1
41554	ENSMUSG00000103442	Pcdha1	257478	0	1	0	69	88	1
401	ENSMUSG00000002379	Ndufa11	4375	0	1	0	280	357	1
19919	ENSMUSG00000079197	Psme2	3673	0	1	0	33	42	1
9600	ENSMUSG00000034912	Mdga2	756490	0	1	0	11	14	1
35760	ENSMUSG00000089717	Olfr275	13666	0	1	0	165	209	1
9717	ENSMUSG00000033430	Terf2ip	9131	0	1	0	60	76	1
5019	ENSMUSG00000024962	Vegfb	5179	0	1	0	45	57	1
13546	ENSMUSG00000044433	Camsap3	21783	0	1	0	45	57	1
13379	ENSMUSG00000048915	Efna5	277134	0	1	0	15	19	1
1073	ENSMUSG00000006800	Sulf2	82575	0	1	0	49	62	1
7850	ENSMUSG00000031729	Ist1	21936	0	1	0	34	43	1
8412	ENSMUSG00000030806	Stx1b	20650	0	1	0	80	101	1
11516	ENSMUSG00000041203	Trir	3464	0	1	0	103	130	1
14732	ENSMUSG00000049878	Rlf	69712	0	1	0	19	24	1
36055	ENSMUSG00000103088	Pcdhgb6	99780	0	1	0	19	24	1
347	ENSMUSG00000002658	Gtf2f1	7884	0	1	0	42	53	1
9321	ENSMUSG00000034259	Exosc4	3281	0	1	0	42	53	1
4991	ENSMUSG00000026249	Serpine2	66984	0	1	0	230	290	1
14379	ENSMUSG00000042626	Shc1	11585	0	1	0	27	34	1
6201	ENSMUSG00000027540	Ptpn1	47329	0	1	0	27	34	1
5132	ENSMUSG00000024668	Sdhaf2	25609	0	1	0	31	39	1
10283	ENSMUSG00000038486	Sv2a	14371	0	1	0	86	108	1
14982	ENSMUSG00000051375	Pcdh1	26140	0	1	0	43	54	1
3526	ENSMUSG00000022516	Nudt16l1	2272	0	1	0	51	64	1
625	ENSMUSG00000006095	Tbcb	8142	0	1	0	193	242	1
3831	ENSMUSG00000022456	Sept3	19682	0	1	0	63	79	1
1833	ENSMUSG00000016349	Eef1a2	9362	0	1	0	209	262	1
11234	ENSMUSG00000041730	Prrxl1	49840	0	1	0	68	85	1
6847	ENSMUSG00000028530	Jak1	112916	0	1	0	56	70	1
4403	ENSMUSG00000022105	Rb1	142150	0	1	0	44	55	1
15108	ENSMUSG00000055745	Rtl6	4426	0	1	0	24	30	1
14658	ENSMUSG00000054720	Lrrc8c	93631	0	1	0	24	30	1
6206	ENSMUSG00000026563	Tada1	14525	0	1	0	20	25	1
11781	ENSMUSG00000039850	Endov	20091	0	1	0	16	20	1
10034	ENSMUSG00000038602	Slc35f1	421090	0	1	0	12	15	1
11886	ENSMUSG00000041258	Zfp236	99291	0	1	0	8	10	1
2905	ENSMUSG00000021224	Numb	127901	0	1	0	8	10	1
5703	ENSMUSG00000027678	Ncoa3	80607	0	1	0	8	10	1
24764	ENSMUSG00000079450	Cldn34c1	85301	0	1	0	8	10	1
11616	ENSMUSG00000038770	Kpna7	100512	0	1	0	4	5	1
342	ENSMUSG00000002578	Ikzf4	15149	0	1	0	4	5	1
8241	ENSMUSG00000031342	Gpm6b	150078	0	1	0	4	5	1
4487	ENSMUSG00000025010	Ccnj	17294	0	1	0	4	5	1
3444	ENSMUSG00000022106	Rcbtb2	84807	0	1	0	45	56	1
561	ENSMUSG00000002083	Bbc3	9813	0	1	0	41	51	1
12927	ENSMUSG00000044533	Rps2	3814	0	1	0	161	200	1
11712	ENSMUSG00000040610	Tlx3	2838	0	1	0	66	82	1
522	ENSMUSG00000002660	Clpp	5884	0	1	0	66	82	1
5298	ENSMUSG00000024642	Tle4	149902	0	1	0	58	72	1
7994	ENSMUSG00000031360	Ctps2	131271	0	1	0	29	36	1
9316	ENSMUSG00000033793	Atp6v1h	92512	0	1	0	158	196	1
3944	ENSMUSG00000024220	Zfp523	28758	0	1	0	25	31	1
12125	ENSMUSG00000041765	Ubac2	142415	0	1	0	25	31	1
11700	ENSMUSG00000040570	Rundc3b	132619	0	1	0	25	31	1
7903	ENSMUSG00000031672	Got2	24414	0	1	0	227	281	1
7864	ENSMUSG00000030653	Gm45837	101934	0	1	0	63	78	1
3847	ENSMUSG00000022995	Enah	123607	0	1	0	42	52	1
5994	ENSMUSG00000028291	Akirin2	15972	0	1	0	80	99	1
11517	ENSMUSG00000041057	Wdr43	43137	0	1	0	21	26	1
973	ENSMUSG00000005034	Prkacb	83417	0	1	0	93	115	1
19399	ENSMUSG00000058600	Rpl30	3136	0	1	0	157	194	1
18407	ENSMUSG00000063245	Zfp993	47200	0	1	0	13	16	1
18526	ENSMUSG00000063108	Zfp26	31714	0	1	0	13	16	1
12397	ENSMUSG00000048668	Rhno1	5912	0	1	0	13	16	1
605	ENSMUSG00000006599	Gtf2h1	27698	0	1	0	75	92	1
11279	ENSMUSG00000041737	Tmem45b	38267	0	1	0	22	27	1
3676	ENSMUSG00000022175	Lrp10	7361	0	1	0	31	38	1
3132	ENSMUSG00000020307	Cdc34	6204	0	1	0	67	82	1
5017	ENSMUSG00000025982	Sf3b1	42313	0	1	0	63	77	1
10445	ENSMUSG00000035919	Bbs9	412566	0	1	0	27	33	1
3621	ENSMUSG00000022185	Acin1	44771	0	1	0	27	33	1
23840	ENSMUSG00000071477	Zfp777	24724	0	1	0	18	22	1
11247	ENSMUSG00000041238	Rbbp8	111946	0	1	0	18	22	1
490	ENSMUSG00000002280	Narfl	9557	0	1	0	18	22	1
17637	ENSMUSG00000061232	H2-K1	4331	0	1	0	9	11	1
22618	ENSMUSG00000074991	Gabrr3	57173	0	1	0	9	11	1
8637	ENSMUSG00000030861	Acadsb	38344	0	1	0	9	11	1
4738	ENSMUSG00000025738	Fbxl16	12171	0	1	0	41	50	1
34296	ENSMUSG00000091537	Tma7	8020	0	1	0	124	151	1
7299	ENSMUSG00000030189	Ybx3	23622	0	1	0	92	112	1
33849	ENSMUSG00000103567	Pcdhga5	147494	0	1	0	23	28	1
49179	ENSMUSG00000110195	Pde2a	91137	0	1	0	60	73	1
21159	ENSMUSG00000069520	Tmem19	22828	0	1	0	37	45	1
14479	ENSMUSG00000042410	Agps	99174	0	1	0	37	45	1
16084	ENSMUSG00000051855	Mest	24919	0	1	0	65	79	1
27592	ENSMUSG00000079677	Fdx1l	6095	0	1	0	28	34	1
1614	ENSMUSG00000009112	Bcl2l13	56631	0	1	0	28	34	1
3555	ENSMUSG00000024142	Mlst8	5528	0	1	0	14	17	1
6898	ENSMUSG00000029821	Gsdme	74975	0	1	0	14	17	1
18696	ENSMUSG00000059518	Znhit1	5858	0	1	0	61	74	1
7709	ENSMUSG00000029752	Asns	18086	0	1	0	240	291	1
7427	ENSMUSG00000030123	Plxnd1	40195	0	1	0	33	40	1
26933	ENSMUSG00000071076	Jund	1668	0	1	0	233	282	1
52199	ENSMUSG00000110974	Jund	1668	0	1	0	233	282	1
15550	ENSMUSG00000056692	D17Wsu92e	69414	0	1	0	57	69	1
385	ENSMUSG00000003344	Btbd2	14455	0	1	0	105	127	1
3453	ENSMUSG00000023826	Prkn	1222978	0	1	0	43	52	1
3037	ENSMUSG00000020778	Ten1	16464	0	1	0	24	29	1
15849	ENSMUSG00000057649	Brd9	23085	0	1	0	24	29	1
237	ENSMUSG00000001707	Eef1e1	14852	0	1	0	111	134	1
10623	ENSMUSG00000036913	Trim67	41622	0	1	0	34	41	1
8546	ENSMUSG00000031029	Eif3f	8535	0	1	0	190	229	1
16513	ENSMUSG00000062760	Shisal1	67895	0	1	0	54	65	1
10564	ENSMUSG00000035314	Gdpd5	80464	0	1	0	54	65	1
16354	ENSMUSG00000054752	Fsd1l	75539	0	1	0	54	65	1
16111	ENSMUSG00000056222	Spock1	487138	0	1	0	129	155	1
3532	ENSMUSG00000022677	Fopnl	18162	0	1	0	60	72	1
2704	ENSMUSG00000021819	Zswim8	16068	0	1	0	40	48	1
4059	ENSMUSG00000022962	Gart	25767	0	1	0	40	48	1
14714	ENSMUSG00000050321	Neto1	111767	0	1	0	20	24	1
3918	ENSMUSG00000023921	Mut	27304	0	1	0	15	18	1
5908	ENSMUSG00000026577	Blzf1	17690	0	1	0	15	18	1
7311	ENSMUSG00000028945	Rheb	39802	0	1	0	131	157	1
7602	ENSMUSG00000028648	Ndufs5	5493	0	1	0	222	266	1
120	ENSMUSG00000000753	Serpinf1	12933	0	1	0	207	248	1
4384	ENSMUSG00000022438	Parvb	83646	0	1	0	76	91	1
13798	ENSMUSG00000045917	Tmem268	27577	0	1	0	5	6	1
1978	ENSMUSG00000017615	Tnfaip1	13483	0	1	0	51	61	1
3377	ENSMUSG00000021772	Nkiras1	12868	0	1	0	51	61	1
4040	ENSMUSG00000022661	Cd200	26919	0	1	0	123	147	1
11353	ENSMUSG00000039768	Dnajc11	48447	0	1	0	41	49	1
15958	ENSMUSG00000056342	Usp34	183666	0	1	0	77	92	1
11230	ENSMUSG00000038539	Atf5	4403	0	1	0	165	197	1
7833	ENSMUSG00000031754	Nudt21	21536	0	1	0	67	80	1
5521	ENSMUSG00000025337	Sbds	9800	0	1	0	31	37	1
16233	ENSMUSG00000049807	Arhgap23	86870	0	1	0	31	37	1
19002	ENSMUSG00000059005	Hnrnpa3	10147	0	1	0	125	149	1
10913	ENSMUSG00000036501	Fam13b	64481	0	1	0	26	31	1
19384	ENSMUSG00000060147	Serpinb6a	84877	0	1	0	272	324	1
3090	ENSMUSG00000021039	Snw1	23200	0	1	0	68	81	1
12179	ENSMUSG00000040265	Dnm3	495582	0	1	0	21	25	1
19739	ENSMUSG00000081534	Slc48a1	14173	0	1	0	58	69	1
9418	ENSMUSG00000034810	Scn7a	111490	0	1	0	80	95	1
1848	ENSMUSG00000018001	Cyth3	87804	0	1	0	48	57	1
3729	ENSMUSG00000024354	Slc23a1	12641	0	1	0	16	19	1
4493	ENSMUSG00000025130	P4hb	12956	0	1	0	118	140	1
10917	ENSMUSG00000037933	Bicd2	45442	0	1	0	27	32	1
449	ENSMUSG00000002102	Psmc3	12361	0	1	0	163	193	1
6128	ENSMUSG00000027487	Cdk5rap1	37631	0	1	0	38	45	1
4092	ENSMUSG00000022476	Polr3h	38013	0	1	0	202	239	1
2230	ENSMUSG00000016833	Mrps18c	5845	0	1	0	66	78	1
5198	ENSMUSG00000025207	Sema4g	14297	0	1	0	22	26	1
13087	ENSMUSG00000048578	Mlec	15199	0	1	0	50	59	1
9018	ENSMUSG00000034220	Gpc1	29135	0	1	0	67	79	1
3362	ENSMUSG00000020230	Prmt2	30644	0	1	0	73	86	1
4987	ENSMUSG00000025318	Jph3	64654	0	1	0	73	86	1
5753	ENSMUSG00000027506	Tpd52	79131	0	1	0	225	265	1
3809	ENSMUSG00000022636	Alcam	205079	0	1	0	107	126	1
11878	ENSMUSG00000041263	Rusc1	9331	0	1	0	85	100	1
13818	ENSMUSG00000043079	Synpo	66170	0	1	0	17	20	1
716	ENSMUSG00000007476	Lrrc8a	26076	0	1	0	17	20	1
2887	ENSMUSG00000021012	Zc3h14	40790	0	1	0	57	67	1
2123	ENSMUSG00000014771	Pdcd2	8094	0	1	0	69	81	1
398	ENSMUSG00000002833	Hdgfl2	20974	0	1	0	23	27	1
11858	ENSMUSG00000039523	Cep104	33539	0	1	0	23	27	1
10945	ENSMUSG00000038141	Tmem181a	51455	0	1	0	58	68	1
4307	ENSMUSG00000022658	Tagln3	13379	0	1	0	263	308	1
12155	ENSMUSG00000040044	Orc3	44149	0	1	0	35	41	1
13638	ENSMUSG00000046079	Lrrc8d	132468	0	1	0	526	615	1
19324	ENSMUSG00000061477	Rps7	5100	0	1	0	149	174	1
823	ENSMUSG00000005698	Ctcf	46355	0	1	0	489	571	1
2974	ENSMUSG00000020889	Nr1d1	7402	0	1	0	102	119	1
8234	ENSMUSG00000030688	Stard10	29541	0	1	0	72	84	1
31659	ENSMUSG00000103092	Pcdha5	227218	0	1	0	54	63	1
3477	ENSMUSG00000023087	Noct	27198	0	1	0	24	28	1
13689	ENSMUSG00000044098	Rsbn1	52517	0	1	0	18	21	1
11396	ENSMUSG00000041415	Dicer1	64211	0	1	0	18	21	1
16056	ENSMUSG00000052681	Rap1b	32165	0	1	0	181	211	1
4873	ENSMUSG00000024978	Gpam	59971	0	1	0	12	14	1
11209	ENSMUSG00000036103	Colec12	175050	0	1	0	12	14	1
4363	ENSMUSG00000022863	Btg3	44556	0	1	0	12	14	1
15159	ENSMUSG00000049804	Armcx4	10239	0	1	0	12	14	1
15127	ENSMUSG00000057541	Pus7	43064	0	1	0	6	7	1
18449	ENSMUSG00000058006	Mdn1	118099	0	1	0	6	7	1
13655	ENSMUSG00000047414	Flrt2	92990	0	1	0	6	7	1
19296	ENSMUSG00000059187	Fam19a1	544045	0	1	0	6	7	1
1624	ENSMUSG00000017288	Vps53	133422	0	1	0	49	57	1
10206	ENSMUSG00000035437	Rabgap1	123176	0	1	0	49	57	1
25548	ENSMUSG00000070319	Eif3g	4275	0	1	0	142	165	1
27875	ENSMUSG00000074102	Rbm15b	6511	0	1	0	37	43	1
17225	ENSMUSG00000058756	Thra	28369	0	1	0	311	361	1
7178	ENSMUSG00000028466	Creb3	4729	0	1	0	75	87	1
3624	ENSMUSG00000022412	Mief1	19354	0	1	0	25	29	1
17524	ENSMUSG00000061762	Tac1	10956	0	1	0	668	774	1
7676	ENSMUSG00000030161	Gabarapl1	9187	0	1	0	133	154	1
8866	ENSMUSG00000030652	Coq7	23698	0	1	0	38	44	1
6456	ENSMUSG00000026933	Camsap1	56445	0	1	0	38	44	1
1471	ENSMUSG00000009741	Ubp1	46269	0	1	0	19	22	1
12837	ENSMUSG00000049659	Aftph	56506	0	1	0	19	22	1
16041	ENSMUSG00000051579	Tceal8	3359	0	1	0	70	81	1
17308	ENSMUSG00000060261	Gtf2i	76927	0	1	0	70	81	1
8067	ENSMUSG00000031791	Tmem38a	15228	0	1	0	64	74	1
1182	ENSMUSG00000008305	Tle1	83778	0	1	0	32	37	1
2263	ENSMUSG00000019877	Serinc1	16757	0	1	0	469	542	1
7696	ENSMUSG00000029836	Cbx3	13345	0	1	0	122	141	1
3888	ENSMUSG00000022761	Lztr1	17646	0	1	0	84	97	1
3641	ENSMUSG00000023495	Pcbp4	10722	0	1	0	117	135	1
48196	ENSMUSG00000114133	Gm20075	2161	0	1	0	78	90	1
7644	ENSMUSG00000029918	Mrps33	9185	0	1	0	52	60	1
13743	ENSMUSG00000043719	Col6a6	140352	0	1	0	39	45	1
705	ENSMUSG00000006010	Odr4	31776	0	1	0	26	30	1
10743	ENSMUSG00000036180	Gatad2a	89309	0	1	0	26	30	1
2998	ENSMUSG00000021244	Ylpm1	74195	0	1	0	13	15	1
831	ENSMUSG00000006527	Sfmbt1	107873	0	1	0	13	15	1
22926	ENSMUSG00000070056	Mfhas1	91652	0	1	0	13	15	1
12697	ENSMUSG00000048388	Fam171b	70851	0	1	0	72	83	1
45895	ENSMUSG00000103800	Pcdha8	195287	0	1	0	46	53	1
5947	ENSMUSG00000027907	S100a11	5800	0	1	0	112	129	1
2578	ENSMUSG00000020917	Acly	51648	0	1	0	159	183	1
8554	ENSMUSG00000030643	Rab30	102933	0	1	0	20	23	1
9662	ENSMUSG00000032913	Lrig2	115501	0	1	0	20	23	1
15165	ENSMUSG00000054309	Cpsf3	29666	0	1	0	20	23	1
9231	ENSMUSG00000034656	Cacna1a	251807	0	1	0	20	23	1
9837	ENSMUSG00000034868	Myl12b	17758	0	1	0	201	231	1
13006	ENSMUSG00000047260	Emc6	1519	0	1	0	74	85	1
6956	ENSMUSG00000028937	Acot7	93722	0	1	0	542	622	1
4984	ENSMUSG00000026254	Eif4e2	26575	0	1	0	88	101	1
14315	ENSMUSG00000042688	Mapk6	40944	0	1	0	34	39	1
14877	ENSMUSG00000055302	Mrfap1	1906	0	1	0	205	235	1
6824	ENSMUSG00000028409	Smu1	21382	0	1	0	48	55	1
114	ENSMUSG00000000787	Ddx3x	13083	0	1	0	124	142	1
18124	ENSMUSG00000058254	Tspan7	111448	0	1	0	138	158	1
10468	ENSMUSG00000037373	Ctbp1	27272	0	1	0	214	245	1
2824	ENSMUSG00000021877	Arf4	27011	0	1	0	159	182	1
45741	ENSMUSG00000115861	Arf4	27011	0	1	0	159	182	1
8853	ENSMUSG00000031703	Itfg1	123344	0	1	0	347	397	1
15189	ENSMUSG00000054452	Aes	6875	0	1	0	573	655	1
657	ENSMUSG00000005779	Psmb4	2869	0	1	0	267	305	1
15199	ENSMUSG00000052656	Rnf103	16988	0	1	0	21	24	1
10575	ENSMUSG00000037652	Phc3	70045	0	1	0	14	16	1
7018	ENSMUSG00000029413	Naaa	20512	0	1	0	14	16	1
8801	ENSMUSG00000031246	Sh3bgrl	102509	0	1	0	79	90	1
5564	ENSMUSG00000028347	Tmeff1	77958	0	1	0	217	247	1
14638	ENSMUSG00000056999	Ide	69110	0	1	0	760	865	1
1687	ENSMUSG00000009394	Syn2	147105	0	1	0	44	50	1
6443	ENSMUSG00000027858	Tspan2	66985	0	1	0	59	67	1
9415	ENSMUSG00000033392	Clasp2	178210	0	1	0	89	101	1
10599	ENSMUSG00000038482	Tfdp1	39698	0	1	0	45	51	1
396	ENSMUSG00000003226	Ranbp2	47437	0	1	0	30	34	1
17313	ENSMUSG00000063524	Eno1	12159	0	1	0	739	837	1
40613	ENSMUSG00000089774	Slc5a3	29152	0	1	0	15	17	1
8869	ENSMUSG00000030621	Me3	221968	0	1	0	15	17	1
10202	ENSMUSG00000036499	Eea1	104869	0	1	0	15	17	1
604	ENSMUSG00000006373	Pgrmc1	7874	0	1	0	167	189	1
17438	ENSMUSG00000062234	Gak	60345	0	1	0	38	43	1
14198	ENSMUSG00000049606	Zfp644	80549	0	1	0	23	26	1
5508	ENSMUSG00000025995	Wdr75	28454	0	1	0	23	26	1
16341	ENSMUSG00000051367	Six1	13873	0	1	0	23	26	1
10998	ENSMUSG00000038502	Ptov1	6722	0	1	0	162	183	1
8820	ENSMUSG00000031584	Gsr	45641	0	1	0	62	70	1
5479	ENSMUSG00000025204	Ndufb8	6869	0	1	0	439	495	1
14031	ENSMUSG00000043831	Lysmd4	84787	0	1	0	47	53	1
11215	ENSMUSG00000038535	Zfp280d	88918	0	1	0	150	169	1
7636	ENSMUSG00000028692	Akr1a1	15171	0	1	0	494	556	1
4448	ENSMUSG00000022031	Elp3	62627	0	1	0	48	54	1
3282	ENSMUSG00000020184	Mdm2	21884	0	1	0	40	45	1
6784	ENSMUSG00000029422	Rsrc2	20989	0	1	0	32	36	1
6256	ENSMUSG00000027612	Mmp24	43025	0	1	0	32	36	1
12794	ENSMUSG00000049680	Urgcp	48960	0	1	0	24	27	1
11632	ENSMUSG00000040472	Rabggta	6848	0	1	0	24	27	1
14394	ENSMUSG00000049536	Tceal1	3497	0	1	0	16	18	1
9451	ENSMUSG00000035172	Plekhh3	8673	0	1	0	16	18	1
11776	ENSMUSG00000041650	Pcca	356777	0	1	0	16	18	1
5214	ENSMUSG00000025571	Tnrc6c	109151	0	1	0	8	9	1
19230	ENSMUSG00000068184	Ndufaf2	155909	0	1	0	57	64	1
7747	ENSMUSG00000029712	Actl6b	16066	0	1	0	74	83	1
28170	ENSMUSG00000103332	Pcdhga2	172918	0	1	0	33	37	1
10730	ENSMUSG00000037499	Nenf	11406	0	1	0	83	93	1
5644	ENSMUSG00000026915	Strbp	220632	0	1	0	100	112	1
29078	ENSMUSG00000102918	Pcdhgc3	35510	0	1	0	25	28	1
7754	ENSMUSG00000028479	Gne	50103	0	1	0	25	28	1
45621	ENSMUSG00000111624	Ide	69110	0	1	0	773	865	1
801	ENSMUSG00000005716	Pvalb	15287	0	1	0	135	151	1
11934	ENSMUSG00000041028	Ghitm	15181	0	1	0	170	190	1
1780	ENSMUSG00000020070	Rufy2	36988	0	1	0	68	76	1
9580	ENSMUSG00000034708	Grn	6734	0	1	0	34	38	1
1179	ENSMUSG00000018559	Ctdnep1	9446	0	1	0	34	38	1
6763	ENSMUSG00000029713	Gnb2	5384	0	1	0	418	467	1
9288	ENSMUSG00000034453	Polr3b	104887	0	1	0	17	19	1
6127	ENSMUSG00000026473	Glul	9780	0	1	0	17	19	1
24284	ENSMUSG00000071708	Sms	48433	0	1	0	77	86	1
18635	ENSMUSG00000058586	Serhl	27169	0	1	0	26	29	1
11021	ENSMUSG00000037386	Rims2	486112	0	1	0	26	29	1
11658	ENSMUSG00000040596	Pogk	25242	0	1	0	61	68	1
7209	ENSMUSG00000029777	Gars	41494	0	1	0	245	273	1
2410	ENSMUSG00000021273	Fdft1	34429	0	1	0	175	195	1
744	ENSMUSG00000005354	Txn2	13960	0	1	0	79	88	1
7042	ENSMUSG00000029711	Epo	50223	0	1	0	448	498	1
14318	ENSMUSG00000042506	Usp22	23271	0	1	0	251	279	1
48018	ENSMUSG00000118193	Arhgap26	433817	0	1	0	126	140	1
7428	ENSMUSG00000029020	Mfn2	31106	0	1	0	81	90	1
536	ENSMUSG00000002812	Flii	13141	0	1	0	45	50	1
12548	ENSMUSG00000046873	Mbtps2	63345	0	1	0	27	30	1
15665	ENSMUSG00000051451	Crebzf	5266	0	1	0	18	20	1
9094	ENSMUSG00000034349	Smc4	29886	0	1	0	9	10	1
6519	ENSMUSG00000028033	Kcnq5	563540	0	1	0	128	142	1
13196	ENSMUSG00000046157	Tmem229b	45833	0	1	0	64	71	1
18087	ENSMUSG00000058351	Smim4	40825	0	1	0	46	51	1
2731	ENSMUSG00000021929	Kpna3	74664	0	1	0	46	51	1
1006	ENSMUSG00000006356	Crip2	5271	0	1	0	545	604	1
7918	ENSMUSG00000031971	Ccsap	19379	0	1	0	416	461	1
9920	ENSMUSG00000032536	Trak1	177417	0	1	0	102	113	1
26836	ENSMUSG00000074088	Snrnp40	29895	0	1	0	28	31	1
51534	ENSMUSG00000106911	Snrnp40	29895	0	1	0	28	31	1
22495	ENSMUSG00000073755	5730409E04Rik	4554	0	1	0	28	31	1
2416	ENSMUSG00000020840	Blmh	62571	0	1	0	85	94	1
1773	ENSMUSG00000011752	Pgam1	6738	0	1	0	426	471	1
22120	ENSMUSG00000074781	Ube2n	30513	0	1	0	180	199	1
10158	ENSMUSG00000037259	Dzank1	56858	0	1	0	38	42	1
3318	ENSMUSG00000020869	Lrrc59	15450	0	1	0	107	118	1
10549	ENSMUSG00000036046	5031439G07Rik	44616	0	1	0	39	43	1
5929	ENSMUSG00000026623	Lpgat1	66422	0	1	0	49	54	1
15600	ENSMUSG00000050192	Eif5a2	17571	0	1	0	49	54	1
14582	ENSMUSG00000042682	Selenok	7355	0	1	0	158	174	1
16722	ENSMUSG00000067847	Romo1	1759	0	1	0	158	174	1
13821	ENSMUSG00000048644	Ctxn1	1615	0	1	0	288	317	1
5520	ENSMUSG00000026234	Ncl	14682	0	1	0	160	176	1
3252	ENSMUSG00000020530	Ggnbp2	38457	0	1	0	50	55	1
7123	ENSMUSG00000029787	Avl9	47014	0	1	0	30	33	1
12520	ENSMUSG00000042772	Smg7	65652	0	1	0	20	22	1
5467	ENSMUSG00000025646	Atrip	16192	0	1	0	20	22	1
455	ENSMUSG00000002820	Atg4d	12480	0	1	0	20	22	1
20928	ENSMUSG00000073433	Arhgdig	8604	0	1	0	323	355	1
903	ENSMUSG00000003518	Dusp3	15871	0	1	0	71	78	1
6276	ENSMUSG00000026878	Rab14	20916	0	1	0	123	135	1
3908	ENSMUSG00000022051	Bnip3l	23639	0	1	0	82	90	1
5090	ENSMUSG00000024583	Txnl1	47708	0	1	0	113	124	1
8450	ENSMUSG00000032207	Lipc	154099	0	1	0	72	79	1
14341	ENSMUSG00000045411	2410002F23Rik	5598	0	1	0	72	79	1
2679	ENSMUSG00000020163	Uqcr11	3834	0	1	0	239	262	1
14274	ENSMUSG00000047528	Als2cr12	49087	0	1	0	84	92	1
12920	ENSMUSG00000049421	Zfp260	12846	0	1	0	21	23	1
10997	ENSMUSG00000037217	Syn1	60494	0	1	0	159	174	1
10396	ENSMUSG00000037553	Zdhhc18	44856	0	1	0	106	116	1
11206	ENSMUSG00000037805	Rpl10a	2563	0	1	0	512	560	1
19819	ENSMUSG00000070544	Top1	76877	0	1	0	32	35	1
53535	ENSMUSG00000111410	Gm49337	126458	0	1	0	54	59	1
1762	ENSMUSG00000018293	Pfn1	2795	0	1	0	498	544	1
5527	ENSMUSG00000024939	Fam89b	1567	0	1	0	184	201	1
3038	ENSMUSG00000020198	Ap3d1	35309	0	1	0	98	107	1
3909	ENSMUSG00000024335	Brd2	10612	0	1	0	109	119	1
18941	ENSMUSG00000063160	Numbl	23712	0	1	0	33	36	1
5901	ENSMUSG00000028107	Tars2	20231	0	1	0	22	24	1
2996	ENSMUSG00000020205	Phlda1	2360	0	1	0	78	85	1
13076	ENSMUSG00000042258	Isl1	11409	0	1	0	78	85	1
7253	ENSMUSG00000029550	Sppl3	87654	0	1	0	56	61	1
7486	ENSMUSG00000029757	Dync1i1	302401	0	1	0	101	110	1
8380	ENSMUSG00000031144	Syp	14786	0	1	0	292	318	1
5662	ENSMUSG00000027642	Rpn2	47303	0	1	0	135	147	1
1449	ENSMUSG00000017724	Etv4	15630	0	1	0	135	147	1
5346	ENSMUSG00000025034	Trim8	15147	0	1	0	45	49	1
1302	ENSMUSG00000016319	Slc25a5	3157	0	1	0	306	333	1
1619	ENSMUSG00000017843	Ppp2r5c	135943	0	1	0	91	99	1
3141	ENSMUSG00000020519	Sap30l	8581	0	1	0	80	87	1
3108	ENSMUSG00000021109	Hif1a	46156	0	1	0	46	50	1
36922	ENSMUSG00000102543	Pcdhgc5	22361	0	1	0	23	25	1
3560	ENSMUSG00000024242	Map4k3	147974	0	1	0	23	25	1
9831	ENSMUSG00000032560	Dnajc13	111649	0	1	0	23	25	1
1443	ENSMUSG00000014767	Tbp	28492	0	1	0	82	89	1
6039	ENSMUSG00000027088	Phospho2	10383	0	1	0	308	334	1
11724	ENSMUSG00000041607	Mbp	110492	0	1	0	83	90	1
4592	ENSMUSG00000024474	Ik	12984	0	1	0	72	78	1
2542	ENSMUSG00000021991	Cacna2d3	816922	0	1	0	72	78	1
17231	ENSMUSG00000062006	Rpl34	3568	0	1	0	435	471	1
4075	ENSMUSG00000023994	Nfya	23022	0	1	0	12	13	1
51065	ENSMUSG00000115906	Nfya	23022	0	1	0	12	13	1
3105	ENSMUSG00000020807	4933427D14Rik	53531	0	1	0	12	13	1
6282	ENSMUSG00000028300	C9orf72	34891	0	1	0	1305	1412	1
56295	ENSMUSG00000116930	Gm49711	129026	0	1	0	62	67	1
2227	ENSMUSG00000019795	Pcmt1	51764	0	1	0	150	162	1
44249	ENSMUSG00000116405	Pcmt1	51764	0	1	0	150	162	1
11287	ENSMUSG00000040594	Ranbp17	301952	0	1	0	25	27	1
9340	ENSMUSG00000033735	Spr	7591	0	1	0	63	68	1
13915	ENSMUSG00000043017	Ptgir	4416	0	1	0	63	68	1
6672	ENSMUSG00000028568	Btf3l4	19320	0	1	0	89	96	1
7363	ENSMUSG00000028609	Magoh	7670	0	1	0	51	55	1
5308	ENSMUSG00000025485	Ric8a	7416	0	1	0	141	152	1
1056	ENSMUSG00000004364	Cul3	75558	0	1	0	90	97	1
793	ENSMUSG00000005683	Cs	24746	0	1	0	246	265	1
1864	ENSMUSG00000020086	H2afy2	45483	0	1	0	52	56	1
17004	ENSMUSG00000063801	Ap3s2	45325	0	1	0	52	56	1
8938	ENSMUSG00000033585	Ndn	3694	0	1	0	548	590	1
15376	ENSMUSG00000051495	Irf2bp2	5691	0	1	0	26	28	1
16255	ENSMUSG00000049800	Sertad2	109769	0	1	0	13	14	1
15309	ENSMUSG00000051098	Mblac2	41935	0	1	0	79	85	1
6704	ENSMUSG00000030126	Tmcc1	174876	0	1	0	120	129	1
12360	ENSMUSG00000039221	Rpl22l1	1989	0	1	0	40	43	1
12228	ENSMUSG00000041702	Btbd7	97675	0	1	0	268	288	1
18828	ENSMUSG00000062825	Actg1	2853	0	1	0	3813	4097	1
41057	ENSMUSG00000093904	Tomm20	15178	0	1	0	202	217	1
3448	ENSMUSG00000022108	Itm2b	23064	0	1	0	310	333	1
8066	ENSMUSG00000031622	Sin3b	34917	0	1	0	135	145	1
5129	ENSMUSG00000026017	Carf	55707	0	1	0	433	465	1
11443	ENSMUSG00000041268	Dmxl2	136469	0	1	0	27	29	1
12704	ENSMUSG00000048027	Rgmb	27852	0	1	0	123	132	1
11991	ENSMUSG00000041351	Rap1gap	65136	0	1	0	55	59	1
1312	ENSMUSG00000009030	Pdcl	9259	0	1	0	42	45	1
15721	ENSMUSG00000051652	Lrrc3	4962	0	1	0	28	30	1
3385	ENSMUSG00000020167	Tcf3	24134	0	1	0	14	15	1
61	ENSMUSG00000000282	Mnt	14806	0	1	0	14	15	1
7540	ENSMUSG00000028910	Mecr	24317	0	1	0	14	15	1
12882	ENSMUSG00000044066	Cep68	22393	0	1	0	14	15	1
474	ENSMUSG00000003131	Pafah1b2	49832	0	1	0	172	184	1
13319	ENSMUSG00000041977	Arhgef11	120476	0	1	0	172	184	1
6159	ENSMUSG00000027852	Nras	9630	0	1	0	72	77	1
2594	ENSMUSG00000020844	Nxn	141943	0	1	0	130	139	1
1205	ENSMUSG00000007836	Hnrnpa0	2678	0	1	0	150	160	1
37117	ENSMUSG00000090619	Vmn2r60	88439	0	1	0	120	128	1
1063	ENSMUSG00000004789	Dlst	24013	0	1	0	105	112	1
10810	ENSMUSG00000037149	Ddx1	32241	0	1	0	90	96	1
10241	ENSMUSG00000038127	Ccdc50	63350	0	1	0	60	64	1
7346	ENSMUSG00000030257	Srgap3	229296	0	1	0	30	32	1
9812	ENSMUSG00000033039	Micall1	28003	0	1	0	30	32	1
5673	ENSMUSG00000027993	Trim2	146439	0	1	0	196	209	1
3399	ENSMUSG00000021546	Hnrnpk	12202	0	1	0	318	339	1
6395	ENSMUSG00000027808	Serp1	6076	0	1	0	61	65	1
1690	ENSMUSG00000016637	Ift27	14645	0	1	0	61	65	1
3951	ENSMUSG00000022044	Stmn4	17385	0	1	0	92	98	1
14920	ENSMUSG00000053024	Cntn2	33830	0	1	0	46	49	1
22038	ENSMUSG00000070953	Rabepk	22357	0	1	0	31	33	1
8999	ENSMUSG00000032745	Gpbp1	64432	0	1	0	31	33	1
11377	ENSMUSG00000041594	Tmtc4	65065	0	1	0	47	50	1
1884	ENSMUSG00000017686	Rhot1	58889	0	1	0	47	50	1
10208	ENSMUSG00000035863	Palm	27325	0	1	0	252	268	1
12295	ENSMUSG00000041773	Enc1	11930	0	1	0	286	304	1
8695	ENSMUSG00000031167	Rbm3	6906	0	1	0	464	493	1
9028	ENSMUSG00000033615	Cplx1	31471	0	1	0	336	357	1
1740	ENSMUSG00000019478	Rab4a	29303	0	1	0	64	68	1
5864	ENSMUSG00000027531	Impa1	19484	0	1	0	48	51	1
8667	ENSMUSG00000030852	Tacc2	187348	0	1	0	32	34	1
6376	ENSMUSG00000027671	Actl6a	20676	0	1	0	16	17	1
3098	ENSMUSG00000021395	Spin1	51667	0	1	0	98	104	1
80	ENSMUSG00000000308	Ckmt1	6024	0	1	0	149	158	1
4440	ENSMUSG00000023033	Scn8a	176081	0	1	0	17	18	1
13149	ENSMUSG00000046634	Pkd1l1	146559	0	1	0	17	18	1
163	ENSMUSG00000001441	Npepps	74797	0	1	0	69	73	1
102	ENSMUSG00000000743	Chmp1a	8500	0	1	0	607	642	1
1033	ENSMUSG00000003814	Calr	5085	0	1	0	157	166	1
5240	ENSMUSG00000025040	Fundc1	15762	0	1	0	35	37	1
9929	ENSMUSG00000033029	1700088E04Rik	11905	0	1	0	35	37	1
2373	ENSMUSG00000020326	Ccng1	6760	0	1	0	581	614	1
1334	ENSMUSG00000018012	Rac3	2500	0	1	0	160	169	1
5718	ENSMUSG00000027030	Stk39	261824	0	1	0	92	97	1
12217	ENSMUSG00000039828	Wdr70	226155	0	1	0	523	551	1
3052	ENSMUSG00000021559	Dapk1	161245	0	1	0	467	492	1
16210	ENSMUSG00000055239	Kcmf1	58866	0	1	0	131	138	1
3235	ENSMUSG00000020267	Hint1	4119	0	1	0	658	693	1
7923	ENSMUSG00000031104	Rab33a	10948	0	1	0	38	40	1
2862	ENSMUSG00000021218	Gdi2	29809	0	1	0	287	302	1
1212	ENSMUSG00000018501	Ncor1	142116	0	1	0	39	41	1
27905	ENSMUSG00000078249	Hmga1b	1626	0	1	0	59	62	1
2551	ENSMUSG00000021024	Psma6	34233	0	1	0	696	731	1
6739	ENSMUSG00000028861	Mrps15	8608	0	1	0	80	84	1
3946	ENSMUSG00000023175	Bsg	7479	0	1	0	461	484	1
3798	ENSMUSG00000022340	Sybu	116208	0	1	0	40	42	1
3519	ENSMUSG00000024277	Mapre2	141529	0	1	0	181	190	1
11183	ENSMUSG00000037563	Rps16	2504	0	1	0	484	508	1
8912	ENSMUSG00000030669	Calca	4880	0	1	0	446	468	1
1721	ENSMUSG00000007815	Rhoa	31806	0	1	0	205	215	1
997	ENSMUSG00000006456	Rbm14	11066	0	1	0	41	43	1
3982	ENSMUSG00000022419	Deptor	146955	0	1	0	41	43	1
8087	ENSMUSG00000030763	Lcmt1	60575	0	1	0	83	87	1
2426	ENSMUSG00000021102	Glrx5	10219	0	1	0	125	131	1
2335	ENSMUSG00000018507	Trpv2	26030	0	1	0	21	22	1
10676	ENSMUSG00000037907	Ankrd13b	19194	0	1	0	149	156	1
15407	ENSMUSG00000050565	Tor1aip2	33459	0	1	0	64	67	1
4635	ENSMUSG00000024587	Nars	17006	0	1	0	129	135	1
10807	ENSMUSG00000038429	Usp5	14466	0	1	0	108	113	1
10200	ENSMUSG00000036620	Mgat4b	24214	0	1	0	152	159	1
6633	ENSMUSG00000026499	Acbd3	28162	0	1	0	22	23	1
993	ENSMUSG00000006024	Napa	19518	0	1	0	158	165	1
7240	ENSMUSG00000028961	Pgd	16781	0	1	0	68	71	1
13530	ENSMUSG00000042302	Ehbp1	336465	0	1	0	23	24	1
4925	ENSMUSG00000025899	Alkbh8	56015	0	1	0	23	24	1
10709	ENSMUSG00000036833	Pnpla7	78025	0	1	0	725	756	1
12322	ENSMUSG00000040731	Eif4h	19770	0	1	0	188	196	1
4928	ENSMUSG00000026229	Psmd1	74765	0	1	0	71	74	1
8317	ENSMUSG00000030518	Fam189a1	400480	0	1	0	71	74	1
10982	ENSMUSG00000036792	Mbd5	375898	0	1	0	786	819	1
8003	ENSMUSG00000031545	Gpat4	37082	0	1	0	49	51	1
1377	ENSMUSG00000018428	Akap1	33795	0	1	0	25	26	1
17260	ENSMUSG00000067038	Rps12-ps3	494	0	1	0	739	768	1
2180	ENSMUSG00000018040	Rrp7a	9369	0	1	0	78	81	1
1277	ENSMUSG00000010025	Aldh3a2	44048	0	1	0	26	27	1
18918	ENSMUSG00000062014	Gmfb	14094	0	1	0	132	137	1
1959	ENSMUSG00000019923	Zwint	20120	0	1	0	295	306	1
776	ENSMUSG00000005299	Letm1	43145	0	1	0	941	976	1
18302	ENSMUSG00000068290	Ddrgk1	10700	0	1	0	27	28	1
12929	ENSMUSG00000045273	Cenph	16226	0	1	0	82	85	1
6913	ENSMUSG00000030000	Add2	95729	0	1	0	84	87	1
174	ENSMUSG00000000827	Tpd52l2	20825	0	1	0	56	58	1
12224	ENSMUSG00000040648	Ppip5k2	64364	0	1	0	56	58	1
6934	ENSMUSG00000029029	Wrap73	25049	0	1	0	143	148	1
7440	ENSMUSG00000029068	Ccnl2	12055	0	1	0	29	30	1
2981	ENSMUSG00000020532	Acaca	271980	0	1	0	29	30	1
29364	ENSMUSG00000096472	Cdkn2d	2998	0	1	0	118	122	1
26046	ENSMUSG00000072694	1500011B03Rik	15273	0	1	0	208	215	1
1665	ENSMUSG00000019302	Atp6v0a1	54268	0	1	0	150	155	1
4311	ENSMUSG00000024181	Mrpl28	3114	0	1	0	60	62	1
12823	ENSMUSG00000046711	Hmga1	7178	0	1	0	60	62	1
4063	ENSMUSG00000024096	Ralbp1	37381	0	1	0	30	31	1
3320	ENSMUSG00000021314	Amph	202717	0	1	0	63	65	1
3205	ENSMUSG00000021959	Lats2	68727	0	1	0	32	33	1
19082	ENSMUSG00000066037	Hnrnpr	48506	0	1	0	32	33	1
4957	ENSMUSG00000024873	Cnih2	5654	0	1	0	130	134	1
16432	ENSMUSG00000056665	Them6	3436	0	1	0	98	101	1
5595	ENSMUSG00000028152	Tspan5	165711	0	1	0	66	68	1
2661	ENSMUSG00000021271	Zfp839	19744	0	1	0	272	280	1
752	ENSMUSG00000005533	Igf1r	280842	0	1	0	34	35	1
5424	ENSMUSG00000025754	Agbl1	894812	0	1	0	70	72	1
2479	ENSMUSG00000021051	Ppp2r5e	145365	0	1	0	35	36	1
14192	ENSMUSG00000042750	Bex2	1673	0	1	0	492	506	1
9339	ENSMUSG00000033475	Tomm6	1741	0	1	0	184	189	1
6939	ENSMUSG00000029616	Erp29	23917	0	1	0	112	115	1
8285	ENSMUSG00000032297	Celf6	29376	0	1	0	38	39	1
37532	ENSMUSG00000095595	Fam177a	17636	0	1	0	115	118	1
16710	ENSMUSG00000058569	Tmed9	23966	0	1	0	77	79	1
3053	ENSMUSG00000021288	Klc1	48996	0	1	0	641	657	1
5924	ENSMUSG00000028351	Brinp1	192884	0	1	0	42	43	1
1544	ENSMUSG00000017466	Timp2	54672	0	1	0	296	303	1
5730	ENSMUSG00000027309	4930402H24Rik	200207	0	1	0	43	44	1
2243	ENSMUSG00000018677	Slc25a39	4962	0	1	0	132	135	1
629	ENSMUSG00000006998	Psmd2	11763	0	1	0	225	230	1
50214	ENSMUSG00000114046	Gm49321	30723	0	1	0	45	46	1
10428	ENSMUSG00000038290	Smg6	238626	0	1	0	272	278	1
32853	ENSMUSG00000092074	Dynlt1a	11161	0	1	0	611	624	1
1405	ENSMUSG00000019124	Scrn1	65317	0	1	0	96	98	1
5026	ENSMUSG00000025350	Rdh5	9296	0	1	0	48	49	1
14009	ENSMUSG00000042428	Mgat3	41799	0	1	0	51	52	1
15914	ENSMUSG00000052632	Asap2	279713	0	1	0	52	53	1
14558	ENSMUSG00000046034	Otulin	88059	0	1	0	54	55	1
11914	ENSMUSG00000039108	Lsm14b	10479	0	1	0	54	55	1
4372	ENSMUSG00000023861	Mpc1	14758	0	1	0	271	276	1
2856	ENSMUSG00000020952	Scfd1	72592	0	1	0	55	56	1
19219	ENSMUSG00000067288	Rps28	5536	0	1	0	343	349	1
34262	ENSMUSG00000094103	1700047I17Rik2	17577	0	1	0	115	117	1
5985	ENSMUSG00000027303	Ptpra	105847	0	1	0	117	119	1
16452	ENSMUSG00000058655	Eif4b	23401	0	1	0	59	60	1
534	ENSMUSG00000002332	Dhrs1	6671	0	1	0	60	61	1
11932	ENSMUSG00000039680	Mrps6	53958	0	1	0	62	63	1
36609	ENSMUSG00000095677	Dynlt1f	9299	0	1	0	590	599	1
13307	ENSMUSG00000043716	Rpl7	3368	0	1	0	533	541	1
9329	ENSMUSG00000032507	Fbxl2	82555	0	1	0	70	71	1
16278	ENSMUSG00000055421	Pcdh9	877270	0	1	0	71	72	1
17254	ENSMUSG00000060860	Ube2s	18045	0	1	0	147	149	1
13105	ENSMUSG00000044083	Efcab8	64821	0	1	0	149	151	1
85	ENSMUSG00000000579	Dynlt1c	8104	0	1	0	589	596	1
16769	ENSMUSG00000061904	Slc25a3	7486	0	1	0	527	533	1
4366	ENSMUSG00000022564	Grina	3141	0	1	0	178	180	1
3361	ENSMUSG00000020361	Hspa4	40644	0	1	0	89	90	1
14731	ENSMUSG00000053465	Hs6st3	731475	0	1	0	90	91	1
13257	ENSMUSG00000043388	Tmem130	25904	0	1	0	91	92	1
5618	ENSMUSG00000027624	Epb41l1	122306	0	1	0	91	92	1
30847	ENSMUSG00000095041	AC149090.1	7501	0	1	0	107	108	1
6863	ENSMUSG00000028451	1700022I11Rik	14037	0	1	0	109	110	1
7248	ENSMUSG00000029390	Tmed2	9812	0	1	0	132	133	1
28588	ENSMUSG00000096255	Dynlt1b	6185	0	1	0	587	591	1
8389	ENSMUSG00000032181	Scg3	40868	0	1	0	193	194	1
5044	ENSMUSG00000025781	Atp5c1	24495	0	1	0	283	284	1
41163	ENSMUSG00000090247	Bloc1s1	6154	0	1	0	69	69	1
5447	ENSMUSG00000024983	Vti1a	311015	0	1	0	32	32	1
9244	ENSMUSG00000032902	Slc16a1	19795	0	1	0	18	18	1
7879	ENSMUSG00000031647	Mfap3l	43903	0	1	0	16	16	1
11290	ENSMUSG00000040167	Ikzf5	21870	0	1	0	16	16	1
26448	ENSMUSG00000078578	Ube2d3	30050	0	1	0	286	286	1
14453	ENSMUSG00000047879	Usp14	52054	0	1	0	184	184	1
890	ENSMUSG00000006262	Mob1b	43366	0	1	0	172	172	1
3344	ENSMUSG00000020477	Mrps24	11698	0	1	0	118	118	1
10281	ENSMUSG00000038128	Camk4	256298	0	1	0	84	84	1
9818	ENSMUSG00000034674	Tdg	20972	0	1	0	68	68	1
1968	ENSMUSG00000018848	Rars	26126	0	1	0	67	67	1
1917	ENSMUSG00000020015	Cdk17	106197	0	1	0	58	58	1
4179	ENSMUSG00000022075	Rhobtb2	20647	0	1	0	54	54	1
15916	ENSMUSG00000054142	Vmn1r236	11066	0	1	0	48	48	1
6069	ENSMUSG00000027193	Api5	26455	0	1	0	48	48	1
1871	ENSMUSG00000007817	Zmiz1	207559	0	1	0	46	46	1
1187	ENSMUSG00000009291	Pttg1ip	17013	0	1	0	46	46	1
1222	ENSMUSG00000008435	Rdh13	20880	0	1	0	40	40	1
11013	ENSMUSG00000037605	Adgrl3	804996	0	1	0	34	34	1
2220	ENSMUSG00000014601	Strip1	19163	0	1	0	33	33	1
12172	ENSMUSG00000040407	Akap9	153257	0	1	0	29	29	1
11631	ENSMUSG00000039428	Tmem135	264509	0	1	0	28	28	1
16049	ENSMUSG00000057193	Slc44a2	34331	0	1	0	28	28	1
11135	ENSMUSG00000035696	Rnf38	107580	0	1	0	28	28	1
17216	ENSMUSG00000062203	Gspt1	35034	0	1	0	23	23	1
3588	ENSMUSG00000022718	Dgcr8	35299	0	1	0	23	23	1
49378	ENSMUSG00000106687	Dgcr8	35299	0	1	0	23	23	1
40908	ENSMUSG00000103472	Pcdhga7	127110	0	1	0	20	20	1
34534	ENSMUSG00000101523	Gm10031	2653	0	1	0	20	20	1
9847	ENSMUSG00000034613	Ppm1h	267034	0	1	0	17	17	1
7354	ENSMUSG00000028698	Pik3r3	81439	0	1	0	15	15	1
17314	ENSMUSG00000066568	Lsm14a	48670	0	1	0	15	15	1
7578	ENSMUSG00000029141	Slc4a1ap	29938	0	1	0	12	12	1
7656	ENSMUSG00000028637	Ccdc30	92629	0	1	0	12	12	1
15051	ENSMUSG00000053141	Ptprt	1139158	0	1	0	11	11	1
7821	ENSMUSG00000032352	Lrrc1	114048	0	1	0	11	11	1
5227	ENSMUSG00000025332	Kdm5c	41516	0	1	0	11	11	1
28089	ENSMUSG00000095234	Gm21586	589	0	1	0	10	10	1
13128	ENSMUSG00000042390	Gatad2b	70230	0	1	0	10	10	1
43933	ENSMUSG00000109493	Gm45208	8286	0	1	0	9	9	1
14344	ENSMUSG00000049164	Zfp518a	23243	0	1	0	8	8	1
8432	ENSMUSG00000030671	Pde3b	123971	0	1	0	8	8	1
18944	ENSMUSG00000058979	Hdhd5	21826	0	1	0	8	8	1
18439	ENSMUSG00000061544	Zfp229	38548	0	1	0	7	7	1
15882	ENSMUSG00000055137	Sugct	838082	0	1	0	7	7	1
13966	ENSMUSG00000044250	Pced1b	138574	0	1	0	7	7	1
8184	ENSMUSG00000031609	Sap30	5154	0	1	0	6	6	1
537	ENSMUSG00000002250	Ppard	68775	0	1	0	6	6	1
5770	ENSMUSG00000027983	Cyp2u1	14787	0	1	0	6	6	1
42336	ENSMUSG00000116063	Cyp2u1	14787	0	1	0	6	6	1
6455	ENSMUSG00000028226	Mmp16	266253	0	1	0	5	5	1
9570	ENSMUSG00000032937	Fshr	215724	0	1	0	5	5	1
658	ENSMUSG00000004668	Abca13	492318	0	1	0	5	5	1
13019	ENSMUSG00000044617	Zbtb39	7812	0	1	0	4	4	1
3562	ENSMUSG00000023908	Pkmyt1	10400	0	1	0	4	4	1
3574	ENSMUSG00000024052	Lpin2	67258	0	1	0	4	4	1
25456	ENSMUSG00000079038	D130040H23Rik	43128	0	1	0	3	3	1
2847	ENSMUSG00000020388	Pdlim4	14087	0	1	0	2	2	1
11627	ENSMUSG00000041119	Pde9a	90101	0	1	0	2	2	1
12946	ENSMUSG00000047409	Ctdspl	117546	0	1	0	2	2	1
14865	ENSMUSG00000054453	Sytl5	108922	0	1	0	0	0	1
26660	ENSMUSG00000071342	Lsmem1	23998	0	1	0	0	0	1
1738	ENSMUSG00000009545	Kcnq1	320681	0	1	0	0	0	1
19203	ENSMUSG00000061482	Hist1h4d	1138	0	1	0	0	0	1
2201	ENSMUSG00000008734	Gprc5b	23165	0	1	0	0	0	1
441	ENSMUSG00000003420	Fcgrt	10862	0	1	0	0	0	1
12885	ENSMUSG00000043873	Chil5	15896	0	1	0	0	0	1
5151	ENSMUSG00000024989	Cep55	19413	0	1	0	0	0	1
7931	ENSMUSG00000030682	Cdipt	4588	0	1	0	155	155	1
14942	ENSMUSG00000052040	Klf13	52565	0	1	0	49	49	1
509	ENSMUSG00000001761	Smo	25863	0	1	0	1	1	1
171	ENSMUSG00000001029	Icam2	10420	0	1	0	1	1	1
4438	ENSMUSG00000022808	Snx4	48828	0	1	0	100	100	1
18232	ENSMUSG00000058672	Tubb2a	3734	0	1	0	1498	1496	1
761	ENSMUSG00000005575	Ube2m	3156	0	1	0	346	345	1
6551	ENSMUSG00000027797	Dclk1	296705	0	1	0	135	134	1
4949	ENSMUSG00000024767	Otub1	8115	0	1	0	248	246	1
17447	ENSMUSG00000060904	Arl1	13237	0	1	0	99	98	1
1952	ENSMUSG00000012405	Rpl15	3569	0	1	0	549	542	1
4710	ENSMUSG00000024403	Atp6v1g2	5108	0	1	0	71	70	1
8082	ENSMUSG00000031299	Pdha1	16205	0	1	0	194	191	1
25031	ENSMUSG00000071172	Srsf3	10746	0	1	0	127	125	1
4737	ENSMUSG00000025478	Dpysl4	16704	0	1	0	62	61	1
51496	ENSMUSG00000111393	Dpysl4	16704	0	1	0	62	61	1
6663	ENSMUSG00000029530	Ccr9	105892	0	1	0	185	182	1
15174	ENSMUSG00000057554	Lgals8	25530	0	1	0	61	60	1
1925	ENSMUSG00000013663	Pten	68664	0	1	0	183	180	1
4745	ENSMUSG00000024576	Csnk1a1	34788	0	1	0	241	237	1
8610	ENSMUSG00000031751	Amfr	41255	0	1	0	109	107	1
4466	ENSMUSG00000024359	Hspa9	16944	0	1	0	241	236	1
30246	ENSMUSG00000093674	Rpl41	1192	0	1	0	2016	1974	1
3915	ENSMUSG00000024095	Hnrnpll	32848	0	1	0	47	46	1
6204	ENSMUSG00000028180	Zranb2	14251	0	1	0	46	45	1
2608	ENSMUSG00000021036	Sptlc2	83298	0	1	0	45	44	1
12701	ENSMUSG00000048799	Cep120	62886	0	1	0	45	44	1
5291	ENSMUSG00000024758	Rtn3	57381	0	1	0	533	521	1
4417	ENSMUSG00000024082	Ndufaf7	10917	0	1	0	44	43	1
5843	ENSMUSG00000026427	Eif2d	34478	0	1	0	44	43	1
5603	ENSMUSG00000028367	Txn1	13039	0	1	0	296	289	1
7498	ENSMUSG00000029581	Fscn1	12843	0	1	0	380	371	1
14373	ENSMUSG00000048520	Fbxl13	161788	0	1	0	294	287	1
11926	ENSMUSG00000038717	Atp5l	8186	0	1	0	292	285	1
435	ENSMUSG00000002981	Clptm1	33463	0	1	0	83	81	1
28809	ENSMUSG00000089945	Pakap	328804	0	1	0	41	40	1
1536	ENSMUSG00000019996	Map7	133120	0	1	0	803	783	1
8012	ENSMUSG00000032050	Rdx	41563	0	1	0	40	39	1
17466	ENSMUSG00000059995	Atxn7l3	7332	0	1	0	79	77	1
1189	ENSMUSG00000019790	Stxbp5	145533	0	1	0	39	38	1
17103	ENSMUSG00000063179	Pstk	23342	0	1	0	39	38	1
16575	ENSMUSG00000062683	Atp5g2	9489	0	1	0	156	152	1
8517	ENSMUSG00000031532	Saraf	16247	0	1	0	193	188	1
8397	ENSMUSG00000031807	Pgls	8917	0	1	0	150	146	1
1448	ENSMUSG00000013921	Clip3	16640	0	1	0	150	146	1
197	ENSMUSG00000001158	Snrnp27	9372	0	1	0	37	36	1
862	ENSMUSG00000005161	Prdx2	5248	0	1	0	709	689	1
6570	ENSMUSG00000026999	Nup35	41671	0	1	0	283	275	1
2499	ENSMUSG00000021139	Gm20498	174046	0	1	0	139	135	1
2078	ENSMUSG00000011589	Fsd1	10373	0	1	0	69	67	1
15489	ENSMUSG00000056536	Pign	145256	0	1	0	103	100	1
314	ENSMUSG00000002489	Tiam1	356659	0	1	0	34	33	1
15499	ENSMUSG00000050088	1600012H06Rik	16387	0	1	0	34	33	1
7910	ENSMUSG00000030554	Synm	29583	0	1	0	99	96	1
17100	ENSMUSG00000059734	Ndufs8	3912	0	1	0	127	123	1
31429	ENSMUSG00000102312	Pcdha3	241553	0	1	0	62	60	1
1074	ENSMUSG00000005732	Ranbp1	8949	0	1	0	184	178	1
37921	ENSMUSG00000099164	Ranbp1	8949	0	1	0	184	178	1
14589	ENSMUSG00000041959	S100a10	9564	0	1	0	626	605	1
5443	ENSMUSG00000025917	Cops5	13568	0	1	0	206	199	1
11755	ENSMUSG00000041617	Ccdc74a	4269	0	1	0	29	28	1
11941	ENSMUSG00000039275	Foxk2	49907	0	1	0	58	56	1
14401	ENSMUSG00000048814	Lonrf2	43067	0	1	0	57	55	1
7548	ENSMUSG00000028443	Nudt2	15776	0	1	0	28	27	1
6185	ENSMUSG00000027312	Atrn	123839	0	1	0	28	27	1
10101	ENSMUSG00000037300	Ttc13	50652	0	1	0	56	54	1
10636	ENSMUSG00000035394	Cfap53	76897	0	1	0	389	375	1
11778	ENSMUSG00000040699	Limd2	4605	0	1	0	53	51	1
18165	ENSMUSG00000061518	Cox5b	2233	0	1	0	610	587	1
5294	ENSMUSG00000025340	Rabgef1	42545	0	1	0	289	278	1
15502	ENSMUSG00000053219	Raet1e	215571	0	1	0	131	126	1
8262	ENSMUSG00000031309	Rps6ka3	157938	0	1	0	26	25	1
14435	ENSMUSG00000044017	Adgrd1	107850	0	1	0	775	745	1
6294	ENSMUSG00000027099	Mtx2	52629	0	1	0	103	99	1
5596	ENSMUSG00000027206	Cops2	28836	0	1	0	77	74	1
13154	ENSMUSG00000048264	Dip2c	392401	0	1	0	51	49	1
3953	ENSMUSG00000024091	Vapa	35229	0	1	0	277	266	1
6343	ENSMUSG00000026662	Sephs1	28994	0	1	0	25	24	1
14042	ENSMUSG00000042719	Naa25	46443	0	1	0	25	24	1
15934	ENSMUSG00000055839	Elob	4399	0	1	0	581	557	1
5977	ENSMUSG00000026430	Rassf5	68849	0	1	0	24	23	1
2639	ENSMUSG00000021824	Ap3m1	21067	0	1	0	72	69	1
9177	ENSMUSG00000032803	Cdv3	12747	0	1	0	167	160	1
8645	ENSMUSG00000031166	Wdr13	9592	0	1	0	71	68	1
8813	ENSMUSG00000031137	Fgf13	505927	0	1	0	304	291	1
5192	ENSMUSG00000025066	Sfr1	3907	0	1	0	70	67	1
13339	ENSMUSG00000048852	Gm12185	87571	0	1	0	93	89	1
5181	ENSMUSG00000025243	Slc6a20b	41766	0	1	0	23	22	1
2948	ENSMUSG00000020701	Tmem132e	57433	0	1	0	45	43	1
4512	ENSMUSG00000025240	Sacm1l	62842	0	1	0	45	43	1
6902	ENSMUSG00000028760	Eif4g3	215487	0	1	0	45	43	1
4837	ENSMUSG00000026112	Coa5	13020	0	1	0	45	43	1
9923	ENSMUSG00000034336	Ina	10630	0	1	0	89	85	1
545	ENSMUSG00000003316	Glg1	104796	0	1	0	22	21	1
2378	ENSMUSG00000021481	Zfp346	29515	0	1	0	21	20	1
5274	ENSMUSG00000026153	Fam135a	89249	0	1	0	21	20	1
11816	ENSMUSG00000041297	Cdk13	94783	0	1	0	21	20	1
7545	ENSMUSG00000028745	Capzb	98920	0	1	0	252	240	1
16006	ENSMUSG00000050965	Prkca	410542	0	1	0	41	39	1
1710	ENSMUSG00000015222	Map2	267311	0	1	0	81	77	1
2945	ENSMUSG00000020453	Patz1	20210	0	1	0	20	19	1
1705	ENSMUSG00000015002	Efr3a	86783	0	1	0	20	19	1
12455	ENSMUSG00000042594	Sh2b3	22159	0	1	0	40	38	1
15972	ENSMUSG00000049866	Arl4c	29097	0	1	0	40	38	1
5376	ENSMUSG00000024454	Hdac3	19173	0	1	0	59	56	1
3552	ENSMUSG00000023169	Slc38a1	71496	0	1	0	39	37	1
5407	ENSMUSG00000025745	Hadha	36859	0	1	0	39	37	1
7771	ENSMUSG00000032329	Hmg20a	78328	0	1	0	174	165	1
6299	ENSMUSG00000027006	Dnajc10	38578	0	1	0	77	73	1
10883	ENSMUSG00000036278	Macrod1	141248	0	1	0	19	18	1
15744	ENSMUSG00000056216	Cebpg	10152	0	1	0	38	36	1
22759	ENSMUSG00000078153	Psme2b	837	0	1	0	93	88	1
1502	ENSMUSG00000009418	Nav1	172716	0	1	0	37	35	1
5575	ENSMUSG00000027533	Fabp5	4060	0	1	0	440	416	1
19231	ENSMUSG00000062070	Pgk1	16600	0	1	0	366	346	1
1097	ENSMUSG00000005198	Polr2a	24641	0	1	0	18	17	1
13814	ENSMUSG00000048706	Lurap1l	44983	0	1	0	18	17	1
15773	ENSMUSG00000053754	Chd8	59630	0	1	0	18	17	1
9400	ENSMUSG00000034818	Celf5	23483	0	1	0	18	17	1
7087	ENSMUSG00000028796	Phc2	98180	0	1	0	54	51	1
4713	ENSMUSG00000024960	Plcb3	24146	0	1	0	72	68	1
15591	ENSMUSG00000057134	Ado	4445	0	1	0	35	33	1
53469	ENSMUSG00000116486	Ado	4445	0	1	0	35	33	1
9157	ENSMUSG00000034329	Brip1	143056	0	1	0	139	131	1
9552	ENSMUSG00000033845	Mrpl15	12534	0	1	0	69	65	1
7643	ENSMUSG00000030077	Chl1	239626	0	1	0	102	96	1
872	ENSMUSG00000005447	Pafah1b3	2938	0	1	0	170	160	1
13001	ENSMUSG00000042834	Nrep	27011	0	1	0	219	206	1
1956	ENSMUSG00000018340	Anxa6	54338	0	1	0	387	364	1
17456	ENSMUSG00000063594	Gng8	3651	0	1	0	84	79	1
12366	ENSMUSG00000041346	Wrap53	18498	0	1	0	83	78	1
8560	ENSMUSG00000032116	Stt3a	38336	0	1	0	33	31	1
6051	ENSMUSG00000027674	Pex5l	193840	0	1	0	33	31	1
12335	ENSMUSG00000040502	March9	5174	0	1	0	66	62	1
11803	ENSMUSG00000040722	Scamp5	26734	0	1	0	98	92	1
8969	ENSMUSG00000034621	Gpatch8	80478	0	1	0	81	76	1
13763	ENSMUSG00000048827	Pkd1l3	59870	0	1	0	16	15	1
51047	ENSMUSG00000114763	Gm49354	23311	0	1	0	16	15	1
12249	ENSMUSG00000039193	Nlrc4	33705	0	1	0	386	362	1
19	ENSMUSG00000000120	Ngfr	18918	0	1	0	509	477	1
14036	ENSMUSG00000046201	Scaf8	83888	0	1	0	63	59	1
10338	ENSMUSG00000037321	Tap1	9673	0	1	0	31	29	1
17562	ENSMUSG00000064115	Cadm2	965488	0	1	0	77	72	1
13126	ENSMUSG00000049734	Trex1	1802	0	1	0	15	14	1
14752	ENSMUSG00000055296	Tmem245	80515	0	1	0	15	14	1
7175	ENSMUSG00000028468	Rgp1	8773	0	1	0	15	14	1
4251	ENSMUSG00000023909	Paqr4	4682	0	1	0	15	14	1
18589	ENSMUSG00000063334	Krr1	15769	0	1	0	15	14	1
45	ENSMUSG00000000276	Dgke	31672	0	1	0	15	14	1
10387	ENSMUSG00000036550	Cnot1	88014	0	1	0	30	28	1
12442	ENSMUSG00000049076	Acap2	108834	0	1	0	30	28	1
2165	ENSMUSG00000008333	Snrpb2	9815	0	1	0	60	56	1
13245	ENSMUSG00000045287	Rtn4rl1	73987	0	1	0	105	98	1
10745	ENSMUSG00000037916	Ndufv1	5423	0	1	0	193	180	1
17243	ENSMUSG00000060475	Wtap	27374	0	1	0	74	69	1
7625	ENSMUSG00000029674	Limk1	32560	0	1	0	73	68	1
3109	ENSMUSG00000021198	Unc79	235207	0	1	0	131	122	1
4678	ENSMUSG00000025369	Smarcc2	31235	0	1	0	29	27	1
10109	ENSMUSG00000038604	Ripor1	16965	0	1	0	29	27	1
12727	ENSMUSG00000042197	Zfp451	53051	0	1	0	43	40	1
983	ENSMUSG00000004451	Ralb	34490	0	1	0	43	40	1
4009	ENSMUSG00000022905	Kpna1	58382	0	1	0	86	80	1
116	ENSMUSG00000000563	Atp5f1	17402	0	1	0	410	381	1
1521	ENSMUSG00000008682	Rpl10	2324	0	1	0	127	118	1
1669	ENSMUSG00000015755	Tab2	50578	0	1	0	14	13	1
5382	ENSMUSG00000024622	Hmgxb3	45774	0	1	0	14	13	1
1752	ENSMUSG00000019979	Apaf1	93460	0	1	0	14	13	1
2287	ENSMUSG00000013419	Zfp651	12413	0	1	0	42	39	1
37581	ENSMUSG00000090553	Snrpe	6421	0	1	0	83	77	1
14303	ENSMUSG00000046785	Epm2aip1	7165	0	1	0	55	51	1
6671	ENSMUSG00000029203	Ube2k	61756	0	1	0	92	85	1
3608	ENSMUSG00000024201	Kdm4b	76809	0	1	0	26	24	1
5762	ENSMUSG00000028330	Ncbp1	33791	0	1	0	39	36	1
12477	ENSMUSG00000045216	Hs6st1	38047	0	1	0	52	48	1
1138	ENSMUSG00000019132	BC005537	14541	0	1	0	167	154	1
8749	ENSMUSG00000030814	Bcl7c	47478	0	1	0	38	35	1
10148	ENSMUSG00000035953	Pip4p1	4789	0	1	0	76	70	1
2792	ENSMUSG00000020949	Fkbp3	11584	0	1	0	138	127	1
28463	ENSMUSG00000102428	Pcdhga12	76294	0	1	0	25	23	1
1860	ENSMUSG00000010721	Lmbr1	148589	0	1	0	25	23	1
11639	ENSMUSG00000040270	Bach2	347305	0	1	0	50	46	1
7730	ENSMUSG00000028433	Ubap2	80832	0	1	0	62	57	1
9106	ENSMUSG00000034168	Irf2bpl	4098	0	1	0	37	34	1
27713	ENSMUSG00000073411	H2-D1	4770	0	1	0	147	135	1
15388	ENSMUSG00000052584	Serp2	24076	0	1	0	85	78	1
20525	ENSMUSG00000078812	Eif5a	5245	0	1	0	738	677	1
[truncated: 13,042 more rows]
