# Supplementary material for: Promoting axon regeneration by enhancing the non-coding function of the injury-responsive coding gene Gpr151
Source: Research Square preprint supplement (doi:10.21203/rs.3.rs-269886/v1), 2021-03-10
Supplement: Supplementary file 5 [file a35920d33c2aac0f41108890.xlsx]

## Sheet: signalingAA
Filter: 1358			Fold change	Normalized data (log2)
Probe Set ID	Gene symbol	Antibody Name	5'UTRm/control	Control	5'UTRm
1	ACTA1	Actin-alpha-1	0.907334	13.3086	13.1683
2	ACTG2	Actin-gamma2	0.550032	8.10134	7.23892
3	ACTB	Actin-pan	0.794624	11.473	11.1414
4	IAPP	Amylin	0.677334	7.82445	7.26238
5	ANXA6	Annexin A6	0.671489	7.70037	7.12581
6	TFAP2A	AP-2	1.05451	6.84042	6.917
7	APAF1	APAF-1-ALT	1.16043	6.46508	6.67975
8	APC	APC	1.1325	7.16869	7.3482
9	NOL3	ARC	0.918903	12.0002	11.8782
10	BAK1	Bak	1.00066	6.65773	6.65868
11	BAX	Bax	0.557498	10.3211	9.47811
12	BCL2L11	BIM	1.3336	6.59884	7.01416
13	CASP10	Caspase 10	1.16606	6.84676	7.06841
14	CARD6	CARD6	1.31294	6.66492	7.05772
15	CTNNA1	Catenin-alpha1	1.07726	11.0572	11.1646
16	JUP	Catenin-gamma	0.871042	8.59696	8.39777
17	NME2	NM23	1.17264	8.67387	8.90363
18	NFE2L2	Nrf2	1.01624	6.81477	6.83801
19	ENO2	NSE	0.777959	7.30849	6.94626
20	POU2F1	Octamer-binding protein 1	0.826753	7.41048	7.13601
21	POU2F2	Octamer-binding protein 2	0.535113	7.68276	6.78067
22	POU5F1	Octamer-binding protein 3	0.581358	7.4692	6.6867
23	SPP1	Osteopontin	0.705983	7.75534	7.25305
24	CDKN2A	p16 INK	1.31095	6.83405	7.22466
25	CDKN2A	p14 ARF	1.09005	6.64323	6.76762
26	CDKN2B	p15 INK	1.12664	7.15853	7.33055
27	CDKN2C	p18 INK	1.25573	6.46508	6.79361
28	EP300	p300	1.05998	6.45682	6.54085
29	KAT2B	p300/CBP	1.01116	6.84676	6.86278
30	DCTN2	p50 Dynamitin	1.0215	6.61379	6.64447
31	TP63	p63	0.576628	7.99972	7.20543
32	PTH	Parathyroid Hormone	1.18383	6.49769	6.74115
33	PRKN	Parkin	1.3284	6.72123	7.13092
34	CCNL1	Cyclin L1	0.842803	6.79523	6.5485
35	PTCH1	Patched	1.08914	11.8576	11.9808
36	H1F0	Histone 1F0	1.13389	7.4774	7.65868
37	FES	FES	1.20506	7.00256	7.27166
38	ADRA2A	Adrenergic Receptor alpha-2A	0.812371	7.16869	6.8689
39	HMGB1	HMGB1	0.778371	7.39758	7.03611
40	FGR	FGR	0.584769	7.85308	7.07902
41	POLA1	DNA Polymerase alpha	0.714624	7.30389	6.81915
42	PRKAR1A	KAP0	0.608848	7.84676	7.13092
43	TOP2A	TOP2A	1.23573	6.71431	7.01968
44	UNG	UNG	1.1093	7.15853	7.30819
45	H2AFX	Histone H2AX	1.16752	6.93274	7.15618
46	EPCAM	TACD1	1.22366	7.13799	7.4292
47	ATF7	ATF7	1.09057	6.70037	6.82546
48	ADRA2B	Adrenergic Receptor alpha-2B	0.992318	7.04178	7.03065
49	ADRA2C	Adrenergic Receptor alpha-2C	1.14131	6.67208	6.86278
50	ATF1	ATF1	1.20556	6.66492	6.93463
51	ATF3	ATF3	1.14782	6.65773	6.85662
52	ELK1	Elk1	1.28204	6.4733	6.83175
53	TBP	TBP	0.805396	6.85308	6.54085
54	TNFRSF1B	TNF Receptor II	0.902107	10.0418	9.89315
55	SLK	SLK	1.01468	6.46508	6.4861
56	MUC13	MUC13	1.12217	7.16869	7.33499
57	CDCP1	CDCP1	0.965746	7.82445	7.77416
58	CSNK1G1	CKI-gamma1	0.737038	7.6212	7.18102
59	BRMS1	BRMS1	0.577509	7.67921	6.88713
60	AKIP1	BCA3	0.729293	7.57612	7.12069
61	TSHZ2	TSH2	0.531553	8.05279	7.14108
62	SERINC1	SERC1	1.20836	6.95639	7.22943
63	CREBZF	CREBZF	1.00934	6.71431	6.72773
64	ETNK2	EKI2	1.11588	6.73497	6.89315
65	FASTKD2	FAKD2	1.15775	6.34479	6.55611
66	MARK1	MARK	1.05519	6.44014	6.51764
67	HMG20B	HMG20B	1.05516	6.82765	6.90512
68	HSFX1	LW-1	1.16292	6.48961	6.70736
69	MRC2	MRC2	1.2062	6.52957	6.80004
70	POLL	DNA Polymerase lambda	1.18638	6.76207	7.00863
71	KLHL3	KLHL3	1.58685	6.77542	7.44159
72	MLX	Mlx	0.87353	7.52563	7.33055
73	IP6K2	IP6K2	0.759086	6.80178	6.40411
74	PARK7	PARK7	0.94852	6.51372	6.43747
75	PARP3	PARP3	0.991705	6.53744	6.52542
76	PHLDA1	PHLA1	0.795939	7.32676	6.99749
77	PRPF19	PRPF19	0.661195	7.52563	6.92877
78	RAD51B	RAD51L1	0.605709	7.57993	6.85662
79	RAD50	RAD50	0.808394	7.92975	7.62288
80	XRCC3	XRCC3	0.861838	7.69862	7.48411
81	STAT5A	STAT5A/B	0.729492	7.75871	7.30367
82	ABHD11	ABHD11	1.19163	6.5913	6.84424
83	ABHD12	ABHD12	1.03772	6.82765	6.88108
84	ABHD12B	ABHD12B	1.21111	6.83405	7.11038
85	ABHD14A	ABHD14A	1.07701	6.53744	6.64447
86	ABHD14B	ABHD14B	1.06102	6.53744	6.62288
87	ABHD4	ABHD4	1.02223	7.0473	7.07902
88	ACTR3	ACTR3	1.21339	6.58373	6.86278
89	SLC25A6	SLC25A6	1.20869	6.51372	6.78716
90	SLC25A31	SLC25A31	0.860091	8.2037	7.98626
91	ADH7	ADH7	0.683652	7.17878	6.63012
92	ALDH3B1	ALDH3B1	0.872037	6.70736	6.50982
93	SAR1B	SAR1B	0.905576	7.23787	7.09478
94	GNL3L	GNL3L	1.00474	6.70736	6.71418
95	HLA-H	HLAH	0.701631	7.31765	6.80644
96	HLA-DOA	HLA-DOA	0.640841	7.55303	6.91107
97	HOXA11	HOXA11/D11	0.916886	7.53351	7.40832
98	HOXA6	HOXA6	0.572472	7.70387	6.89915
99	HOXB2	HOXB2	0.599917	7.71778	6.98061
100	NKX2-6	NKX26	0.548681	7.818	6.95204
101	SIX5	SIX5	0.931539	6.78206	6.67975
102	IGLL1	IGLL1	1.08615	6.40619	6.52542
103	USP53	USP53	1.01863	7.04178	7.06841
104	KCNJ2	KCNJ2	0.828865	9.88732	9.61653
105	DCT	DCT	1.16237	6.73497	6.95204
106	LILRA1	LILRA1	1.19002	6.41475	6.66574
107	LILRA2	LILRA2	1.36801	6.50573	6.9578
108	SLC27A4	SLC27A4	1.0807	7.80504	7.917
109	LDLRAD1	LDLRAD1	1.1282	6.65773	6.83175
110	LDLRAD2	LDLRAD2	0.89626	6.93869	6.78067
111	LDLRAD3	LDLRAD3	0.977381	7.07996	7.04695
112	SLC5A3	SLC5A3	0.906779	6.98542	6.84424
113	SLC28A2	SLC28A2	0.972584	6.87185	6.83175
114	SLC24A4	SLC24A4	0.721647	7.21844	6.74781
115	SLC8B1	SLC24A6	0.711321	7.54915	7.05772
116	SLC5A6	SLC5A6	0.82643	8.07187	7.79683
117	SLC17A2	SLC17A2	0.611489	7.54135	6.83175
118	SLC4A10	SLC4A8/10	0.555556	7.81153	6.96354
119	SLCO1A2	SLCO1A2	0.611264	7.6212	6.91107
120	SPTBN1	SPTBN1	1.05453	7.07457	7.15117
121	SPTBN5	SPTBN5	1.07077	6.37143	6.47007
122	STMN4	STMN4	1.14792	6.61379	6.81281
123	STK39	STK39	1.11758	6.61379	6.77416
124	SVOP	SVOP	1.22485	6.41475	6.70736
125	CCT6A	CCT6A	1.17826	6.61379	6.85044
126	TNXB	TNXB	1.46141	6.19378	6.74115
127	USP13	USP13	1.23066	6.41475	6.71418
128	USP19	USP19	1.02796	6.85936	6.89915
129	USP24	USP24	0.955993	6.89039	6.82546
130	USP30	USP30	1.06366	6.58373	6.67276
131		Nucleophosmin (NPM)	0.991332	7.17374	7.16118
132	BCL10	BCL-10	1.03382	7.31765	7.36564
133	CD8A	CD8	0.663371	7.31308	6.72097
134	IFNG	IFN-gamma	0.609924	7.2618	6.5485
135	IL10	IL-10	0.591739	7.79851	7.04154
136	CXCL8	IL-8	0.601533	7.58373	6.85044
137	CD14	CD14	0.604106	8.20123	7.4741
138	IL6	IL-6	0.578704	7.48961	6.7005
139	MME	CD10	1.13006	6.31765	6.49405
140	CD3D	CD3	1.00792	6.78866	6.80004
141	MCL1	MCL-1	0.948556	6.25228	6.17608
142	CD19	CD19	1.16111	6.31765	6.53315
143	CHEK1	CHK1	1.2855	6.19378	6.55611
144	FOXP3	Foxp3	1.15534	6.63593	6.84424
145	esr1	Rab25	1.37209	6.17374	6.63012
146	TNNI3	cTnI (TNNI3)	1.20294	6.40619	6.67276
147	S100A6	Calcyclin (S100A6)	0.967224	6.74858	6.7005
148	HPRT1	HPRT	0.907692	6.75534	6.61562
149	DNM1	Dynamin-1	1.03423	6.38891	6.43747
150	TP53	p53 (Acetyl-Lys386)	1.39577	7.43594	7.917
151	RELA	NF-kB p65 (Acetyl-Lys310)	1.21488	7.52563	7.80644
152	FFAR4	GPR120	0.860214	8.10134	7.8841
153	GPR150	GPR150	0.73048	8.0054	7.55231
154	GPR151	GPR151	0.84264	11.3392	11.0922
155	GPR152	GPR152	0.560314	7.97677	7.14108
156	GPR153	GPR153	0.556208	8.18129	7.33499
157	GPR160	GPR160	0.709877	7.81153	7.31718
158	GPR171	GPR171	0.853595	7.38456	7.15618
159	GPR173	GPR173	1.19126	6.90869	7.16118
160	GPR174	GPR174	1.11252	6.61379	6.76762
161	CREBBP	CBP (Acetyl-Lys1535)	1.08806	6.79523	6.917
162	ADGRE1	EMR1	1.45377	6.60633	7.14613
163	ADGRE2	EMR2	1.34675	6.41475	6.84424
164	ADGRE3	EMR3	0.989406	12.0774	12.0621
165	GPR132	GPR132	1.52061	6.65773	7.26238
166	TPRA1	GPR175	1.06982	6.80178	6.89915
167	GPR18	GPR18	0.961576	6.99115	6.93463
168	CASP6	Caspase 6 (Cleaved-Asp162)	1.14182	7.50573	7.69707
169	CAV1	Caveolin-1	1.29148	11.2409	11.6099
170	CLDN4	Claudin 4	0.635364	7.66851	7.01416
171	CLDN1	Claudin 1	1.03315	10.3039	10.3509
172	CLDN2	Claudin 2	1.03806	9.73326	9.78716
173	CLDN3	Claudin 3	1.2704	10.6716	11.0169
174	CLDN5	Claudin 5	0.98767	11.5809	11.563
175	CSE1L	CSE1L	0.616962	8.10927	7.41252
176	CDH1	E-cadherin	0.859496	7.41901	7.20058
177	CDH1	Cadherin-pan	0.923494	7.49769	7.38286
178	FOS	Fos	1.2429	7.06916	7.38286
179	ERBB3	HER3	0.935775	9.23304	9.13728
180	CLDN10	Claudin 10	1.35719	6.60633	7.04695
181	CLDN11	Claudin 11	0.905287	10.0397	9.89615
182	CLDN7	Claudin 7	1.19552	6.96224	7.21988
183	COL1A2	Collagen I	1.56175	6.81477	7.45793
184	COL2A1	Collagen II	1.20684	6.99115	7.26238
185	COL3A1	Collagen III	0.943563	7.81153	7.72773
186	COL4A1	Collagen IV	0.791026	10.8699	10.5317
187	GJA1	Connexin 43	1.13308	7.09602	7.27628
188	PAX5	Pax-5	1.19177	10.3016	10.5547
189	PCNA	PCNA	0.792704	7.46096	7.12581
190	PDGFB	PDGFB	0.746217	8.15342	7.73109
191	PDGFRA	PDGFR alpha	0.592955	8.216	7.46199
192	PRPH	Peripherin	1.16185	11.483	11.6994
193	UCHL1	PGP9.5	0.650639	7.60633	6.98626
194	PML	PML	0.740912	7.91474	7.48211
195	PMP22	PMP22	1.11939	7.29928	7.46199
196	KCNC2	Potassium Channel Kv3.2b	1.14008	9.06508	9.25422
197	PSEN1	Presenilin 1	0.989723	6.83405	6.81915
198	PAWR	Prostate Apoptosis Response protein-4	1.19243	6.51372	6.76762
199	PSCA	Prostate Stem Cell Antigen	1.278	6.54525	6.89915
200	KLK3	Prostate-specific Antigen	1.36008	6.4733	6.917
201	RAN	RAN	1.22951	6.85308	7.15117
202	HRAS	RASH/RASK	1.46248	6.76876	7.31718
203	RCBTB1	RCBTB1	1.2087	10.0432	10.3166
204	RARB	Retinoic Acid Receptor beta	1.02334	8.24989	8.28317
205	RXRG	Retinoid X Receptor gamma	0.89376	7.1483	6.98626
206	RIT1	RIT1	1.27126	10.2099	10.5561
207	EPHA1	EPHA1	1.07985	7.13281	7.24365
208	RPS6KB1	S6K	0.810004	7.2618	6.9578
209	JAK1	JAK1	0.591739	7.57612	6.81915
210	TNFSF4	TNFL4	0.576661	7.69335	6.89915
211	ITPKA	IP3KA	0.581282	7.92377	7.14108
212	NR2F2	COT2	0.615313	7.64687	6.94626
213	CDK2	CDK2	0.732861	7.40619	6.9578
214	HMGB2	HMGB2	0.984675	7.09069	7.06841
215	MAPK3	p44 MAPK	0.882176	7.61006	7.4292
216	MAPK1	p42 MAPK	1.02475	12.2704	12.3056
217	ERCC5	ERCC5	1.23163	6.53744	6.83801
218	EPHB2	EPHB2	1.22878	6.64323	6.94046
219	AKT1	AKT	0.7481	8.37362	7.95493
220	TNFSF8	CD153	1.33246	6.66492	7.07902
221	GRK5	GRK5	1.37959	6.3358	6.80004
222	RORA	RORA	1.10691	7.06372	7.21026
223	GRK3	GRK3	0.887773	7.16362	6.99188
224	ATP7B	ATP7B	0.938671	7.24749	7.15618
225	CSK	CSK	1.23344	6.70037	7.00307
226	SHPK	CARKL	0.911587	6.83405	6.7005
227	STAG3	STAG3	0.981041	7.16869	7.14108
228	RPS6KA6	S6K-alpha6	0.477943	7.88424	6.81915
229	EMCN	Mucin-14	0.354709	8.27597	6.78067
230	ZMYND8	PKCB1	0.672985	7.70736	7.13601
231	PYCARD	ASC	0.804716	8.04454	7.73109
232	MOK	MOK	0.587665	7.68983	6.9229
233	DLEC1	DLEC1	0.656432	7.6863	7.07902
234	CHKB	CHKB	1.05318	7.10134	7.17608
235	ATF5	ATF5	1.23631	6.62858	6.93463
236	ATG4B	ATG4B	1.20663	6.56077	6.83175
237	CDC42BPB	MRCKB	1.31809	6.3626	6.76105
238	IRAK3	IRAK3	1.28922	6.5913	6.9578
239	TAF6L	TAF6L	1.31524	6.52167	6.917
240	IKBKG	IKK-gamma	1.11717	6.72123	6.88108
241	ZHX2	ZHX2	0.936949	7.07457	6.98061
242	YWHAH	14-3-3 eta	0.871644	7.13281	6.93463
243	YWHAG	14-3-3 gamma	0.967902	6.82123	6.77416
244	YWHAZ	14-3-3 zeta	1.1689	6.56846	6.79361
245	ALDH1B1	ALDH1B1	0.992405	7.03068	7.01968
246	AKR1C8P	AKR1CL1	0.635604	7.48555	6.83175
247	AKR1E2	AKR1CL2	0.451744	7.99687	6.85044
248	AKR1B1	AKR1B1	0.431517	8.13541	6.9229
249	AMPD1	AMPD1	0.393763	8.20123	6.85662
250	APLP2	APLP2	0.895247	8.05279	7.89315
251	AIG1	AIG1	0.594411	7.55691	6.80644
252	APOF	APOF	0.879554	7.67921	7.49405
253	APOL1	APOL1	0.940334	6.92676	6.83801
254	APOL2	APOL2	1.1599	6.51372	6.72773
255	ARFIP1	ARFIP1	2.58896	10.9836	12.356
256	ARSA	ARSA	1.25909	6.56077	6.89315
257	ARSD	ARSD	1.34216	6.3626	6.78716
258	ARSI	ARSI	1.66866	12.1297	12.8684
259	ARSK	ARSK	1.21912	6.91474	7.20058
260	ATP5H	ATP5H	1.12511	8.49567	8.66574
261	ATP5F1D	ATP5D	0.876037	7.36702	7.17608
262	ATP5F1C	ATPG	0.938722	7.00823	6.917
263	ATP5MC2	ATP5G2	1.08081	6.89652	7.00863
264	LRP10	LRP10	0.928818	7.05279	6.94626
265	LRP11	LRP11	0.670931	7.98829	7.41252
266	LRP3	LRP3	0.616191	7.5177	6.81915
267	LAMP3	LAMP3	0.621862	7.52957	6.84424
268	ABCC12	MRP9	0.530012	7.89652	6.98061
269	MDFI	MDFI	0.638391	7.92377	7.27628
270	MYOM1	MYOM1	0.732554	7.2618	6.81281
271	MYOM2	MYOM2	0.763373	7.3358	6.94626
272	MPRIP	MPRIP	1.15701	6.81477	7.02518
273	MYH14	MYH14	1.28136	6.21355	6.57122
274	MYH4	MYH4	1.22478	6.34479	6.63731
275	MYBPC3	MYBPC3	1.26041	6.25228	6.58617
276	MYO1D	MYO1D	1.17909	6.74858	6.98626
277	CYB5R1	CYB5R1	1.47654	7.63593	8.19815
278	CYB5R3	CYB5R3	1.18317	6.6505	6.89315
279	ME1	ME1	0.882176	7.0251	6.84424
280	ME3	ME3	0.854323	6.92076	6.69362
281	NOX3	NOX3	0.863316	6.97966	6.76762
282	NOX5	NOX5	0.993304	6.92076	6.91107
283	USP32	USP32	0.852571	6.99115	6.76105
284	USP36	USP36	0.506423	7.66133	6.67975
285	USP42	USP42	0.729031	7.36702	6.91107
286	UBTD1	UBTD1	0.759383	7.91474	7.51764
287	UBFD1	UBFD1	0.592008	7.19378	6.43747
288	UBA5	UBA5	0.721354	7.6863	7.21508
289	UBAC1	UBAC1	0.720165	7.07457	6.60097
290	UBAP2L	UBAP2L	1.11908	6.6505	6.81281
291	UBE3B	UBE3B	1.18931	6.49769	6.74781
292	USP6NL	USP6NL	1.19755	6.19378	6.45386
293	ATP6V1B1	ATP6V1B1	1.12119	6.57612	6.74115
294	ATP6V1H	ATP6V1H	1.12934	6.44014	6.61562
295	VANGL1	VANGL1	1.21564	6.53744	6.81915
296	WDHD1	WDHD1	1.15261	6.81477	7.01968
297	WASF3	WASF3	1.16027	7.29928	7.51374
298		WASF4	1.08034	6.96224	7.07372
299	SLC30A1	SLC30A1	0.998103	6.85936	6.85662
300	SLC30A4	SLC30A4	1.02685	7.0195	7.05772
301	SLC30A8	SLC30A8	0.981041	7.19875	7.17113
302	SRA1	SRA	0.833885	6.79523	6.53315
303	SNCA	SNCA (alpha-synuclein)	0.466657	7.54525	6.44569
304	AKT3	AKT3	0.613963	7.25228	6.5485
305	FBLN5	Fibulin 5	0.868783	6.66492	6.46199
306	LCK	Lck	0.752726	7.11716	6.70736
307	ATP2C1	ATP2C1	0.666269	7.56077	6.97494
308	BLK	BLK	0.865624	7.1888	6.98061
309	TYK2	Tyrsoine Kinase 2 (Tyk2)	0.760929	9.83883	9.44467
310	MAPK1	ERK2	1.16819	7.97388	8.19815
311	MB	Myoglobin	1.2263	6.29928	6.59359
312	GADD45B	GADD45 beta	1.28729	6.57612	6.94046
313	MAP2K4	MAP2K4	1.15575	6.2037	6.41252
314	EGFR	EGFR	1.21268	6.1838	6.46199
315	EIF4EBP1	4E-BP1	1.40036	5.96807	6.45386
316	INHA	INHA (Inhibin alpha)	1.08218	8.19875	8.31269
317	DNM2	Dynamin-2	1.07286	6.67921	6.78067
318	IKBKB	IKBKB (IKK beta)	0.889781	6.76207	6.59359
319	AURKB	AURKB	0.96383	6.43173	6.37858
320	S100A10	S100A10/ P11	1.03423	6.38891	6.43747
321	Casp9	Caspase 9 (Cleaved-Asp353)	0.933917	6.85308	6.75444
322	CASP9	Caspase 9 (Cleaved-Asp330)	0.660912	8.16869	7.57122
323	LMNA	Lamin A (Cleaved-Asp230)	0.778385	8.33355	7.9721
324	PTGER3	PE2R3	1.10915	7.19875	7.3482
325	PTGER4	PE2R4	0.879554	6.87185	6.6867
326	CASP7	Caspase 7 (Cleaved-Asp198)	0.489625	11.6964	10.6662
327	CASP9	Caspase 9 (Cleaved-Asp315)	0.921538	8.34255	8.22466
328	CASP1	CASP1 (p20,Cleaved-Asn120)	0.791081	9.94091	9.60281
329	CASP2	CASP2 (p18,Cleaved-Gly170)	1.29111	6.60633	6.97494
330	CASP2	CASP2 (p18,Cleaved-Thr325)	0.911365	7.4733	7.33941
331	CASP4	CASP4 (p20,Cleaved-Gln81)	1.32818	6.6212	7.03065
332	CASP5	CASP5 (p20,Cleaved-Asp121)	1.24416	7.04178	7.35695
333	CASP5	CASP5 (p10,Cleaved-Ser331)	1.37265	6.93869	7.39565
334	CASP8	CASP8 (Cleaved-Asp384)	1.25424	6.90262	7.22943
335	EFNA2	EFNA2 (Cleaved-Asn188)	1.45588	6.78866	7.33055
336	MMP1	MMP1 (Cleaved-Phe100)	0.942511	7.38456	7.29914
337	MMP12	MMP12 (Cleaved-Glu106)	1.11465	7.0195	7.17608
338	MMP14	MMP14 (Cleaved-Tyr112)	1.1921	6.98542	7.23892
339	MMP15	MMP15 (Cleaved-Tyr132)	1.06161	6.70736	6.79361
340	PTGS1	COX1	1.2656	10.2025	10.5423
341	PTGS2	COX2	0.480121	8.15853	7.1
342	CREBBP	CREB-BP	1.03781	8.95785	9.0114
343	CUL1	Cullin 1	1.01176	10.9883	11.0052
344	CUL2	Cullin 2	0.906421	8.818	8.67626
345	CUL3	Cullin 3	0.642928	7.59507	6.9578
346	CCNA1	Cyclin A	1.28732	6.69335	7.05772
347	CCNA1	Cyclin A1	1.207	7.43594	7.70736
348	CCNE1	Cyclin E1	1.16298	7.11716	7.33499
349	CCNF	Cyclin F	0.790819	9.54037	9.20179
350	CCNG1	Cyclin G	0.823988	8.84676	8.56746
351	CYCS	Cytochrome c	1.22413	6.83405	7.12581
352	DES	Desmin	1.01321	13.0634	13.0823
353	PARK7	DJ-1	1.07301	7.71431	7.81598
354	POLB	DNA Polymerase beta	1.46543	6.3358	6.88713
355	PRKDC	DNA-PK	0.934874	7.74519	7.64804
356	TFDP1	DP-1	0.945905	11.0651	10.9848
357	DYSF	Dysferlin	1.21413	7.15342	7.43334
358	E2F4	E2F4	0.971999	6.77542	6.73445
359	S100A1	S100 A1	1.00937	7.12762	7.14108
360	INPP5D	SHIP1	0.746538	7.84676	7.42505
361	PTPN11	SH-PTP2	0.843351	7.43173	7.18593
362	SIRPA	Sirp alpha1	0.909154	6.87185	6.73445
363	SKP1	SKP1A/p19	0.643099	7.6175	6.98061
364	SKP2	SKP2/p45	0.745591	7.24269	6.81915
365	SNAP25	SNAP25	1.58291	6.3626	7.02518
366	SCN1A	Sodium Channel-pan	1.45974	6.38891	6.93463
367	SST	Somatostatin	1.44304	6.44014	6.96925
368	CSTA	Stefin A	1.39462	6.6863	7.16617
369	CSTB	Stefin B	1.34745	6.38891	6.81915
370	SYK	SYK	1.23596	7.00256	7.30819
371	SYP	Synaptophysin	1.4482	6.57612	7.11038
372	SNCG	Synuclein gamma	1.4762	7.32221	7.8841
373	SNCB	Synuclein beta	1.42605	6.61379	7.12581
374	SNCA	Synuclein-pan	1.21424	6.94461	7.22466
375	TGFBR2	TGF beta Receptor II	1.03285	7.25705	7.30367
376	TGFBR3	TGF beta Receptor III	1.05078	8.31994	8.3914
377	TGFB1	TGF beta1	0.959361	6.51372	6.45386
378	STAT1	STAT1	1.15351	7.78866	7.99469
379	STAT5A	STAT5A	0.894761	7.27597	7.11554
380	FRK	FRK	0.981041	6.99687	6.96925
381	MAP2K4	JNKK	0.977069	6.96224	6.92877
382	PHKA1	KPB1/2	0.527412	7.50171	6.57872
383	ATRX	ATRX	0.830381	7.14316	6.875
384	YAP1	YAP	1.42744	6.57612	7.08955
385	CSNK1A1	CKI-alpha	1.55747	6.48148	7.12069
386	CDK8	CDK8	1.64356	6.28066	6.99749
387	FLT3LG	Flt3 ligand	1.36733	6.3358	6.78716
388	ERF	ERF	1.2855	6.45682	6.81915
389	TNFSF10	CD253	1.42796	6.50573	7.01968
390	BRCA2	BRCA2	1.34653	6.6863	7.11554
391	MNAT1	MAT1	1.11013	6.84676	6.99749
392	MAP2K6	MAP2K6	1.39185	6.3358	6.81281
393	RBM5	RBM5	0.888552	7.22819	7.05772
394	HK3	Hexokinase-3	1.11873	6.84676	7.00863
395	EFNA3	EFNA3	1.2621	6.54525	6.88108
396	LIMK1	LIMK1	1.15166	6.53744	6.74115
397	HTR1A	5-HT-1A	1.19949	6.96224	7.22466
398	HTR1F	5-HT-1F	0.964892	6.93869	6.88713
399	HTR2C	5-HT-2C	0.838208	7.04178	6.78716
400	HTR3A	5-HT-3A	0.871195	7.03068	6.83175
401	HTR4	5-HT-4	0.665276	7.68276	7.09478
402	HTR5A	5-HT-5A	0.714091	7.79851	7.31269
403	ACTN1	ACTN 1/2/3/4	1.54081	6.42326	7.04695
404	ADCY4	ADCY4	1.43984	6.66492	7.19083
405	ADCY6	ADCY5/6	1.52907	6.19378	6.80644
406	ADCY7	ADCY7	1.46082	6.11191	6.65868
407	ADCY8	ADCY8	1.36157	6.3802	6.82546
408	ADD2	ADD2	1.5624	6.35372	6.99749
409	ADD3	ADD3	1.1282	6.65773	6.83175
410	AIFM2	AIFM2	1.34745	6.38891	6.81915
411	AVEN	AVEN	1.13235	6.66492	6.84424
412	BUB3	BUB3	0.746144	7.16362	6.74115
413	CYB561D2	C56D2	1.17024	7.14316	7.36996
414	CABLES2	Ik3-2	1.26701	6.96224	7.30367
415	CDH10	CDH10	1.22012	6.90869	7.19571
416	ATP5MC3	ATP5G3	1.16843	7.07457	7.29914
417	ATP5F1A	ATP5A1	0.881565	7.17374	6.99188
418	ATP5S	ATP5S	0.592178	7.97098	7.21508
419	BAGE2	BAGE2	1.08064	8.22089	8.33277
420	BAGE3	BAGE3	0.673551	7.40189	6.83175
421	BAGE4	BAGE4	0.534267	8.05553	7.15117
422	CARD19	C9orf89	1.63697	6.44014	7.15117
423	GCNT7	GCNT7	1.62573	6.46508	7.16617
424	GLB1L3	GLB1L3	1.47433	6.48148	7.04154
425	SLC27A5	SLC27A5	1.35404	6.59884	7.03611
426	BST2	BST2	1.46169	6.23304	6.78067
427	BMP8A	BMP8A	1.65513	6.3626	7.08955
428	ARFGEF2	ARFGEF2	1.48266	6.80178	7.36996
429	CHP2	CHP2	1.49188	6.41475	6.99188
430	KCNMB2	KCNMB2	1.26856	11.7307	12.0739
431	SLC25A12	CMC1	1.5066	9.75197	10.3433
432	CNN2	CNN2	1.11543	6.78866	6.94626
433	ARPP21	ARPP21	1.23211	6.73497	7.03611
434	CAGE1	CAGE1	1.07421	6.49769	6.60097
435	NCR1	NCR1	1.24966	6.99115	7.31269
436	NCR3	NCR3	0.86239	7.41901	7.20543
437	NEGR1	NEGR1	0.629347	7.91172	7.24365
438	NREP	C5orf13	0.952922	7.30849	7.23892
439	SEPT3	Septin-3	0.747764	7.27597	6.85662
440	NSG1	NSG1	0.611313	7.88115	7.17113
441	NSG2	NSG2	1.5875	6.3802	7.04695
442	NPTN	NPTN	1.15987	8.21109	8.42505
443	NTM	NT	1.62485	6.3358	7.03611
444	NLE1	NLE1	1.56967	6.29	6.94046
445	NFRKB	NFRKB	1.4254	6.42326	6.93463
446	PPP1R8	PPP1R8	1.68788	6.34479	7.1
447	NCOA7	NCOA7	1.45245	6.28066	6.81915
448	NRBF2	NRBF2	1.44969	6.30849	6.84424
449	NFYC	NFYC	1.30021	7.56462	7.94336
450	URB1	URB1	1.00209	6.87806	6.88108
451	PDRG1	PDRG1	1.08166	6.88424	6.99749
452	PPRC1	PPRC1	1.15941	6.72123	6.93463
453	PIGH	PIGH	1.09771	6.54525	6.67975
454	SLC39A7	SLC39A7	1.15226	6.74179	6.94626
455	SLC39A1	SLC39A1	0.862127	7.5177	7.30367
456	PTGR2	ZADH1	0.653146	7.54915	6.93463
457	ZADH2	ZADH2	1.04722	6.99115	7.05772
458	ZP1	ZP1	0.909624	7.04178	6.90512
459	ZNHIT6	CA181	0.910208	7.12762	6.99188
460	FOXE1	TTF2	1.68957	6.1838	6.94046
461	LAMA1	LAMA1	1.56853	6.44014	7.08955
462	NS1	14-3-3 theta	1.69244	6.43173	7.19083
463	INSL4	INSL4	1.3797	7.15853	7.62288
464	EFEMP1	EFEMP1	1.51726	6.34479	6.94626
465	EEF1G	EEF1G	1.7022	6.25228	7.01968
466	TUFM	TUFM	1.54967	6.30849	6.94046
467	ELOVL1	ELOVL1	1.34336	6.4733	6.89915
468	ZP4	ZP4	1.34616	8.72984	9.15869
469	EPN2	EPN2	1.01402	6.90869	6.92877
470	MYC	MYC	1.26929	6.61379	6.9578
471	MET	MET	1.13801	6.82765	7.01416
472	EFNA1	EFNA1	1.13197	6.80178	6.98061
473	PTK6	PTK6 (breast tumor kinase)	1.25726	6.70037	7.03065
474	LYN	LYN	0.805855	6.99115	6.67975
475	CD34	CD34	0.70492	7.25228	6.74781
476	TXN	Thioredoxin (TRX)	1.11744	6.56077	6.72097
477	PECAM1	CD31	1.02484	6.82123	6.85662
478	TYRO3	TYRO3	0.894159	7.09602	6.93463
479	RPS6KA1	RSK1 (p90 RSK)	1.6112	6.11191	6.80004
480	KAT8	MYST1	1.62504	6.3626	7.06307
481	CIB1	CIB1	1.47156	6.44014	6.99749
482	SORL1	SORL1	0.973039	8.27362	8.23419
483	DDR2	DDR2	1.49524	6.19378	6.77416
484	MERTK	c-Mer Proto-oncogene Tyrosine Kinase (MER)	1.48157	6.21355	6.78067
485	S100B	S100B	1.53745	6.07996	6.7005
486	AMACR	AMACR	1.60837	6.21355	6.89915
487	MAPK11	MAPK 11	1.11387	13.5447	13.7003
488	HCK	HCK	0.990267	7.33129	7.31718
489	STYK1	STYK1	1.22742	6.78866	7.08429
490	RET	RET	1.24382	6.40619	6.72097
491	NP	Influenza B virus Nucleoprotein	1.16791	6.40619	6.63012
492	MMP23A	MMP23 (Cleaved-Tyr79)	1.64562	7.4275	8.14613
493	MMP27	MMP27 (Cleaved-Tyr99)	0.900735	7.83405	7.68323
494	MMP3	MMP3 (Cleaved-Phe100)	0.748689	7.58373	7.16617
495	PARP1	PARP (Cleaved-Asp214)	0.982785	9.14958	9.12453
496	SUMO2	SUMO2/3 (Cleaved-Gly93)	1.24132	7.21355	7.52542
497	ITGA5	Integrin alpha-5 (ITGA5) (heavy chain,Cleaved-Phe42)	0.952781	6.93869	6.8689
498	ITGA5	Integrin alpha-5 (ITGA5) (light chain,Cleaved-Glu874)	1.79858	6.6863	7.53315
499	ITGA6	ITGA6 (light chain,Cleaved-Glu942)	1.59522	6.90869	7.58245
500	ITGA7	ITGA7 (light chain,Cleaved-Glu959)	1.97741	6.59884	7.58245
501	ITIH1	ITIH1 (Cleaved-Asp672)	1.94531	5.88424	6.84424
502	TP53	p53	1.47978	6.49769	7.06307
503	BRAF	B-RAF	1.33493	6.78866	7.20543
504	FER	FER	1.55687	6.53744	7.17608
505	MARK3	MARK3	1.628	6.54525	7.24835
506	CTNNB1	Catenin-beta 1	1.29942	7.06372	7.44159
507	ACTN2	ACTN alpha-2/3	1.19992	6.98542	7.24835
508	STAT3	STAT3	1.34662	6.74179	7.17113
509	HNF4A	HNF4alpha/gamma	1.18925	8.04454	8.2946
510	CAMK2B	CaMK2beta/gamma	1.08197	6.93869	7.05235
511	E2F6	E2F6	1.32028	6.75534	7.15618
512	COL18A1	Collagen alpha1 XVIII	1.12361	9.32789	9.49603
513	EFNA4	EFNA4	0.751622	7.82445	7.41252
514	EFNB3	EFNB3	0.890328	7.2037	7.03611
515	HSD17B10	ERAB	0.844943	8.03346	7.79039
516	ERCC1	ERCC1	0.82348	8.3802	8.1
517	MAPK3	p44/42 MAPK	1.39943	7.10134	7.58617
518	EZR	Ezrin	1.4051	6.29	6.78067
519	FASLG	FAS ligand	1.50616	6.92676	7.51764
520	FGFR1OP	FGFR1 Oncogene Partner	1.32124	7.55303	7.95493
521	FGFR2	FGFR2	1.59915	6.4485	7.12581
522	FGFR3	FGFR3	1.53577	6.5913	7.21026
523	FHIT	FHIT	1.70981	6.46508	7.23892
524	FBN1	Fibrillin-1	1.82116	6.51372	7.37858
525	NFKBIA	IKB alpha	1.70754	6.54525	7.31718
526	FLI1	FLI1	1.16445	6.85936	7.07902
527	FOSL2	Fra-2	1.37	6.84042	7.2946
528	GABBR1	GABA-B Receptor	1.17622	6.5913	6.82546
529	GAD1	GAD1	1.1071	10.8164	10.9632
530	TGFB2	TGF beta2	1.02517	8.1888	8.22466
531	TGFB3	TGF beta3	0.800416	7.12762	6.80644
532	TGFA	TGF alpha	0.955435	8.27362	8.20785
533	F2R	Thrombin Receptor	0.58952	8.79031	8.02792
534	THRA	Thyroid Hormone Receptor alpha	1.07035	8.51571	8.61379
535	THRB	Thyroid Hormone Receptor beta	0.770025	7.06372	6.6867
536	TIMP1	TIMP1	1.07612	8.42538	8.53122
537	TIMP2	TIMP2	1.09165	6.6863	6.81281
538	TIMP3	TIMP3	0.912175	11.0011	10.8685
539	TGM2	Transglutaminase 2	1.32849	6.59884	7.00863
540	SAE1	AOS1	1.55812	6.56077	7.20058
541	CD40	CD40	1.16036	8.38456	8.59913
542	CDK7	CDK7	1.40913	6.3802	6.875
543	UBR5	EDD	1.59939	6.3802	7.05772
544	FAS	FAS	1.06118	7.48555	7.57122
545	HAT1	HAT	1.119	7.01387	7.17608
546	NCOR1	NCoR1	1.21902	6.67208	6.9578
547	NEDD8	NEDD8	1.12793	6.56077	6.73445
548	NUB1	NYREN18	1.12048	6.63593	6.80004
549	LIMK2	LIMK2	0.930988	9.53547	9.43231
550	MAPK10	MAPK10	0.940406	7.99972	7.91107
551	TPD52	TPD52	0.778765	8.19875	7.83801
552	PKIA	IPKA	0.498765	7.90869	6.90512
553	BLCAP	BLCAP	0.895032	7.52563	7.36564
554	CSNK1G2	CKI-gamma2	0.697056	7.2618	6.74115
555	ST5	ST5	1.19737	6.6212	6.88108
556	CDKL1	CDKL1	1.25035	6.27126	6.59359
557	MEF2B	MEF2B	1.11102	7.32221	7.4741
558	SP3	SP3/4	0.968816	9.3403	9.2946
559	NHLH1	HEN1/2	1.45559	6.76207	7.30367
560	POU3F1	Octamer-binding protein 6	1.62516	6.64323	7.34381
561	CREM	CREM	1.41115	6.67921	7.17608
562	MVK	Mevalonate Kinase	1.23259	7.10663	7.40832
563	ERCC6	ERCC6	1.15399	8.33805	8.54468
564	HSF2	HSF2	1.11548	7.09069	7.24835
565	TLE2	TLE2	1.15981	6.82765	7.04154
566	TLE4	TLE4	1.13532	6.96807	7.15117
567	SRY	SRY	1.27068	6.72812	7.07372
568	CDH11	CDH11	1.11654	6.51372	6.67276
569	CDH18	CDH18	1.07312	7.12762	7.22943
570	CDH20	CDH20	0.606758	7.73497	7.01416
571	CDH24	CDH24	1.06292	11.8012	11.8892
572	CDH2	CDH2	0.833393	7.23787	6.97494
573	CDH3	CDH3	0.702668	7.78536	7.27628
574	CDH4	CDH4	1.13433	6.82123	7.00307
575	CDH8	CDH8	1.05897	6.75534	6.83801
576	CDH9	CDH9	0.897856	12.7133	12.5579
577	CD2BP2	CD2 Tail-binding	1.19836	6.31765	6.57872
578	CD302	CD302	1.4398	7.13281	7.65868
579	CDC16	APC6	1.3105	7.07996	7.47007
580	CDC20	p55CDC	1.4878	6.25228	6.82546
581	CDC37	p50 CDC37	1.50119	6.23304	6.81915
582	CDC6	CDC6	0.997124	7.26654	7.26238
583	CDCA2	CDCA2	1.06601	7.00256	7.09478
584	CDCA3	CDCA3	1.05059	7.07996	7.15117
585	CDCA4	CDCA4	1.12164	7.30849	7.4741
586	CDCA7	CDCA7	1.18783	6.6863	6.93463
587	CLIP1	CLIP1	1.20159	8.89499	9.15994
588	CHST10	CHST10	0.927679	6.91474	6.80644
589	CHST2	CHST2	0.617943	7.77874	7.08429
590	CHST6	CHST6	0.558334	7.77542	6.93463
591	CHST8	CHST8	0.76012	7.0473	6.65159
592	CA13	CA13	0.668578	7.75197	7.17113
593	CA14	CA14	1.15446	6.64323	6.85044
594	CA5B	CA5B	1.21038	6.86562	7.14108
595	CA6	CA6	1.41347	6.2618	6.76105
596	CBR3	CBR3	1.29427	6.38891	6.76105
597	CPB2	CPB2	1.09397	7.13281	7.26238
598	CPM	CPM	1.4096	6.58373	7.07902
599	CPN1	CPN1	1.43773	6.45682	6.98061
600	CNTROB	CNTROB	1.29658	6.43173	6.80644
601	CBLN1	CBLN1	1.18506	6.83405	7.07902
602	CBLN2	CBLN2	1.07097	6.92076	7.01968
603	CBLN3	CBLN3	1.08476	6.84042	6.9578
604	CBLN4	CBLN4	1.05836	6.67921	6.76105
605	CLN6	CLN6	1.1155	6.63593	6.79361
606	PIGY	PIGY	1.24517	6.71431	7.03065
607	PIP5K1C	PIP5K1C	0.910335	8.80829	8.67276
608	PIK3R5	PIK3R5	0.650353	7.48961	6.8689
609	PLA1A	PLA1A	0.640742	7.3358	6.69362
610	PLD4	PLD4	0.818711	7.13281	6.84424
611	SERPINA5	Serpin A5	0.711875	7.12762	6.63731
612	POLDIP3	POLDIP3	1.01977	6.84676	6.875
613	KCNK15	KCNK15	1.2486	6.28066	6.60097
614	KCNK17	KCNK17	1.2917	7.24269	7.61197
615	KCNK4	KCNK4	1.37094	6.29928	6.75444
616	KCNT1	KCNT1	1.26423	6.61379	6.95204
617	KCNA1	KCNA1	1.02868	8.37801	8.4188
618	KCND1	KCND1	1.32929	6.86562	7.27628
619	KCNG3	KCNG3	1.39096	6.74858	7.22466
620	KCNV2	KCNV2	1.23644	6.93274	7.23892
621	CDC40	CDC40	1.16074	6.67208	6.88713
622	SLU7	SLU7	1.15284	6.77542	6.98061
623	POTEG	A26C2/3	1.14377	6.73497	6.92877
624	POTEA	POTE8	1.11088	6.6863	6.83801
625	GRK6	GRK6	1.25975	6.4733	6.80644
626	CLK1	CLK1	1.17979	6.87185	7.11038
627	CLK2	CLK2	0.758672	7.24269	6.84424
628	CDKN1C	p57KIP2	0.710814	7.39758	6.90512
629	EFNA5	EFNA5	0.864071	7.03624	6.82546
630	EPHB4	EPHB4	0.779881	7.32221	6.96354
631	CDKN2D	p19 INK4d	1.12184	6.76876	6.93463
632	RPS6KA2	S6K-alpha2	1.51058	6.4733	7.06841
633	MAPK6	p97 MAPK	1.55698	6.66492	7.30367
634	MARK4	MARK4	1.51974	6.82123	7.42505
635	EPHA6	EPHA6	1.4121	7.05827	7.55611
636	YWHAB	14-3-3 beta	1.52199	6.75534	7.3613
637	YWHAE	14-3-3 epsilon	1.49708	6.4485	7.03065
638	CYB561D1	Cytochrome b561 D1	0.905696	12.4831	12.3402
639	HCCS	Cytochrome c-type Heme Lyase	1.28204	7.05827	7.41671
640	CFL2	Cofilin	1.12929	6.82765	7.00307
641	CYP1A1	Cytochrome P450 1A1/2	1.40093	6.97966	7.46604
642	CYP24A1	Cytochrome P450 24A1	1.21683	6.87806	7.16118
643	CYP27A1	Cytochrome P450 27A1	1.0579	6.77542	6.85662
644	IKBKE	IKBKE (IKK epsilon)	1.41518	6.45682	6.9578
645	KMT2A	MLL	1.08735	7.34926	7.47007
646	CALR	Calreticulin	0.849582	7.97966	7.74448
647	YES1	YES1	0.774506	6.96224	6.59359
648	GATA3	GATA3	0.966892	6.71431	6.66574
649	CANX	Calnexin	0.777733	7.2618	6.89915
650		cAMP	0.797023	8.72296	8.39565
651	GPI	Glucose-6-phosphate isomerase	1.49772	6.24269	6.82546
652	SRC	SRC	1.77956	6.0251	6.85662
653	IGFBP2	IGFBP2	1.44992	6.10134	6.63731
654	PTK2B	PYK2 (FAK2)	1.50516	6.2037	6.79361
655	PAWR	PAR4	1.55277	6.25228	6.88713
656	ITK	ITK (LYK)	1.60349	6.19378	6.875
657	ALCAM	ALCAM	1.33499	7.00823	7.42505
658	TNK1	TNK1	1.23897	6.74858	7.05772
659	CHEK2	CHK2	1.07714	6.95051	7.05772
660	SND1	SND1/P100	0.972405	9.16362	9.12325
661	MAP4K4	MAP4K4	1.1158	8.10663	8.26471
662	PARL	PARL	1.17364	6.3626	6.59359
663	CRYAB	CRYAB	1.14854	6.37143	6.57122
664	E2F2	E2F2	1.29784	6.59884	6.97494
665	TAF1A	TAF1A	0.760936	7.29928	6.90512
666	SMAD1	Smad1/5/9	0.757351	7.27597	6.875
667	MAP3K21	MAP3KL4	0.927263	8.24749	8.13854
668	PNCK	CaMK1-beta	0.743778	7.53744	7.11038
669	STRADA	STRAD	1.1267	6.85308	7.02518
670	SIAH1	SIAH1	1.49898	6.34479	6.92877
671	IP6K3	IP6K3	1.43666	7.07457	7.59728
672	RBAK	RBAK	1.38807	6.56846	7.04154
673	PIKFYVE	PIP5K	1.50426	6.3802	6.96925
674	FGF22	FGF22	0.859544	12.0579	11.8396
675	ERBB2	HER2	1.56513	6.4485	7.09478
676	ARF4	ARF4	1.51707	6.61379	7.21508
677	ATPAF2	ATPAF2	1.39411	6.58373	7.06307
678	TADA2A	ADA2L	1.06748	6.84042	6.93463
679	ACTL6A	ACTL6A	1.33858	6.82765	7.24835
680	ACVRL1	ACVL1	1.2024	6.6212	6.88713
681	ADK	ADK	1.31314	7.0195	7.41252
682	GFRA1	GFR alpha-1	1.25711	6.6505	6.98061
683	GAD1	GAD1/2	0.874116	11.3409	11.1468
684	DDIT3	GADD153	1.06482	7.5177	7.60831
685	LGALS3	Galectin 3	0.83225	8.24269	7.97778
686	MCM3AP	GANP	0.614593	7.42326	6.72097
687	GAST	Gastrin	0.835984	7.0195	6.76105
688	GCG	Glucagon	0.790479	7.13281	6.79361
689	GRM2	mGluR2/3	1.24809	10.7965	11.1162
690	GRM4	mGluR4	1.18452	8.09069	8.33499
691	GRIK1	GluR5	1.31933	6.45682	6.85662
692	GRM6	mGluR6	1.2847	6.40619	6.76762
693	GRM7	mGluR7	1.31995	6.79523	7.19571
694	GRM8	mGluR8	1.27172	6.57612	6.9229
695	SLC2A1	GLUT1	1.1344	8.66851	8.85044
696	SLC2A3	GLUT3	1.20586	6.59884	6.8689
697	GZMB	Granzyme B	1.14911	6.98542	7.18593
698	HSPA9	GRP75	1.16345	7.6505	7.8689
699	HSPA5	GRP78	0.922548	8.91474	8.79844
700	HSP90B1	GRP94	1.35799	6.67921	7.12069
701	PIAS1	PIAS1	1.29414	6.89039	7.26238
702	PIAS2	PIAS2	1.19126	6.40619	6.65868
703	PIAS3	PIAS3	1.00792	6.78866	6.80004
704	PIAS4	PIAS4	0.719817	7.41475	6.94046
705	SENP1	SENP1	0.71245	7.76542	7.27628
706	SENP2	SENP2	0.892475	7.76876	7.60464
707	SENP3	SENP3	0.589628	7.6249	6.86278
708	SENP5	SENP5	1.3136	6.48148	6.875
709	SENP6	SENP6	1.40231	6.42326	6.91107
710	SENP7	SENP7	1.24807	6.41475	6.73445
711	SENP8	SENP8	1.14714	6.57612	6.77416
712	SUMO1	Sumo1	1.25809	6.76876	7.1
713	TIMP4	TIMP4	1.22294	6.78866	7.07902
714	TNFRSF1A	TNF Receptor I	1.39444	6.32676	6.80644
715	TOP2B	TOP2B	1.1404	6.63593	6.82546
716	TRADD	TRADD	1.16241	6.90869	7.12581
717	TXNRD2	TRXR2	0.964497	8.22576	8.17361
718	TUBA1A	Tubulin alpha	0.91441	12.3997	12.2706
719	TUBB3	Tubulin beta	0.966219	9.06236	9.01278
720	MEF2C	MEF2C	1.37799	6.4485	6.91107
721	HMGXB3	SMF	1.2822	6.76207	7.12069
722	CDK5R2	CDK5R2	1.01002	6.90262	6.917
723	MTA1	MTA1	0.743461	7.91776	7.49008
724	TUSC3	TUSC3	0.69083	7.29464	6.76105
725	SMAD4	Smad4	0.743213	7.05827	6.63012
726	SERINC3	SERC3	0.785485	7.24749	6.89915
727	GAS6	GAS6	1.01458	6.88424	6.90512
728	CHD4	CHD4	1.36645	6.40619	6.85662
729	CDK5R1	CDK5R1	1.17725	6.3802	6.61562
730	IRF4	IRF4	1.20068	6.66492	6.92877
731	EPHA7	EPHA7	1.17725	6.6212	6.85662
732	TAF5	TAF5	1.31134	6.6505	7.04154
733	RHOH	RhoH	1.30805	7.05827	7.44569
734	GPR68	SPR1	1.11054	6.97966	7.13092
735	CEBPE	CEBPE	1.1925	7.15853	7.41252
736	MAPKAPK3	MAPK3	1.12638	7.09069	7.26238
737	DGKD	DGKD	1.29248	6.57612	6.94626
738	DOK7	DOK7	1.17914	6.71431	6.95204
739	CMKLR1	CMKLR1	1.49808	6.80829	7.3914
740	CNTD2	CNTD2	1.41534	6.99687	7.49801
741	COL1A2	Collagen I alpha2	1.0757	6.84676	6.95204
742	COL4A2	Collagen IV alpha2	0.684987	7.41475	6.8689
743	COL4A3	Collagen IV alpha3	0.825268	7.22333	6.94626
744	COL4A4	Collagen IV alpha4	0.768482	7.24269	6.86278
745	COL4A5	Collagen IV alpha5	0.747002	7.27126	6.85044
746	COL4A6	Collagen IV alpha6	1.13116	7.1483	7.32611
747	COL5A1	Collagen V alpha1	1.22976	6.74858	7.04695
748	COL5A2	Collagen V alpha2	1.11252	6.61379	6.76762
749	COL6A3	Collagen VI alpha3	1.18286	6.46508	6.70736
750	COL9A3	Collagen IX alpha3	1.25437	6.66492	6.99188
751	COL11A1	Collagen XI alpha1	1.14085	6.80178	6.99188
752	COL12A1	Collagen XII alpha1	1.31653	6.60633	7.00307
753	COL14A1	Collagen XIV alpha1	1.18494	7.00823	7.25305
754	COL18A1	Collagen XVIII alpha1	1.11537	6.92676	7.08429
755	COL19A1	Collagen XIX alpha1	1.02692	7.13281	7.17113
756	COL20A1	Collagen XX alpha1	1.07488	6.85936	6.96354
757	COL23A1	Collagen XXIII alpha1	1.26838	6.91474	7.25772
758	CLCC1	CLCC1	1.49061	6.70037	7.27628
759	CLIC3	CLIC3	1.38937	6.54525	7.01968
760	CLIC4	CLIC4	1.13785	6.94461	7.13092
761	CDYL2	CDYL2	0.891856	8.20123	8.03611
762	KIF4A	KIF4A	1.14612	8.71431	8.91107
763	CMTM2	CKLF2	0.814449	7.74179	7.44569
764	CLDN19	CLDN19	0.821056	7.35817	7.07372
765	CLDN6	CLDN6	0.771012	8.51372	8.13854
766	CSTF2T	CSTF2T	1.47156	6.50573	7.06307
767	CLASP1	CLASP1	1.26554	6.65773	6.99749
768	ST6GAL1	ST6GAL1	1.13641	6.80178	6.98626
769	DNPH1	RCL	1.25679	6.54525	6.875
770	COPZ1	COPZ1	1.19948	7.01387	7.27628
771	C1S	C1S	1.37116	6.43173	6.88713
772	CD55	CD55	0.971231	7.65773	7.61562
773	CNTN4	CNTN4	0.908033	6.76207	6.62288
774	CPNE8	CPNE8	0.951009	7.21355	7.14108
775	CXADR	CXADR	1.06772	6.97388	7.06841
776	CNGA2	CNGA2	1.06582	7.35372	7.44569
777	ENAH	ENAH	1.40045	7.08534	7.57122
778	PMS2CL	PMS2/PMS2CL	1.47549	6.97966	7.54085
779	IK	RED	1.23389	6.61379	6.917
780	S100A16	S100A16	0.911464	7.15342	7.01968
781	S100A3	S100A3	0.866335	7.35817	7.15117
782	S100Z	S100Z	0.839304	7.4774	7.22466
783	PC	PC	0.798033	7.36702	7.04154
784	PDK2	PDK2	0.532683	7.91172	7.00307
785	RABEP1	RABEP1	1.33929	6.48961	6.91107
786	RABEP2	RABEP2	1.11392	7.45267	7.60831
787	CHML	CHML	1.21247	6.6212	6.89915
788	RAB11FIP2	RAB11FIP2	1.271	6.67921	7.02518
789	RAB11FIP3	RAB11FIP3	1.25239	6.56846	6.89315
790	RAB11FIP4	RAB11FIP4	1.14719	9.48859	9.6867
791	RAB3GAP1	RAB3GAP1	1.02245	7.28066	7.31269
792	RAB3GAP2	RAB3GAP2	1.14104	6.87806	7.06841
793	RDX	RDX	1.03852	7.01387	7.06841
794	RASSF2	RASSF2	1.00392	8.52365	8.52929
795	RASSF4	RASSF4	1.21967	6.54525	6.83175
796	CYP2C18	Cytochrome P450 2C8/9/18/19	1.39579	6.95639	7.43747
797	CYP2C19	Cytochrome P450 2C19	1.79858	6.72812	7.57497
798	CYP2E1	Cytochrome P450 2E1	1.26289	6.51372	6.85044
799	CYP2R1	Cytochrome P450 2R1	1.09646	6.80178	6.93463
800	CYP2S1	Cytochrome P450 2S1	0.809654	7.38891	7.08429
801	CYP4Z1	Cytochrome P450 4Z1	0.967262	7.48961	7.44159
802	CYP7B1	Cytochrome P450 7B1	0.834929	7.15342	6.89315
803	MLH1	MLH1	0.763581	7.64687	7.25772
804	C9	C9	1.29319	6.79523	7.16617
805	GRB2	GRB2	1.35569	7.00256	7.44159
806	WEE2	WEE2	1.25813	7.0473	7.37858
807	SIAH2	SIAH2	1.2891	6.70736	7.07372
808		Cytochrome P450 3A7	1.31369	6.45682	6.85044
809	CYP2D6	Cytochrome P450 2D6	1.33858	6.82765	7.24835
810	H1FOO	Histone H1 (Acetyl-Lys25)	1.26619	7.1888	7.52929
811	H2AFZ	Histone H2A (Acetyl-Lys5)	1.05157	7.27126	7.34381
812	H2BFS	Histone H2B (Acetyl-Lys5)	1.0681	7.20863	7.30367
813	H2BFS	Histone H2B (Acetyl-Lys12)	0.908155	8.40834	8.26935
814	H2BFS	Histone H2B (Acetyl-Lys15)	1.06401	6.66492	6.75444
815	DDR1	DDR1	1.1405	7.15853	7.3482
816	MDM4	MDM4	1.33548	6.29	6.70736
817	AXL	AXL	1.31473	6.21355	6.60831
818	MST1R	RON	1.06824	6.50573	6.60097
819	F2R	PAR1	0.65018	9.59319	8.9721
820	CD33	CD33	0.936279	7.05279	6.9578
821	SOX2	SOX2	0.959898	6.87185	6.81281
822	ALB	human Albumin	0.955669	6.87185	6.80644
823	NCOA3	NCOA3	1.53648	6.10134	6.72097
824	KRT1	Keratin 1 (CK1)	1.44025	6.15342	6.67975
825	CER1	CER1	1.31016	6.29	6.67975
826	CD44	CD44	1.35539	6.2618	6.7005
827	CDKN1B	CDKN1B	1.4281	6.31765	6.83175
828	LPA	LPA	0.817534	8.32676	8.03611
829	PTPRC	CD45	1.3563	6.52957	6.96925
830	MPO	Myeloperoxidase	1.11036	6.79523	6.94626
831	MSTN	Myostatin	0.665425	9.55691	8.96925
832	IL2	IL-2	1.05006	6.6505	6.72097
833	RSPO1	R-spondin 1	1.26227	6.24269	6.57872
834	ADAR	ADAR1	1.33581	7.09602	7.51374
835	ADCK2	ADCK2	1.15305	8.70562	8.91107
836	ADCK1	ADCK1	1.14001	6.76876	6.9578
837	ACVR1C	ACTR-1C	1.2039	9.73326	10.001
838	COQ8A	ADCK3	0.692826	7.48148	6.95204
839	ADPGK	ADPGK	0.770615	7.44433	7.06841
840	ADNP	ADNP	0.99395	7.2618	7.25305
841	AATF	AATF	0.842416	7.53744	7.29004
842	ADRB1	ADRB1	1.44208	6.52957	7.05772
843	ACAD10	ACAD10	1.16257	8.00256	8.21988
844	ACBD6	ACBD6	1.2023	6.89039	7.15618
845	ACOT2	ACOT2	1.43652	6.14316	6.66574
846	ACOT4	ACOT4	1.41891	6.48148	6.98626
847	AARSD1	AARSD1	1.38088	6.90869	7.37428
848	ABCA8	ABCA8	1.21234	6.95639	7.23419
849	ABCB7	ABCB7	1.1509	7.15853	7.3613
850	ABCD1	ABCD1	0.893921	10.8558	10.694
851	AASDHPPT	AASDHPPT	1.00709	6.83405	6.84424
852	ACSL6	ACSL6	1.12571	6.77542	6.94626
853	GUCY1B1	Guanylate Cyclase beta	1.39202	6.80829	7.28547
854	BAD	BAD	1.13347	6.98542	7.16617
855	HDAC1	HDAC1	1.1001	6.70037	6.83801
856	HDAC10	HDAC10	0.847263	7.05827	6.81915
857	HDAC3	HDAC3	0.745975	7.68983	7.26703
858	HDAC5	HDAC5	0.966507	8.67565	8.6265
859	HDAC6	HDAC6	0.874406	7.34479	7.15117
860	HDAC7	HDAC7	0.859675	7.19875	6.98061
861	HDAC9	HDAC9	1.16595	6.5913	6.81281
862		Heregulin	1.04261	6.91474	6.97494
863	HSPE1	HSP10	1.03143	7.38456	7.4292
864	HSPH1	HSP105	1.32962	8.89039	9.30141
865	DNAJB1	HSP40	1.19601	6.98542	7.24365
866	HSPD1	HSP60	1.17642	6.89652	7.13092
867	HSP90AA1	HSP90A	0.948147	12.1459	12.0691
868	ITGB5	Integrin beta5	1.15092	6.86562	7.06841
869	IVL	Involucrin	1.06059	7.03068	7.11554
870	COPS3	JAB1	1.16309	7.19875	7.41671
871	PRAF2	JM4	1.19126	7.28066	7.53315
872	TUBG1	Tubulin gamma	1.34098	7.818	8.24129
873	TYR	Tyrosinase	1.24569	6.76207	7.07902
874	UBA2	UBA2	1.06279	6.6863	6.77416
875	UBA7	UBE1L	1.03837	8.28066	8.33499
876		Ubiquitin	0.91895	7.31765	7.19571
877	UCN	Urocortin	0.716807	7.46096	6.98061
878	USF2	USF2	0.878112	7.26654	7.07902
879	VEGFB	VEGFB	0.868073	8.3802	8.17608
880	VIM	Vimentin	0.894682	7.16362	7.00307
881	RPL10	60S Ribosomal Protein L10	1.14622	6.62858	6.82546
882	WNT1	WNT1	1.16912	6.60633	6.83175
883	XPA	DNA Repair Protein Complementing XP-a Cells (XPA)	1.18473	6.89652	7.14108
884	ERCC4	XPF	1.40632	6.67921	7.17113
885	XRCC1	XRCC1	1.7279	6.29	7.07902
886	XRCC2	XRCC2	1.24404	6.89039	7.20543
887	XRCC3	XRCC3	0.861838	7.69862	7.48411
888	XRCC4	XRCC4	1.09698	6.79523	6.92877
889	XRCC5	XRCC5	1.03875	6.6863	6.74115
890	XRCC6	XRCC6	1.22888	6.58373	6.88108
891	LRRK1	LRRK1	1.19092	6.66492	6.917
892	TKFC	DAK	1.20487	6.70037	6.96925
893	ADCK5	ADCK5	0.967026	6.72812	6.67975
894	FASTKD1	FAKD1	1.10246	6.67208	6.81281
895	SGO1	SGOL1	1.08052	7.17374	7.28547
896	DGKK	DGKK	0.680155	7.61379	7.05772
897	RBM26	RBM26	0.794463	7.3626	7.03065
898	STEAP3	STEA3	0.687029	7.36702	6.82546
899	STEAP4	STEAP4	0.714069	7.26654	6.78067
900	TNS3	TENS3	1.21649	6.82765	7.11038
901	RTL6	LDOC1L	1.2501	6.90262	7.22466
902	DOK6	DOK6	1.27683	6.6505	7.00307
903	KSR2	KSR2	1.23773	7.13799	7.44569
904	TSHZ1	TSH1	1.604	6.65773	7.33941
905	MARK2	MARK2	1.10723	6.92676	7.07372
906	DOK3	DOK3	1.05201	6.89039	6.96354
907	CTU1	ATBP3	1.18428	6.98542	7.22943
908	DGKH	DGKH	1.15568	6.5913	6.80004
909	BPIFA4P	LATH	1.10682	7.10663	7.25305
910	COL25A1	Collagen XXV alpha1	1.09839	6.72123	6.85662
911	COX11	COX11	1.08229	7.1483	7.26238
912	COX15	COX15	0.958946	6.80829	6.74781
913	COX17	COX17	1.01664	6.96807	6.99188
914	COX19	COX19	0.988889	6.97966	6.96354
915	COX4I1	COX41	0.799846	7.57993	7.25772
916	COX7A2P2	COX7S/A2	0.868463	7.26654	7.06307
917	CYP17A1	Cytochrome P450 17A1	0.80943	7.43594	7.13092
918	CYP19A1	Cytochrome P450 19A1	0.656193	7.83724	7.22943
919	CYP1A2	Cytochrome P450 1A2	1.18057	6.48148	6.72097
920	CYP26A1	Cytochrome P450 26A1	1.05897	7.75534	7.83801
921	CYP26C1	Cytochrome P450 26C1	1.2417	6.70736	7.01968
922	CYP2A6	Cytochrome P450 2A6	1.2024	6.6212	6.88713
923	CYP2A13	Cytochrome P450 2A13	1.50222	6.82123	7.40832
924	CYP2B6	Cytochrome P450 2B6	1.16791	8.83246	9.05638
925	CYP2C8	Cytochrome P450 2C8	1.18437	6.60633	6.85044
926	CYP2U1	Cytochrome P450 2U1	1.18628	6.91474	7.16118
927	CYP2W1	Cytochrome P450 2W1	1.1059	7.3802	7.52542
928	CYP3A43	Cytochrome P450 3A43	1.1551	6.55303	6.76105
929	CST9L	CST9L	1.02426	6.84042	6.875
930	CSTL1	CSTL1	0.981041	6.71431	6.6867
931	CST2	CST2	1.01624	6.81477	6.83801
932	CST1	CST1	0.972933	6.93274	6.89315
933	PLA2G4D	PLA2G4D	0.996993	6.95639	6.95204
934	PLA2G4E	PLA2G4E	0.677132	7.53744	6.97494
935	PLA2G4C	PLA2G4C	0.705607	7.32221	6.81915
936	GNPAT	GNPAT	0.872182	8.56077	8.36347
937	DMGDH	DMGDH	0.668973	8.10927	7.52929
938	POLE	POLE1	1.10682	6.6212	6.76762
939	POLI	POLI	0.934005	7.2037	7.1052
940	POLD3	POLD3	1.22761	6.56077	6.85662
941	POLG2	POLG2	1.18003	6.74179	6.98061
942	PRIM1	PRIM1	1.2847	6.72812	7.08955
943	CD3EAP	CD3EAP	1.23152	6.89039	7.19083
944	POLR3A	RPC1	1.09774	7.08534	7.21988
945	POLR3D	RPC4	1.0412	6.74179	6.80004
946	POLR3H	RPC8	1.07241	6.6863	6.78716
947	DNAJB11	DNAJB11	0.968133	6.84676	6.80004
948	RASSF6	RASSF6	1.02858	6.84042	6.88108
949	G3BP2	G3BP2	0.932793	6.94461	6.84424
950	RAB18	RAB18	1.04564	6.93869	7.00307
951	RAB20	RAB20	0.856968	7.42326	7.20058
952	RAB34	RAB34	0.969174	6.96807	6.9229
953	RAB37	RAB37	0.820374	7.66851	7.38286
954	RAB38	RAB38	0.605548	7.54915	6.82546
955	RAB40B	RAB40B	0.619146	8.41262	7.72097
956	RAB41	RAB41	0.576826	7.82445	7.03065
957	RAB5C	RAB5C	1.09121	6.56077	6.6867
958	RAB6A	RAB6A	1.06836	6.5913	6.6867
959	RAB6C	RAB6C	1.05687	6.70736	6.78716
960	RAB29	RAB7L1	1.02211	6.76207	6.79361
961	RGS1	RGS1	1.03924	6.89652	6.95204
962	UPF1	UPF1	1.17934	7.15342	7.3914
963	REN	REN	0.935208	8.82605	8.72941
964	RFPL4A	RFPL4A	1.12546	6.63593	6.80644
965	ALDH1A2	ALDH1A2	1.01026	6.89039	6.90512
966	ARHGAP17	RHG17	1.04148	6.73497	6.79361
967	HIST1H3A	Histone H3 (Acetyl-Lys9)	0.909073	7.03068	6.89315
968	HIST1H3A	Histone H3 (Acetyl-Lys18)	1.13053	6.72812	6.90512
969	HIST1H3A	Histone H3 (Acetyl-Lys23)	1.0289	7.17878	7.21988
970	HIST1H3A	Histone H3 (Acetyl-Lys27)	1.0308	7.1224	7.16617
971	HIST1H4A	Histone H4 (Acetyl-Lys5)	0.900878	7.0195	6.8689
972	HIST1H4A	Histone H4 (Acetyl-Lys8)	0.748199	7.31765	6.89915
973	HIST1H4A	Histone H4 (Acetyl-Lys12)	0.622658	8.58563	7.90214
974	C3AR1	C3AR1	0.55741	7.64323	6.80004
975	ACAN	Aggrecan (Cleaved-Asp369)	0.590829	7.81153	7.05235
976	Bad	BAD (Cleaved-Asp71)	0.981041	6.76876	6.74115
977	CASP3	Caspase 3 (Cleaved-Asp175)	1.09355	6.78206	6.91107
978	DFFA	DFF45 (Cleaved-Asp224)	0.914455	6.80178	6.67276
979	CASP1	IL-1beta (Cleaved-Asp210)	1.0093	6.93869	6.95204
980	NOTCH1	Notch 1 (Cleaved-Val1754)	1.17725	7.82765	8.06307
981	NOTCH2	Notch 2 (Cleaved-Asp1733)	1.02255	7.03624	7.06841
982	F10	FA10 (activated heavy chain,Cleaved-Ile235)	1.07195	7.03068	7.13092
983	ADAM17	ADAM 17 (Cleaved-Arg215)	0.896581	7.25228	7.09478
984	SPTAN1	SPTA2 (Cleaved-Asp1185)	1.12763	7.04178	7.21508
985	CASP3	CASP3 (p17,Cleaved-Asp175)	1.47784	11.3889	11.9524
986	CD37	CD37	0.91173	10.7439	10.6106
987	CHUK	IKK Alpha	1.01095	6.37143	6.38714
988	MYL2	MYL2	1.05229	6.49769	6.57122
989	WNT5A	WNT5A	0.985898	6.67208	6.65159
990	LPL	LPL	1.05749	6.86562	6.94626
991	NTRK1	TrkA	0.860188	7.1224	6.90512
992	CD80	CD80	0.824098	9.74009	9.46098
993	MYL3	MYL3	0.58729	7.21355	6.44569
994	ITGB2	CD18 (ITGB2)	0.720059	7.29928	6.82546
995	MUSK	MUSK	0.859496	6.83405	6.61562
996	SOD1	SOD1	0.969499	7.00823	6.96354
997	RPS27	MPS1	0.935762	8.03624	7.94046
998	PAK2	PAK2	1.07915	6.50573	6.61562
999	RTN3	RTN3	0.929577	7.26654	7.16118
1000	PDGFRB	PDGFR beta	1.32808	6.21355	6.62288
1001	PROZ	PROZ	0.808108	8.83086	8.52348
1002	ROR1	ROR1	0.990951	6.64323	6.63012
1003	PRTN3	Proteinase 3	1.22032	6.37143	6.65868
1004	TUBB3	TUBB3 (Tubulin beta 3)	0.70707	10.4259	9.92584
1005	SLC25A21	SLC25A21	0.928012	6.80829	6.7005
1006	SLC6A16	SLC6A16	1.23756	8.62858	8.93609
1007	SLC6A15	SLC6A15	1.18526	6.95051	7.19571
1008	AFP	Alpha Fetoprotein (AFP)	0.75502	9.48046	9.07505
1009	B2M	beta-2-Microglobulin	1.05992	6.6505	6.73445
1010	PSG2	CEA	0.919131	6.70037	6.57872
1011	FTH1	Ferritin	0.754418	8.37582	7.96925
1012	KLK3	Free PSA (KLK3)	0.601283	7.13799	6.40411
1013	KLK3	Total PSA	0.686356	7.05279	6.50982
1014	KLK3	PSA-ACT	0.806127	7.0251	6.71418
1015	FSHB	FSH	0.922179	9.11716	9.00028
1016	CGA	alpha hCG	1.18088	6.35372	6.59359
1017		beta hCG	0.947705	6.70037	6.62288
1018	CGA	hCG	1.23442	6.25228	6.55611
1019	GH1	HGH	1.19202	6.55303	6.80644
1020	INS	Insulin	0.960242	7.15853	7.1
1021	LHB	LH	1.05229	6.49769	6.57122
1022	PRL	Prolactin	1.07964	6.6505	6.76105
1023	SHBG	Testosterone	0.857956	14.5888	14.3678
1024	KRT15	Keratin 15	0.993173	10.2582	10.2484
1025	KRT16	Keratin 16	1.01704	6.78206	6.80644
1026	KRT17	Keratin 17	1.28477	7.34926	7.71077
1027	KRT18	Keratin 18	1.09158	7.16362	7.29004
1028	KRT19	Keratin 19	1.18288	6.72123	6.96354
1029	KRT20	Keratin 20	1.04718	7.07457	7.14108
1030	KRT5	Keratin 5	0.680983	7.8625	7.30819
1031	KRT7	Keratin 7	0.586369	7.45682	6.6867
1032	KRT8	Keratin 8	0.729799	7.37143	6.917
1033	KRT10	Keratin 10	0.991225	7.1888	7.17608
1034	MKI67	Ki67	1.19677	6.5913	6.85044
1035	NOS2	iNOS	1.00399	8.43173	8.43747
1036	XRCC5	Ku70/80	1.01014	6.89652	6.91107
1037	XRCC6	Ku70	1.22361	6.52167	6.81281
1038	MAGEA1	MAGE-1	1.17207	7.25705	7.4861
1039	SCGB2A2	Mammaglobin	1.17061	6.70736	6.93463
1040	SCGB2A1	Mammaglobin B	1.16903	7.39758	7.62288
1041	MLANA	MART-1	1.16499	7.10134	7.32165
1042	MCL1	MCL1	1.24801	7.26654	7.58617
1043	TAF4	TAF4	1.05908	6.4733	6.55611
1044	CDC7	CDC7	0.992448	7.0251	7.01416
1045	VWA5A	LHR2A	1.18239	6.85308	7.09478
1046	CDK2AP1	CDKA1	1.16163	6.66492	6.88108
1047	TP53I11	TP53I11	1.07091	7.0473	7.14613
1048	TNFSF11	TNF11	1.03592	7.17374	7.22466
1049	BACH1	BACH1	0.729921	7.20863	6.75444
1050	MAST4	MAST4	0.616867	7.64323	6.94626
1051	EPHB6	EPHB6	0.687283	7.48148	6.94046
1052	TP73	p73	0.799467	7.51372	7.19083
1053	MAP3K13	M3K13	1.33265	6.83405	7.24835
1054	TPD52L2	TPD54	1.13801	6.82765	7.01416
1055	TNFSF12	TNF12	1.01838	7.1888	7.21508
1056	TNFSF14	TNF14	1.259	6.50573	6.83801
1057	BUB1	BUB1	1.1286	6.95639	7.13092
1058	AIRE	AIRE	1.62998	8.0195	8.72435
1059	EFNA2	EFNA2	1.33321	6.6212	7.03611
1060	MAST3	MAST3	1.17289	6.82765	7.05772
1061	NEMF	SDCG1	1.26246	6.98542	7.32165
1062	MAP4K3	MAP4K3	1.0924	6.54525	6.67276
1063	CDKL3	CDKL3	0.981041	6.70736	6.67975
1064	TUSC5	TUSC5	1.0829	6.52957	6.64447
1065	Tp53inp2	TP53INP2	1.14531	6.76207	6.9578
1066	CCAR2	KIAA1967	1.16527	6.74858	6.96925
1067	MINK1	MAP4K6	1.05272	6.78866	6.86278
1068	CSNK1A1L	CKI-alpha1/L	0.76875	7.26654	6.88713
1069	CAMKV	CAMK5	0.593714	7.45267	6.7005
1070	HIPK4	HIPK4	0.690565	7.49769	6.96354
1071	PPHLN1	PPHLN	0.817534	7.35372	7.06307
1072	STEAP2	STEA2	1.35915	6.59884	7.04154
1073	AGR3	AGR3	1.19076	7.1224	7.37428
1074	MAPK15	MAPK15	0.954996	7.41901	7.35258
1075	BRSK1	BRSK1	1.18902	6.97966	7.22943
1076	DOK4	DOK4	1.10367	6.59884	6.74115
1077	GRK7	GRK7	1.1524	6.85308	7.05772
1078	ORAOV1	ORAV1	1.1334	8.81962	9.00028
1079	MADD	MADD	1.36645	6.40619	6.85662
1080	CNKSR2	CNKR2	1.26922	6.3358	6.67975
1081	CYP39A1	Cytochrome P450 39A1	1.14131	6.67208	6.86278
1082	CYP3A4	Cytochrome P450 3A4/5	1.06138	6.87185	6.9578
1083	CYP4F2	Cytochrome P450 4F2	1.15143	6.58373	6.78716
1084	CYP4X1	Cytochrome P450 4X1	1.23004	6.63593	6.93463
1085	CYTL1	CYTL1	1.16345	6.6505	6.8689
1086	DNAJB4	DNAJB4	1.06724	6.91474	7.00863
1087	FGF18	FGF18	0.696323	7.32221	6.80004
1088	FRS3	FRS3	0.591868	7.5177	6.76105
1089	GRID2	GRID2	0.662069	7.52957	6.93463
1090	HSPB2	HSPB2	0.830575	7.3626	7.09478
1091	IL20RB	IL20RB	1.06425	6.82123	6.91107
1092	MAPK9	MAPK9	1.07683	7.22819	7.33499
1093	ANAPC1	Cyclosome 1	1.09941	7.94756	8.08429
1094	PRKAB1	PRKAB1	1.18638	6.76207	7.00863
1095	BARD1	BARD1	1.25239	6.56846	6.89315
1096	BCL2L2	BCLW	1.23554	6.91474	7.21988
1097	CIDEB	CIDEB	1.20813	6.76876	7.04154
1098	DCC	DCC	1.38882	6.38891	6.86278
1099	DFFA	DFFA	1.13771	7.05279	7.23892
1100	DNAL1	DNAL1	1.14281	6.56846	6.76105
1101	DNAL4	DNAL4	0.976681	6.82765	6.79361
1102	MARCH2	March2	1.33481	7.3802	7.79683
1103	MARCH3	March3	1.25682	6.77542	7.1052
1104	MARCH4	March4	1.08431	6.72123	6.83801
1105	MARCH5	March5	0.996801	6.97388	6.96925
1106	MYLIP	MYLIP	1.14121	9.38347	9.57404
1107	COP1	RFWD2	0.633935	7.89652	7.23892
1108	UBR1	UBR1	1.14625	9.68718	9.8841
1109	ELOVL3	ELOVL3	0.703079	7.50573	6.99749
1110	ELOVL4	ELOVL4	0.790917	7.0251	6.6867
1111	ELOVL5	ELOVL5	1.0421	6.92676	6.98626
1112	EXOG	ENDOGL1	1.12725	6.71431	6.88713
1113	EPHB1	EPHB1/2/3	1.07379	7.11716	7.21988
1114	EPN3	EPN3	1.16719	6.6212	6.84424
1115	FKBPL	FKBPL	1.06483	8.34479	8.43541
1116	FOXJ3	FOXJ3	1.23397	7.01387	7.31718
1117	FOXN4	FOXN4	1.36665	6.4485	6.89915
1118	FOXR1	FOXR1	1.17075	6.51372	6.74115
1119	ARHGAP22	RHG22	1.03214	6.59884	6.64447
1120	ARHGAP9	RHG9	1.0522	6.60633	6.67975
1121	ARHGEF10	ARHGEF10	1.11088	6.6863	6.83801
1122	ARHGEF12	ARHGEF12	1.07511	7.2037	7.30819
1123	ARHGEF3	ARHGEF3	0.881994	6.71431	6.53315
1124	ARHGEF5	ARHGEF5	0.841336	7.31765	7.06841
1125	ARHGEF9	ARHGEF9	0.591598	7.3802	6.62288
1126	ARHGEF2	ARHGEF2	0.60264	7.72812	6.99749
1127	RHOBTB3	RHOBTB3	0.638578	7.58752	6.94046
1128	SEPT2	Septin-2	0.618156	7.62858	6.93463
1129	SEPT7	Septin-7	0.687059	7.22819	6.6867
1130	SEPT8	Septin-8	0.950142	7.00256	6.92877
1131	SPINK6	SPINK6	1.03601	6.87185	6.9229
1132	STK24	STK24	1.07447	6.72812	6.83175
1133	STK36	STK36	1.12622	6.81477	6.98626
1134	PLK2	PLK2	1.17046	7.45267	7.67975
1135	PLK3	PLK3	1.2019	6.5913	6.85662
1136	PLK5	PLK5	1.08154	7.69335	7.80644
1137	PRKX	PRKX	1.16019	6.85936	7.07372
1138	CTSD	CATD (light chain,Cleaved-Gly65)	1.02213	6.5913	6.62288
1139	CTSD	CATD (heavy chain,Cleaved-Leu169)	1.09646	7.1888	7.32165
1140	CTSG	CATG (Cleaved-Ile21)	1.09744	6.89652	7.03065
1141	CTSL	CATL1 (heavy chain,Cleaved-Thr288)	1.13113	7.07996	7.25772
1142	CTSV	CATL2 (Cleaved-Leu114)	0.909038	6.78206	6.64447
1143	CTSZ	CATZ (Cleaved-Leu62)	0.977574	7.15853	7.12581
1144	CD97	CD97beta (Cleaved-Ser531)	0.660881	7.39758	6.80004
1145	F12	FA12 (heavy chain,Cleaved-Arg372)	0.63802	8.17374	7.52542
1146	F13A1	FA13A (Cleaved-Gly39)	0.588625	7.58373	6.81915
1147	COL3A1	Collagen III alpha1 (Cleaved-Gly1221)	0.620566	7.76207	7.07372
1148	COL1A2	Collagen I alpha2 (Cleaved-Gly1102)	0.598773	8.19378	7.45386
1149	COL4A3	Collagen IV alpha3 (Cleaved-Leu1425)	1.02336	7.00823	7.04154
1150	COL4A3	Collagen IV alpha3 (Cleaved-Pro1426)	0.949826	6.79523	6.72097
1151	C1R	C1R (light chain,Cleaved-Ile464)	1.11879	7.2037	7.36564
1152	C1S	C1S (heavy chain,Cleaved-Arg437)	1.05872	7.4275	7.50982
1153	CFB	CFAB Bb (Cleaved-Lys260)	1.15988	6.59884	6.81281
1154	MASP1	MASP1 (heavy chain,Cleaved-Arg448)	1.15613	7.4774	7.6867
1155	CTSC	Dipeptidyl-peptidase 1 (heavy chain,Cleaved-Arg394)	0.996864	7.29	7.28547
1156	F7	FA7 (light chain,Cleaved-Arg212)	1.14706	6.6212	6.81915
1157	FOXA2	FOXA2	1.06005	6.23304	6.31718
1158	NEUROG3	Neurogenin-3	0.867626	6.4485	6.24365
1159	NKX2-5	NKX2.5	0.981041	6.6505	6.62288
1160	DAXX	DAXX	1.0756	6.38891	6.49405
1161	MATK	MATK (CTK)	1.05787	6.38891	6.47007
1162	WNT10B	WNT 10B	0.954407	6.80178	6.73445
1163	NOS3	eNOS	0.619605	7.34926	6.65868
1164	JAK3	JAK3	0.675589	7.10663	6.54085
1165	DDX4	DDX4	0.491843	7.54915	6.52542
1166	ITGA5	Integrin alpha-5 (ITGA5)	0.599339	7.20863	6.47007
1167	CD38	CD38	0.598406	7.4275	6.6867
1168	EGF	EGF	1.02632	6.6212	6.65868
1169	NGFR	NGFR	0.981041	6.58373	6.55611
1170	AKT2	AKT2	1.01738	6.76876	6.79361
1171	RCHY1	Pirh2 (RCHY1)	1.10617	6.62858	6.77416
1172	CSF1	CSF-1 (MCSF)	0.801414	8.48555	8.16617
1173	MAP2K2	MAP2K2 (MEK2)	1.14354	6.3626	6.55611
1174	PARP1	PARP	0.909132	6.5913	6.45386
1175	CD247	CD247 (CD3Z)	1.18623	6.27126	6.51764
1176	TSHB	TSH	1.0689	6.07996	6.17608
1177	CRP	CRP	1.03837	6.28066	6.33499
1178		IgA	1.00468	6.38891	6.39565
1179		IgE	1.06026	6.34479	6.4292
1180		IgM	0.914616	6.59884	6.47007
1181		IgG	0.84226	6.69335	6.44569
1182	PKM	PKM2	0.648816	6.98542	6.3613
1183	LAMC3	Laminin	0.562508	7.20863	6.37858
1184	FN1	Fibronectin	0.599706	7.24749	6.50982
1185		Hepatitis B Surface Antigen	0.515838	7.29	6.33499
1186	IL13RA1	CA19-9	0.461666	7.42326	6.30819
1187	MUC1	CA 15-3	0.955523	7.4485	7.38286
1188	ZAP70	ZAP70	0.954527	6.54525	6.47811
1189	KIT	C-Kit	1.02582	6.92676	6.96354
1190	GSK3A	GSK3 alpha	1.04066	6.51372	6.57122
1191	IGF1R	IGF 1R	1.0086	6.48961	6.50196
1192	BIRC5	Survivin	1.12756	6.28066	6.45386
1193	KDR	KDR (VEGFR2)	0.896952	6.46508	6.30819
1194	PTEN	PTEN	1.08615	6.40619	6.52542
1195	MCM2	MCM2	0.827608	6.73497	6.46199
1196	MCM5	MCM5	0.968189	6.85308	6.80644
1197	MDM2	MDM2	0.981041	6.90262	6.875
1198	MMP1	MMP-1	0.906318	7.68276	7.54085
1199	MMP10	MMP-10	0.949982	9.85308	9.77905
1200	MMP11	MMP-11	1.01205	7.45682	7.4741
1201	MMP13	MMP-13	0.756333	7.49769	7.09478
1202	MMP14	MMP-14	0.773251	7.1838	6.81281
1203	MMP15	MMP-15	0.761405	7.40189	7.00863
1204	MMP16	MMP-16	0.659523	7.49365	6.89315
1205	MMP19	MMP-19	0.704337	7.88424	7.37858
1206	MMP2	MMP-2	1.61646	9.33918	10.032
1207	MMP23A	MMP-23	0.965948	7.03624	6.98626
1208	MMP3	MMP-3	0.985401	6.82765	6.80644
1209	MMP7	MMP-7	1.01257	7.14316	7.16118
1210	MMP8	MMP-8	1.04313	7.31765	7.37858
1211	MMP9	MMP-9	1.12894	6.6505	6.82546
1212	NCK2	NCK2	0.931765	6.78866	6.6867
1213	NKX3-1	NKX3.1	1.04268	7.5913	7.65159
1214	BUB1B	BUB1B	1.07471	6.6505	6.75444
1215	REV3L	DNA Polymerase zeta	1.00744	6.81477	6.82546
1216	PFKFB2	6-Phosphofructo-2-Kinase	1.05439	6.75534	6.83175
1217	DKC1	Dyskerin	1.01158	7.0195	7.03611
1218	SLC43A1	LAT3	1.02484	7.40619	7.44159
1219	TACC1	TACC1	1.19018	7.0251	7.27628
1220	POLQ	DNA Polymerase theta	0.76901	7.29	6.91107
1221	TAF5L	TAF5L	0.677119	7.79195	7.22943
1222	CIB2	CIB2	0.601076	7.84992	7.11554
1223	TNFSF13	TALL-2	0.580906	7.92975	7.14613
1224	TUSC2	TUSC2	0.435649	8.21844	7.01968
1225	CDK2AP2	CDKA2	0.549477	7.71431	6.85044
1226	MAP4K4	MEKKK 4	1.00005	7.0251	7.02518
1227	TOP3B	TOP3B	1.09306	7.1888	7.31718
1228	PTTG1	PTTG1	1.04669	7.08534	7.15117
1229	ABL1	ABL1	1.20652	6.96807	7.23892
1230	TNF	TNFA	0.785702	11.0803	10.7324
1231	TK1	KITH	0.926029	6.75534	6.64447
1232	CDK1	CDC2	0.948461	7.09602	7.01968
1233	BRI3BP	BRI3B	0.994064	6.83405	6.82546
1234	SEPT1	Septin-1	0.840446	7.30849	7.05772
1235	TFAP2C	AP2C	0.95379	6.76876	6.7005
1236	CDKL2	CDKL2	0.929767	7.17878	7.07372
1237	TAF15	TAF15	1.04102	6.85308	6.91107
1238	MAP4K1	MEKKK 1	1.14973	6.80178	7.00307
1239	HIST1H2BH	Histone H2B	0.913992	7.13281	7.00307
1240	TP53INP1	TP53INP1	0.924019	9.57802	9.46402
1241	SLC22A18	ORCTL-2	0.655504	7.80504	7.19571
1242	ITPKC	IP3KC	0.678139	8.36039	7.80004
1243	FAM84B	FAM84B	0.439095	7.96807	6.78067
1244	CIB3	CIB3	0.472664	7.88115	6.80004
1245	SERINC2	SERC2	1.05998	7.04178	7.12581
1246	MAP3K3	MAP3K3	0.970786	7.17878	7.13601
1247	FOXB1	FOXB1/2	1.09542	6.81477	6.94626
1248	ATF6B	ATF6B	1.29482	6.96224	7.33499
1249	PKIB	IPKB	1.12258	6.66492	6.83175
1250	PBOV1	PBOV1	1.03292	6.71431	6.76105
1251	ILKAP	ILKAP	1.28815	6.85936	7.22466
1252	GZMH	GRAH	0.930632	6.99687	6.89315
1253	EIF4G2	EIF4G2	0.931097	7.11716	7.01416
1254	LAMA3	LAMA3	0.985163	6.90869	6.88713
1255	LAMA4	LAMA4	1.05824	7.26654	7.3482
1256	LAMA5	LAMA5	1.09055	6.76207	6.88713
1257	LAMB2	LAMB2	1.09534	7.28534	7.41671
1258	LAMB3	LAMB3	1.00804	7.36702	7.37858
1259	LAMC3	LAMC3	1.00574	7.13281	7.14108
1260	LGALS4	LEG4	0.585114	7.98829	7.21508
1261	LGALS7	LEG7	0.55599	7.94165	7.09478
1262	LGALS9	LEG9	0.454256	8.0195	6.88108
1263	MGMT	MGMT	0.690751	8.14573	7.61197
1264	TRAF3IP1	MIPT3	0.949826	6.79523	6.72097
1265	MLH3	MLH3	0.94834	7.09069	7.01416
1266	MSH2	MSH2	1.0963	7.52957	7.66222
1267	MSH3	MSH3	1.11719	6.95051	7.11038
1268	MSH6	MSH6	1.10575	6.89652	7.04154
1269	MUTYH	MUTYH	0.955967	7.30389	7.23892
1270	NF1	NF1	1.14455	6.99115	7.18593
1271	FMN2	FMN2	1.00652	6.86562	6.875
1272	ALDOB	ALDOB	0.976602	6.80178	6.76762
1273	ALDOC	ALDOC	1.06161	6.70736	6.79361
1274	KCNJ9	KCNJ9	1.07837	6.99115	7.1
1275	GPRIN1	GPRIN1	1.04722	6.99115	7.05772
1276	GPRIN2	GPRIN2	1.06494	9.39433	9.48511
1277	GPRIN3	GPRIN3	0.830381	7.14316	6.875
1278	GABRA6	GABRA6	0.984919	6.99687	6.97494
1279	GABRG1	GABRG1	0.588625	7.87496	7.11038
1280	GGH	GGH	0.531759	7.83405	6.9229
1281	TUBGCP3	TUBGCP3	0.852279	8.92076	8.69016
1282	TUBGCP4	TUBGCP4	0.437805	8.11454	6.9229
1283	TUBGCP5	TUBGCP5	0.881153	7.11716	6.93463
1284	TUBGCP6	TUBGCP6	0.85471	7.97098	7.74448
1285	GADD45GIP1	GADD45GIP1	1.08604	7.23787	7.35695
1286	GRB14	GRB14	1.25917	12.5616	12.8941
1287	GRTP1	GRTP1	1.00277	10.3177	10.3216
1288	GAS1	GAS1	1.26533	7.73155	8.07107
1289	ERAS	ERAS	1.18082	7.11716	7.35695
1290	PRKY	PRKY	1.05836	6.67921	6.76105
1291	SIK3	QSK	0.948475	6.92676	6.85044
1292	SRPK1	SRPK1	0.969943	7.80178	7.75775
1293	TNNI3K	TNNI3K	1.06199	7.25705	7.34381
1294	ULK3	ULK3	1.07061	6.85936	6.9578
1295	SERPINB7	SERPINB7	1.0518	7.26654	7.33941
1296	SERPINB9	SERPINB9	1.36314	12.0045	12.4514
1297	SAA4	SAA4	0.981041	6.96807	6.94046
1298	SESN1	SESN1	0.567855	7.80829	6.99188
1299	SHD	SHD	0.575924	7.82123	7.02518
1300	SHC2	SHC2	0.477167	8.11978	7.05235
1301	SHC3	SHC3	0.523907	7.5913	6.65868
1302	SIRPB1	SIRPB1	0.874704	7.17374	6.98061
1303	SIRPG	SIRPG	0.944828	7.23304	7.15117
1304	SLC6A6	SLC6A6	1.05231	6.88424	6.9578
1305	SLC4A11	SLC4A11	1.1671	7.45682	7.67975
1306	SLC5A2	SLC5A2	1.20626	7.0195	7.29004
1307	SLC9A7	SLC9A7	1.0321	7.08534	7.13092
1308	SLC9A9	SLC9A9	1.08625	7.44433	7.56369
1309	GGT7	Gamma-glutamyltransferase 4 (heavy chain,Cleaved-Thr472)	1.15829	6.90869	7.12069
1310	ITGAV	ITGAV (heavy chain,Cleaved-Lys889)	1.02244	6.90262	6.93463
1311	KLK11	Kallikrein-11 (Cleaved-Ile54)	1.04583	6.74179	6.80644
1312	CTSA	PPGB (32k,Cleaved-Arg326)	1.07776	6.74858	6.85662
1313	MMP17	MMP17 (Cleaved-Gln129)	1.05171	6.89652	6.96925
1314	KLK8	Neuropsin (Cleaved-Val33)	1.03407	7.03068	7.07902
1315	NOTCH2	Notch 2 (Cleaved-Ala1734)	0.85	7.12762	6.89315
1316	NOTCH2	Notch 2 (Cleaved-Val1697)	0.933762	6.97388	6.875
1317	PARP1	PARP (Cleaved-Gly215)	0.685327	8.46508	7.91995
1318	KLKB1	KLKB1 (heavy chain,Cleaved-Arg390)	0.658699	8.8436	8.24129
1319	F2RL3	PAR4 (Cleaved-Gly48)	0.507055	7.81153	6.83175
1320	F2	THRB (AP2,Cleaved-Arg327)	0.652288	7.56846	6.95204
1321	MAP3K6	MAP3K6	0.995191	6.71431	6.70736
1322	MAP3K9	MAP3K9	1.16791	6.99115	7.21508
1323	MAP3K10	MAP3K10	1.01064	6.87185	6.88713
1324	MAP3K1	MAP3K1	1.06577	6.79523	6.88713
1325	MAP3K4	MAP3K4	1.09095	6.92676	7.05235
1326	FADD	FADD	1.14954	7.0473	7.24835
1327		Lys-acetylated proteins	1.11991	6.78866	6.95204
1328	CD69	CD69	1.27408	6.28066	6.63012
1329	CDC25C	CDC25C	1.06279	6.50573	6.59359
1330	CSF2	CSF2 (GM-CSF)	1.00303	7.49365	7.49801
1331	PTH	PTH (Parathyroid Hormone )	1.02721	6.42326	6.46199
1332	NKX3-1	NKX3A	1.04502	6.53744	6.60097
1333	EGR1	EGR1	1.15568	6.5913	6.80004
1334	ICAM1	ICAM1	0.808451	6.76876	6.46199
1335	CD3E	CD3E	0.868783	6.66492	6.46199
1336	SNAI2	SNAI2 (SLUG)	0.615073	7.33129	6.63012
1337	JAK2	JAK2	0.642633	7.17878	6.54085
1338	BMX	BMX (ETK)	0.453661	7.4485	6.30819
1339	VCAM1	Vascular Cell Adhesion Molecule 1 (VCAM1)/CD106	0.542248	7.11716	6.23419
1340	MUM1	MUM1	0.734607	7.72123	7.27628
1341	EPCAM	EPCAM	1.0026	6.52167	6.52542
1342	PTK2	FAK	1.01896	6.70736	6.73445
1343	A1BG	A1BG	0.903794	7.00256	6.85662
1344	ERN1	ERN1 (IRE1)	0.933107	9.5979	9.49801
1345	GATA1	GATA1	1.15994	6.42326	6.63731
1346	FABP4	FABP4	1.18914	6.3802	6.63012
1347	RELA	NF-kB p65	1.14752	6.3802	6.57872
1348	GSK3B	GSK3 beta	1.04684	6.37143	6.43747
1349	AR	Androgen receptor	0.764448	6.86562	6.47811
1350	FLT1	Flt-1 (VEGFR1)	0.835211	6.80829	6.5485
1351	FGF1	FGF-1	0.853371	6.2037	5.97494
1352	FGF2	FGF-2	0.915638	6.3802	6.25305
1353	IL1A	IL-1 alpha	0.744962	6.56077	6.13601
1354	IL1B	IL-1 beta	0.845725	6.67921	6.43747
1355	ANGPT1	Angiopoietin-1	0.635558	7.24749	6.59359
1356	ANGPT2	Angiopoietin-2	0.603963	7.27597	6.5485
1357	CD40LG	CD154 (sCD40-Ligand)	0.44243	7.49365	6.31718
1358	MUC16	CA125	0.542704	7.15342	6.27166
