# Supplementary material for: Promoting axon regeneration by enhancing the non-coding function of the injury-responsive coding gene Gpr151
Source: Research Square preprint supplement (doi:10.21203/rs.3.rs-269886/v1), 2021-03-10
Supplement: Supplementary file 6 [file a8d6125d66b9d257f344e5e9.xlsx]

## Sheet: S4_related_to_figure5E
Cataegory	Term	Gene count	%	Pvalue	Genes
mmu03010	Ribosome	35	4.56323	1.90925e-22	RPL17, RPL19, GM2000, RPL13, RPL27A, RPL35, RPL36, RPL37, RPL38, GM11361, RPS3, RPS25, RPS26, GM11808, RPL31, RPL9, RPLP0, RPL5, RPL11, RPS21, RPS24, RPL36AL, RPSA, RPL26, RPL24, RPS6, RPS5, RPS8, RPL28, RPS18, RPS19, RPL18A, RPL23, RPL13A, RPS14, UBC, RPS10, UBB, RPS11, UBA52
mmu05010	Alzheimer's disease	25	3.25945	8.05147e-06	NDUFB4, CDK5R1, ATP5B, PPP3R1, ATP5G1, NDUFS7, APP, MAPT, PPP3CB, COX6B1, PPP3CA, PLCB1, GM10358, GAPDH, NDUFS1, NDUFA4, NDUFA9, NDUFC2, COX6C, SDHB, GNAQ, UQCRH, GSK3B, CALM3, CACNA1C, CALM2, UQCRB, CALM1
mmu05016	Huntington's disease	25	3.25945	8.85928e-06	NDUFA4, NDUFB4, NDUFA9, CREB1, ATP5B, CREBBP, NDUFC2, CREB5, ATP5G1, CLTC, POLR2C, DCTN1, COX6C, NDUFS7, SDHB, AP2B1, EP300, HDAC2, GNAQ, UQCRH, COX6B1, PLCB1, NDUFS1, AP2M1, UQCRB
mmu04120	Ubiquitin mediated proteolysis	18	2.34681	0.000335473	UBE2A, UBE2Z, XIAP, UBE3A, UBE2G1, DDB1, FBXO2, CBL, BIRC6, STUB1, RBX1, TRIM37, FBXW7, HUWE1, NEDD4, UBA1, UBE2W, TRIP12
mmu04810	Regulation of actin cytoskeleton	18	2.34681	0.0385477	ACTB, FGFR2, LIMK2, ROCK1, MAP2K2, SSH2, ABI2, ARPC4, NCKAP1, ARPC1A, CDC42, PFN2, PAK3, CFL1, CYFIP2, PIK3CA, TMSB4X, PIP4K2B
mmu04144	Endocytosis	17	2.21643	0.0402815	FGFR2, PRKCZ, CBL, PSD3, CLTC, EPS15, CDC42, SMAP2, AP2B1, NEDD4, SH3GLB1, NTRK1, HGS, AGAP1, HSPA8, AP2M1, PIP4K2B
mmu05012	Parkinson's disease	16	2.08605	0.00215069	NDUFA4, NDUFB4, NDUFA9, UBE2G1, ATP5B, NDUFC2, ATP5G1, COX6C, NDUFS7, SDHB, GM11808, UQCRH, UBA1, COX6B1, UBC, UBB, NDUFS1, UBA52, UQCRB
mmu04722	Neurotrophin signaling pathway	15	1.95567	0.00457358	YWHAZ, GRB2, MAP2K2, CAMK2G, MAGED1, CDC42, YWHAG, YWHAH, MAP3K3, GSK3B, NTRK1, CALM3, PIK3CA, SORT1, SHC2, CALM2, CALM1
mmu04310	Wnt signaling pathway	15	1.95567	0.0147142	PPP2R1A, ROCK1, CAMK2G, PPP2R5D, CREBBP, PPP3R1, RBX1, CTNNBIP1, CSNK2A1, EP300, GSK3B, PRICKLE2, PPP3CB, PPP3CA, PLCB1
mmu00190	Oxidative phosphorylation	14	1.82529	0.0113467	NDUFA4, NDUFB4, NDUFA9, ATP5B, NDUFC2, ATP5G1, ATP6V1B2, COX6C, NDUFS7, SDHB, UQCRH, COX6B1, NDUFS1, UQCRB
mmu05215	Prostate cancer	13	1.69492	0.00142098	FGFR2, HSP90AB1, HSP90AA1, GRB2, MAP2K2, CREB1, CREBBP, CREB5, HSP90B1, CDKN1A, EP300, GSK3B, PIK3CA
mmu04916	Melanogenesis	13	1.69492	0.00351231	A, MAP2K2, CREB1, CAMK2G, CREBBP, MITF, KITL, EP300, GNAQ, GSK3B, CALM3, GNAS, PLCB1, CALM2, CALM1
mmu04910	Insulin signaling pathway	13	1.69492	0.0389233	PRKCZ, GRB2, MAP2K2, PHKG1, CBL, RPS6, PRKAR2B, EIF4E, GSK3B, PRKAR1B, PIK3CA, CALM3, SHC2, CALM2, CALM1
mmu04114	Oocyte meiosis	12	1.56454	0.0256919	PPP2R1A, YWHAZ, PPP2R5D, CAMK2G, PPP3R1, RBX1, YWHAG, YWHAH, PPP3CB, CALM3, PPP3CA, CALM2, SMC1B, CALM1
mmu04360	Axon guidance	12	1.56454	0.0576628	SEMA5B, CDC42, NRP1, ROCK1, LIMK2, PAK3, GSK3B, CFL1, PPP3CB, PPP3R1, SEMA4D, PPP3CA
mmu04720	Long-term potentiation	11	1.43416	0.00207816	MAP2K2, CAMK2G, CREBBP, PPP3R1, EP300, GNAQ, PPP3CB, CALM3, PPP3CA, PLCB1, CACNA1C, CALM2, CALM1
mmu04012	ErbB signaling pathway	11	1.43416	0.0100399	CDKN1A, NRG3, PAK3, MAP2K2, GRB2, CAMK2G, GSK3B, CBL, PIK3CA, NRG1, SHC2
mmu04660	T cell receptor signaling pathway	11	1.43416	0.0650308	CDC42, PAK3, MAP2K2, GRB2, GSK3B, CBL, PPP3CB, PPP3R1, CTLA4, PIK3CA, PPP3CA
mmu04912	GnRH signaling pathway	10	1.30378	0.0488125	CDC42, MAP3K3, GNAQ, MAP2K2, GRB2, CAMK2G, CALM3, GNAS, CACNA1C, PLCB1, CALM2, CALM1
mmu04260	Cardiac muscle contraction	9	1.1734	0.0373023	CACNA2D1, ATP1B1, UQCRH, COX6B1, ATP1A3, CACNA1C, COX6C, UQCRB, TPM3
mmu05211	Renal cell carcinoma	8	1.04302	0.0557627	CDC42, EP300, PAK3, MAP2K2, GRB2, CREBBP, PIK3CA, RBX1
mmu04662	B cell receptor signaling pathway	8	1.04302	0.0983082	MAP2K2, GRB2, GSK3B, CD81, PPP3CB, PPP3R1, PIK3CA, PPP3CA
mmu05014	Amyotrophic lateral sclerosis (ALS)	7	0.912647	0.0602794	PRPH, PPP3CB, PPP3R1, NEFH, PPP3CA, NEFL, NEFM
mmu05214	Glioma	7	0.912647	0.0941243	CDKN1A, MAP2K2, GRB2, CAMK2G, CALM3, PIK3CA, SHC2, CALM2, CALM1
