# Supplementary material for: Promoting axon regeneration by enhancing the non-coding function of the injury-responsive coding gene Gpr151
Source: Research Square preprint supplement (doi:10.21203/rs.3.rs-269886/v1), 2021-03-10
Supplement: Supplementary file 8 [file 9bf8406a2c39c110cfcbddba.xlsx]

## Sheet: S6_related_to_figure5G
Total: 982	Fold change	Normalized data (log2)		CSDE1 dissociation factor	Color code
Gene Symbol	5'UTRm/Control	Control	5'UTRm
ARFIP1	2.58896	10.9836	12.356	0	Red
ITGA7	1.97741	6.59884	7.58245	0	Red
ITGA5	1.79858	6.6863	7.53315	0	Red
SRC	1.77956	6.0251	6.85662	0	Red
XRCC1	1.7279	6.29	7.07902	0	Red
FHIT	1.70981	6.46508	7.23892	1	Red
NFKBIA	1.70754	6.54525	7.31718	0	Red
EEF1G	1.7022	6.25228	7.01968	2.32193	closed Red
FOXE1	1.68957	6.1838	6.94046	0	Red
PPP1R8	1.68788	6.34479	7.1	0	Red
CDK8	1.64356	6.28066	6.99749	0.847997	Red
CARD19	1.63697	6.44014	7.15117	0	Red
MARK3	1.628	6.54525	7.24835	0	Red
POU3F1	1.62516	6.64323	7.34381	0	Red
KAT8	1.62504	6.3626	7.06307	0	Red
NTM	1.62485	6.3358	7.03611	1.32193	closed Red
MMP2	1.61646	9.33918	10.032	0	Red
RPS6KA1	1.6112	6.11191	6.80004	0	Red
AMACR	1.60837	6.21355	6.89915	0	Red
TSHZ1	1.604	6.65773	7.33941	0	Red
ITK	1.60349	6.19378	6.875	0	Red
UBR5	1.59939	6.3802	7.05772	0	Red
FGFR2	1.59915	6.4485	7.12581	1.58496	closed Red
ITGA6	1.59522	6.90869	7.58245	0	Red
NSG2	1.5875	6.3802	7.04695	0	Red
KLHL3	1.58685	6.77542	7.44159	1	Red
SNAP25	1.58291	6.3626	7.02518	0.584963	Red
NLE1	1.56967	6.29	6.94046	0	Red
ADD2	1.5624	6.35372	6.99749	1	Red
COL1A2	1.56175	6.81477	7.45793	0	Red
SAE1	1.55812	6.56077	7.20058	0	Red
CSNK1A1	1.55747	6.48148	7.12069	1	Red
MAPK6	1.55698	6.66492	7.30367	1	Red
FER	1.55687	6.53744	7.17608	0	Red
PAWR	1.55277	6.25228	6.88713	0	Red
TUFM	1.54967	6.30849	6.94046	0	Red
ACTN1	1.54081	6.42326	7.04695	0	Red
S100B	1.53745	6.07996	6.7005	1.58496	closed Red
NCOA3	1.53648	6.10134	6.72097	1	Red
ADCY6	1.52907	6.19378	6.80644	0	Red
YWHAB	1.52199	6.75534	7.3613	0.584963	Red
MARK4	1.51974	6.82123	7.42505	0	Red
ARF4	1.51707	6.61379	7.21508	1	Red
RPS6KA2	1.51058	6.4733	7.06841	1	Red
SLC25A12	1.5066	9.75197	10.3433	0	Red
PTK2B	1.50516	6.2037	6.79361	0	Red
PIKFYVE	1.50426	6.3802	6.96925	0	Red
CDC37	1.50119	6.23304	6.81915	0	Red
YWHAE	1.49708	6.4485	7.03065	0	Red
DDR2	1.49524	6.19378	6.77416	0	Red
CLCC1	1.49061	6.70037	7.27628	0	Red
CDC20	1.4878	6.25228	6.82546	0	Red
ARFGEF2	1.48266	6.80178	7.36996	0	Red
MERTK	1.48157	6.21355	6.78067	0	Red
CASP3	1.47784	11.3889	11.9524	0	Red
CYB5R1	1.47654	7.63593	8.19815	0	Red
SNCG	1.4762	7.32221	7.8841	2.32193	closed Red
CSTF2T	1.47156	6.50573	7.06307	0	Red
CIB1	1.47156	6.44014	6.99749	0	Red
POLB	1.46543	6.3358	6.88713	0	Red
HRAS	1.46248	6.76876	7.31718	0	Red
BST2	1.46169	6.23304	6.78067	0	Red
TNXB	1.46141	6.19378	6.74115	0	Red
ADCY7	1.46082	6.11191	6.65868	0	Red
SCN1A	1.45974	6.38891	6.93463	0	Red
EFNA2	1.45588	6.78866	7.33055	1	Red
NHLH1	1.45559	6.76207	7.30367	0	Red
ADGRE1	1.45377	6.60633	7.14613	0	Red
NCOA7	1.45245	6.28066	6.81915	1.32193	closed Red
IGFBP2	1.44992	6.10134	6.63731	0	Red
NRBF2	1.44969	6.30849	6.84424	0	Red
SYP	1.4482	6.57612	7.11038	1	Red
KRT1	1.44025	6.15342	6.67975	0	Red
CD302	1.4398	7.13281	7.65868	1.58496	closed Red
ACOT2	1.43652	6.14316	6.66574	0	Red
CDKN1B	1.4281	6.31765	6.83175	0	Red
YAP1	1.42744	6.57612	7.08955	0	Red
SNCB	1.42605	6.61379	7.12581	0	Red
NFRKB	1.4254	6.42326	6.93463	0	Red
ACOT4	1.41891	6.48148	6.98626	0	Red
IKBKE	1.41518	6.45682	6.9578	0	Red
EPHA6	1.4121	7.05827	7.55611	0	Red
CREM	1.41115	6.67921	7.17608	0	Red
CPM	1.4096	6.58373	7.07902	0	Red
CDK7	1.40913	6.3802	6.875	0	Red
ERCC4	1.40632	6.67921	7.17113	0	Red
EZR	1.4051	6.29	6.78067	0	Red
SENP6	1.40231	6.42326	6.91107	1	Red
CYP1A1	1.40093	6.97966	7.46604	0	Red
ENAH	1.40045	7.08534	7.57122	1	Red
EIF4EBP1	1.40036	5.96807	6.45386	0	Red
MAPK3	1.39943	7.10134	7.58617	0	Red
TNFRSF1A	1.39444	6.32676	6.80644	0	Red
ATPAF2	1.39411	6.58373	7.06307	0	Red
MAP2K6	1.39185	6.3358	6.81281	0	Red
KCNG3	1.39096	6.74858	7.22466	0	Red
DCC	1.38882	6.38891	6.86278	0	Red
RBAK	1.38807	6.56846	7.04154	0	Red
AARSD1	1.38088	6.90869	7.37428	0	Red
GRK5	1.37959	6.3358	6.80004	1	Red
MEF2C	1.37799	6.4485	6.91107	0	Red
KCNK4	1.37094	6.29928	6.75444	0	Red
FOSL2	1.37	6.84042	7.2946	0	Red
CHD4	1.36645	6.40619	6.85662	0	Red
MADD	1.36645	6.40619	6.85662	0	Red
SERPINB9	1.36314	12.0045	12.4514	0	Red
ADCY8	1.36157	6.3802	6.82546	0	Red
STEAP2	1.35915	6.59884	7.04154	0	Red
HSP90B1	1.35799	6.67921	7.12069	1.58496	closed Red
CLDN10	1.35719	6.60633	7.04695	0	Red
GRB2	1.35569	7.00256	7.44159	2	closed Red
CD44	1.35539	6.2618	6.7005	1	Red
AIFM2	1.34745	6.38891	6.81915	1	Red
CSTB	1.34745	6.38891	6.81915	0	Red
STAT3	1.34662	6.74179	7.17113	0.584963	Red
BRCA2	1.34653	6.6863	7.11554	1	Red
ELOVL1	1.34336	6.4733	6.89915	0	Red
TUBG1	1.34098	7.818	8.24129	0	Red
RABEP1	1.33929	6.48961	6.91107	1	Red
ACTL6A	1.33858	6.82765	7.24835	1	Red
ADAR	1.33581	7.09602	7.51374	0	Red
MDM4	1.33548	6.29	6.70736	2.80735	closed Red
ALCAM	1.33499	7.00823	7.42505	1	Red
BRAF	1.33493	6.78866	7.20543	1	Red
MARCH2	1.33481	7.3802	7.79683	0	Red
BCL2L11	1.3336	6.59884	7.01416	0	Red
EFNA2	1.33321	6.6212	7.03611	1	Red
MAP3K13	1.33265	6.83405	7.24835	0.807355	Red
HSPH1	1.32962	8.89039	9.30141	1.58496	closed Red
KCND1	1.32929	6.86562	7.27628	0	Red
TGM2	1.32849	6.59884	7.00863	0	Red
PRKN	1.3284	6.72123	7.13092	1	Red
CASP4	1.32818	6.6212	7.03065	0	Red
PDGFRB	1.32808	6.21355	6.62288	0	Red
FGFR1OP	1.32124	7.55303	7.95493	0	Red
E2F6	1.32028	6.75534	7.15618	0	Red
GRM7	1.31995	6.79523	7.19571	0	Red
GRIK1	1.31933	6.45682	6.85662	0	Red
CDC42BPB	1.31809	6.3626	6.76105	1	Red
COL12A1	1.31653	6.60633	7.00307	0	Red
TAF6L	1.31524	6.52167	6.917	0	Red
AXL	1.31473	6.21355	6.60831	0	Red
SENP5	1.3136	6.48148	6.875	0.584963	Red
ADK	1.31314	7.0195	7.41252	0	Red
CARD6	1.31294	6.66492	7.05772	0	Red
TAF5	1.31134	6.6505	7.04154	0	Red
CDC16	1.3105	7.07996	7.47007	0	Red
CER1	1.31016	6.29	6.67975	0	Red
NFYC	1.30021	7.56462	7.94336	0	Red
CTNNB1	1.29942	7.06372	7.44159	0	1
CNTROB	1.29658	6.43173	6.80644	0	1
ATF6B	1.29482	6.96224	7.33499	0	1
CBR3	1.29427	6.38891	6.76105	0	1
PIAS1	1.29414	6.89039	7.26238	0	1
DGKD	1.29248	6.57612	6.94626	0	1
CAV1	1.29148	11.2409	11.6099	0	1
CASP2	1.29111	6.60633	6.97494	0	1
IRAK3	1.28922	6.5913	6.9578	0	1
SIAH2	1.2891	6.70736	7.07372	0	1
ILKAP	1.28815	6.85936	7.22466	0	1
GADD45B	1.28729	6.57612	6.94046	0	1
CHEK1	1.2855	6.19378	6.55611	0	1
ERF	1.2855	6.45682	6.81915	0	1
PRIM1	1.2847	6.72812	7.08955	0	1
HMGXB3	1.2822	6.76207	7.12069	1	1
ELK1	1.28204	6.4733	6.83175	0	1
HCCS	1.28204	7.05827	7.41671	0	1
MYH14	1.28136	6.21355	6.57122	0	1
DOK6	1.27683	6.6505	7.00307	1	1
GRM8	1.27172	6.57612	6.9229	2.32193	1
RIT1	1.27126	10.2099	10.5561	0	1
RAB11FIP2	1.271	6.67921	7.02518	0	1
MYC	1.26929	6.61379	6.9578	0	1
CNKSR2	1.26922	6.3358	6.67975	2	1
KCNMB2	1.26856	11.7307	12.0739	0	1
COL23A1	1.26838	6.91474	7.25772	0	1
CABLES2	1.26701	6.96224	7.30367	0	1
PTGS1	1.2656	10.2025	10.5423	0	1
CLASP1	1.26554	6.65773	6.99749	1	1
KCNT1	1.26423	6.61379	6.95204	0	1
CYP2E1	1.26289	6.51372	6.85044	0	1
NEMF	1.26246	6.98542	7.32165	1	1
RSPO1	1.26227	6.24269	6.57872	0	1
EFNA3	1.2621	6.54525	6.88108	0	1
GRK6	1.25975	6.4733	6.80644	0	1
GRB14	1.25917	12.5616	12.8941	1.58496	1
ARSA	1.25909	6.56077	6.89315	0	1
SUMO1	1.25809	6.76876	7.1	0	1
GFRA1	1.25711	6.6505	6.98061	0	1
MARCH3	1.25682	6.77542	7.1052	0	1
DNPH1	1.25679	6.54525	6.875	0	1
CASP8	1.25424	6.90262	7.22943	0	1
RAB11FIP3	1.25239	6.56846	6.89315	0	1
BARD1	1.25239	6.56846	6.89315	0	1
RTL6	1.2501	6.90262	7.22466	1	1
SENP7	1.24807	6.41475	6.73445	0	1
MCL1	1.24801	7.26654	7.58617	0	1
TYR	1.24569	6.76207	7.07902	1	1
XRCC2	1.24404	6.89039	7.20543	0	1
RET	1.24382	6.40619	6.72097	1	1
FOS	1.2429	7.06916	7.38286	0	1
SUMO2	1.24132	7.21355	7.52542	0	1
TNK1	1.23897	6.74858	7.05772	0	1
KSR2	1.23773	7.13799	7.44569	0	1
SLC6A16	1.23756	8.62858	8.93609	0	1
ATF5	1.23631	6.62858	6.93463	1	1
SYK	1.23596	7.00256	7.30819	0	1
TOP2A	1.23573	6.71431	7.01968	0	1
BCL2L2	1.23554	6.91474	7.21988	0	1
FOXJ3	1.23397	7.01387	7.31718	0	1
IK	1.23389	6.61379	6.917	1	1
CSK	1.23344	6.70037	7.00307	0	1
MVK	1.23259	7.10663	7.40832	1.58496	1
ARPP21	1.23211	6.73497	7.03611	0	1
ERCC5	1.23163	6.53744	6.83801	0	1
CD3EAP	1.23152	6.89039	7.19083	0	1
USP13	1.23066	6.41475	6.71418	1	1
CYP4X1	1.23004	6.63593	6.93463	1	1
COL5A1	1.22976	6.74858	7.04695	0	1
RAN	1.22951	6.85308	7.15117	0	1
XRCC6	1.22888	6.58373	6.88108	0	1
EPHB2	1.22878	6.64323	6.94046	0	1
POLD3	1.22761	6.56077	6.85662	0	1
SVOP	1.22485	6.41475	6.70736	0	1
CYCS	1.22413	6.83405	7.12581	0	1
EPCAM	1.22366	7.13799	7.4292	0	1
XRCC6	1.22361	6.52167	6.81281	0	1
PRTN3	1.22032	6.37143	6.65868	0	1
CDH10	1.22012	6.90869	7.19571	0	1
RASSF4	1.21967	6.54525	6.83175	0	1
ARSK	1.21912	6.91474	7.20058	1	1
NCOR1	1.21902	6.67208	6.9578	1	1
TNS3	1.21649	6.82765	7.11038	0	1
VANGL1	1.21564	6.53744	6.81915	1	1
RELA	1.21488	7.52563	7.80644	0	1
SNCA	1.21424	6.94461	7.22466	1	1
DYSF	1.21413	7.15342	7.43334	0	1
ACTR3	1.21339	6.58373	6.86278	0.736966	1
EGFR	1.21268	6.1838	6.46199	0	1
CHML	1.21247	6.6212	6.89915	0	1
ABHD12B	1.21111	6.83405	7.11038	0	1
RCBTB1	1.2087	10.0432	10.3166	0	1
SERINC1	1.20836	6.95639	7.22943	1	1
CIDEB	1.20813	6.76876	7.04154	0	1
ATG4B	1.20663	6.56077	6.83175	0	1
ABL1	1.20652	6.96807	7.23892	0	1
SLC5A2	1.20626	7.0195	7.29004	0	1
MRC2	1.2062	6.52957	6.80004	0	1
SLC2A3	1.20586	6.59884	6.8689	0	1
ATF1	1.20556	6.66492	6.93463	0	1
FES	1.20506	7.00256	7.27166	0	1
TKFC	1.20487	6.70037	6.96925	0	1
ACVR1C	1.2039	9.73326	10.001	0	1
ACVRL1	1.2024	6.6212	6.88713	0	1
ACBD6	1.2023	6.89039	7.15618	0	1
PLK3	1.2019	6.5913	6.85662	0	1
CLIP1	1.20159	8.89499	9.15994	0	1
ACTN2	1.19992	6.98542	7.24835	0	1
COPZ1	1.19948	7.01387	7.27628	1	1
CD2BP2	1.19836	6.31765	6.57872	0	1
USP6NL	1.19755	6.19378	6.45386	1	1
ST5	1.19737	6.6212	6.88108	0	1
DNAJB1	1.19601	6.98542	7.24365	0	1
CLDN7	1.19552	6.96224	7.21988	0	1
PAWR	1.19243	6.51372	6.76762	0	1
MMP14	1.1921	6.98542	7.23892	0	1
ABHD11	1.19163	6.5913	6.84424	0	1
PIAS2	1.19126	6.40619	6.65868	0	1
PRAF2	1.19126	7.28066	7.53315	0	1
GPR173	1.19126	6.90869	7.16118	1	1
TACC1	1.19018	7.0251	7.27628	0	1
UBE3B	1.18931	6.49769	6.74781	0	1
HNF4A	1.18925	8.04454	8.2946	0	1
BRSK1	1.18902	6.97966	7.22943	1.58496	1
CDCA7	1.18783	6.6863	6.93463	0	1
POLL	1.18638	6.76207	7.00863	0	1
PRKAB1	1.18638	6.76207	7.00863	0	1
CYP2U1	1.18628	6.91474	7.16118	1	1
CD247	1.18623	6.27126	6.51764	0	1
SLC6A15	1.18526	6.95051	7.19571	0	1
CBLN1	1.18506	6.83405	7.07902	0	1
COL14A1	1.18494	7.00823	7.25305	0	1
XPA	1.18473	6.89652	7.14108	1.58496	1
CTU1	1.18428	6.98542	7.22943	0	1
CYB5R3	1.18317	6.6505	6.89315	0	1
COL6A3	1.18286	6.46508	6.70736	0	1
VWA5A	1.18239	6.85308	7.09478	0	1
POLG2	1.18003	6.74179	6.98061	1	1
CLK1	1.17979	6.87185	7.11038	0	1
UPF1	1.17934	7.15342	7.3914	0	1
MYO1D	1.17909	6.74858	6.98626	0	1
NOTCH1	1.17725	7.82765	8.06307	0	1
CDK5R1	1.17725	6.3802	6.61562	1.58496	1
EPHA7	1.17725	6.6212	6.85662	0	1
HSPD1	1.17642	6.89652	7.13092	2	1
GABBR1	1.17622	6.5913	6.82546	3	1
PARL	1.17364	6.3626	6.59359	1	1
MAST3	1.17289	6.82765	7.05772	0	1
NME2	1.17264	8.67387	8.90363	0	1
PLK2	1.17046	7.45267	7.67975	0	1
CYB561D2	1.17024	7.14316	7.36996	0	1
YWHAZ	1.1689	6.56846	6.79361	4.39232	1
MAPK1	1.16819	7.97388	8.19815	0	1
MAP3K9	1.16791	6.99115	7.21508	0	1
H2AFX	1.16752	6.93274	7.15618	1	1
EPN3	1.16719	6.6212	6.84424	0	1
SLC4A11	1.1671	7.45682	7.67975	0	1
HDAC9	1.16595	6.5913	6.81281	0	1
CCAR2	1.16527	6.74858	6.96925	0	1
MLANA	1.16499	7.10134	7.32165	0	1
HSPA9	1.16345	7.6505	7.8689	1	1
COPS3	1.16309	7.19875	7.41671	0	1
CCNE1	1.16298	7.11716	7.33499	0	1
ACAD10	1.16257	8.00256	8.21988	0	1
TRADD	1.16241	6.90869	7.12581	1	1
PRPH	1.16185	11.483	11.6994	2.24793	1
CDK2AP1	1.16163	6.66492	6.88108	0	1
CDC40	1.16074	6.67208	6.88713	0	1
APAF1	1.16043	6.46508	6.67975	1	1
WASF3	1.16027	7.29928	7.51374	1	1
PRKX	1.16019	6.85936	7.07372	1	1
CFB	1.15988	6.59884	6.81281	0	1
NPTN	1.15987	8.21109	8.42505	2	1
TLE2	1.15981	6.82765	7.04154	0	1
PPRC1	1.15941	6.72123	6.93463	0	1
GGT7	1.15829	6.90869	7.12069	0	1
FASTKD2	1.15775	6.34479	6.55611	0	1
MPRIP	1.15701	6.81477	7.02518	1.58496	1
MASP1	1.15613	7.4774	7.6867	0	1
MAP2K4	1.15575	6.2037	6.41252	0	1
DGKH	1.15568	6.5913	6.80004	0.847997	1
EGR1	1.15568	6.5913	6.80004	0	1
FOXP3	1.15534	6.63593	6.84424	0	1
ERCC6	1.15399	8.33805	8.54468	0	1
STAT1	1.15351	7.78866	7.99469	0	1
ADCK2	1.15305	8.70562	8.91107	0	1
SLU7	1.15284	6.77542	6.98061	0	1
WDHD1	1.15261	6.81477	7.01968	0	1
SLC39A7	1.15226	6.74179	6.94626	0	1
LIMK1	1.15166	6.53744	6.74115	1	1
ITGB5	1.15092	6.86562	7.06841	1	1
ABCB7	1.1509	7.15853	7.3613	2.32193	1
MAP4K1	1.14973	6.80178	7.00307	0	1
FADD	1.14954	7.0473	7.24835	0	1
CRYAB	1.14854	6.37143	6.57122	0	1
STMN4	1.14792	6.61379	6.81281	1	1
ATF3	1.14782	6.65773	6.85662	0	1
RELA	1.14752	6.3802	6.57872	0	1
RAB11FIP4	1.14719	9.48859	9.6867	0	1
SENP8	1.14714	6.57612	6.77416	1	1
UBR1	1.14625	9.68718	9.8841	0	1
RPL10	1.14622	6.62858	6.82546	1	1
NF1	1.14455	6.99115	7.18593	0	1
POTEG	1.14377	6.73497	6.92877	0	1
MAP2K2	1.14354	6.3626	6.55611	1.58496	1
DNAL1	1.14281	6.56846	6.76105	0	1
CASP6	1.14182	7.50573	7.69707	0	1
ADRA2C	1.14131	6.67208	6.86278	0	1
CYP39A1	1.14131	6.67208	6.86278	0	1
MYLIP	1.14121	9.38347	9.57404	0	1
RAB3GAP2	1.14104	6.87806	7.06841	0	1
COL11A1	1.14085	6.80178	6.99188	0	1
DDR1	1.1405	7.15853	7.3482	0	1
TOP2B	1.1404	6.63593	6.82546	0.584963	1
KCNC2	1.14008	9.06508	9.25422	1.58496	1
ADCK1	1.14001	6.76876	6.9578	1	1
TPD52L2	1.13801	6.82765	7.01416	1	1
CLIC4	1.13785	6.94461	7.13092	0	1
DFFA	1.13771	7.05279	7.23892	0	1
ST6GAL1	1.13641	6.80178	6.98626	0	1
TLE4	1.13532	6.96807	7.15117	1	1
SLC2A1	1.1344	8.66851	8.85044	0	1
CDH4	1.13433	6.82123	7.00307	0	1
H1F0	1.13389	7.4774	7.65868	0	1
BAD	1.13347	6.98542	7.16617	0	1
GJA1	1.13308	7.09602	7.27628	0	1
APC	1.1325	7.16869	7.3482	0.584963	1
AVEN	1.13235	6.66492	6.84424	0	1
EFNA1	1.13197	6.80178	6.98061	0	1
COL4A6	1.13116	7.1483	7.32611	0	1
CTSL	1.13113	7.07996	7.25772	0	1
MME	1.13006	6.31765	6.49405	0	1
ATP6V1H	1.12934	6.44014	6.61562	1	1
CFL2	1.12929	6.82765	7.00307	0	1
MMP9	1.12894	6.6505	6.82546	0	1
BUB1	1.1286	6.95639	7.13092	0	1
ADD3	1.1282	6.65773	6.83175	1	1
NEDD8	1.12793	6.56077	6.73445	0	1
SPTAN1	1.12763	7.04178	7.21508	0.321928	1
BIRC5	1.12756	6.28066	6.45386	0	1
EXOG	1.12725	6.71431	6.88713	0	1
STRADA	1.1267	6.85308	7.02518	0	1
CDKN2B	1.12664	7.15853	7.33055	0	1
MAPKAPK3	1.12638	7.09069	7.26238	0	1
STK36	1.12622	6.81477	6.98626	0	1
ACSL6	1.12571	6.77542	6.94626	0	1
ATP5H	1.12511	8.49567	8.66574	0.584963	1
COL18A1	1.12361	9.32789	9.49603	0	1
PKIB	1.12258	6.66492	6.83175	1	1
CDKN2D	1.12184	6.76876	6.93463	1	1
CDCA4	1.12164	7.30849	7.4741	0	1
NUB1	1.12048	6.63593	6.80004	0	1
PMP22	1.11939	7.29928	7.46199	0	1
UBAP2L	1.11908	6.6505	6.81281	0	1
HAT1	1.119	7.01387	7.17608	0	1
STK39	1.11758	6.61379	6.77416	1	1
MSH3	1.11719	6.95051	7.11038	0	1
IKBKG	1.11717	6.72123	6.88108	1	1
CDH11	1.11654	6.51372	6.67276	0	1
ETNK2	1.11588	6.73497	6.89315	0	1
MAP4K4	1.1158	8.10663	8.26471	1	1
CLN6	1.1155	6.63593	6.79361	0	1
HSF2	1.11548	7.09069	7.24835	0	1
CNN2	1.11543	6.78866	6.94626	0	1
COL18A1	1.11537	6.92676	7.08429	0	1
RABEP2	1.11392	7.45267	7.60831	0	1
MAPK11	1.11387	13.5447	13.7003	0	1
GPR174	1.11252	6.61379	6.76762	0	1
COL5A2	1.11252	6.61379	6.76762	0	1
MEF2B	1.11102	7.32221	7.4741	0	1
ARHGEF10	1.11088	6.6863	6.83801	0	1
GPR68	1.11054	6.97966	7.13092	0	1
MNAT1	1.11013	6.84676	6.99749	0	1
UNG	1.1093	7.15853	7.30819	0	1
PTGER3	1.10915	7.19875	7.3482	2	1
MARK2	1.10723	6.92676	7.07372	0	1
RORA	1.10691	7.06372	7.21026	1	1
POLE	1.10682	6.6212	6.76762	0	1
RCHY1	1.10617	6.62858	6.77416	0	1
MSH6	1.10575	6.89652	7.04154	0	1
DOK4	1.10367	6.59884	6.74115	1.58496	1
FASTKD1	1.10246	6.67208	6.81281	0	1
HDAC1	1.1001	6.70037	6.83801	0	1
ANAPC1	1.09941	7.94756	8.08429	0	1
COL25A1	1.09839	6.72123	6.85662	0	1
POLR3A	1.09774	7.08534	7.21988	1	1
PIGH	1.09771	6.54525	6.67975	0	1
XRCC4	1.09698	6.79523	6.92877	0	1
CTSD	1.09646	7.1888	7.32165	1	1
MSH2	1.0963	7.52957	7.66222	0	1
LAMB2	1.09534	7.28534	7.41671	0	1
CPB2	1.09397	7.13281	7.26238	0	1
CASP3	1.09355	6.78206	6.91107	0	1
TOP3B	1.09306	7.1888	7.31718	0	1
MAP4K3	1.0924	6.54525	6.67276	1	1
TIMP2	1.09165	6.6863	6.81281	1	1
RAB5C	1.09121	6.56077	6.6867	0	1
MAP3K4	1.09095	6.92676	7.05235	0	1
ATF7	1.09057	6.70037	6.82546	1	1
PTCH1	1.08914	11.8576	11.9808	0	1
CREBBP	1.08806	6.79523	6.917	1.58496	1
KMT2A	1.08735	7.34926	7.47007	2	1
SLC9A9	1.08625	7.44433	7.56369	0	1
PTEN	1.08615	6.40619	6.52542	1	1
GADD45GIP1	1.08604	7.23787	7.35695	0	1
CBLN3	1.08476	6.84042	6.9578	0	1
MARCH4	1.08431	6.72123	6.83801	0	1
COX11	1.08229	7.1483	7.26238	0	1
INHA	1.08218	8.19875	8.31269	0	1
CAMK2B	1.08197	6.93869	7.05235	0	1
PDRG1	1.08166	6.88424	6.99749	0	1
PLK5	1.08154	7.69335	7.80644	0	1
SLC27A4	1.0807	7.80504	7.917	0	1
EPHA1	1.07985	7.13281	7.24365	0	1
PAK2	1.07915	6.50573	6.61562	0	1
KCNJ9	1.07837	6.99115	7.1	0	1
CTSA	1.07776	6.74858	6.85662	0	1
CTNNA1	1.07726	11.0572	11.1646	0	1
CHEK2	1.07714	6.95051	7.05772	0	1
ABHD14A	1.07701	6.53744	6.64447	0	1
MAPK9	1.07683	7.22819	7.33499	1	1
TIMP1	1.07612	8.42538	8.53122	0	1
COL1A2	1.0757	6.84676	6.95204	0	1
DAXX	1.0756	6.38891	6.49405	0	1
ARHGEF12	1.07511	7.2037	7.30819	0	1
COL20A1	1.07488	6.85936	6.96354	0	1
STK24	1.07447	6.72812	6.83175	1.58496	1
CAGE1	1.07421	6.49769	6.60097	0	1
EPHB1	1.07379	7.11716	7.21988	0	1
CDH18	1.07312	7.12762	7.22943	0	1
PARK7	1.07301	7.71431	7.81598	1	1
DNM2	1.07286	6.67921	6.78067	0	1
POLR3H	1.07241	6.6863	6.78716	1	1
CBLN2	1.07097	6.92076	7.01968	0	1
ULK3	1.07061	6.85936	6.9578	0	1
THRA	1.07035	8.51571	8.61379	1	1
TPRA1	1.06982	6.80178	6.89915	0	1
TSHB	1.0689	6.07996	6.17608	0	1
RAB6A	1.06836	6.5913	6.6867	1	1
MST1R	1.06824	6.50573	6.60097	0	1
CXADR	1.06772	6.97388	7.06841	1.58496	1
TADA2A	1.06748	6.84042	6.93463	0	1
DNAJB4	1.06724	6.91474	7.00863	0	1
CNGA2	1.06582	7.35372	7.44569	0	1
MAP3K1	1.06577	6.79523	6.88713	0	1
GPRIN2	1.06494	9.39433	9.48511	0	1
FKBPL	1.06483	8.34479	8.43541	0	1
DDIT3	1.06482	7.5177	7.60831	0	1
USP30	1.06366	6.58373	6.67276	0	1
CDH24	1.06292	11.8012	11.8892	0	1
UBA2	1.06279	6.6863	6.77416	0	1
CDC25C	1.06279	6.50573	6.59359	0	1
TNNI3K	1.06199	7.25705	7.34381	1	1
MMP15	1.06161	6.70736	6.79361	0	1
ALDOC	1.06161	6.70736	6.79361	0	1
FAS	1.06118	7.48555	7.57122	0	1
ABHD14B	1.06102	6.53744	6.62288	0	1
SERINC2	1.05998	7.04178	7.12581	0	1
EP300	1.05998	6.45682	6.54085	1.58496	1
B2M	1.05992	6.6505	6.73445	0	1
TAF4	1.05908	6.4733	6.55611	0	1
CDH8	1.05897	6.75534	6.83801	0	1
LAMA4	1.05824	7.26654	7.3482	0	1
MATK	1.05787	6.38891	6.47007	0	1
LPL	1.05749	6.86562	6.94626	0	1
MARK1	1.05519	6.44014	6.51764	0	1
HMG20B	1.05516	6.82765	6.90512	0	1
SPTBN1	1.05453	7.07457	7.15117	2.5025	1
TFAP2A	1.05451	6.84042	6.917	0	1
PFKFB2	1.05439	6.75534	6.83175	1.58496	1
CHKB	1.05318	7.10134	7.17608	0	1
MINK1	1.05272	6.78866	6.86278	0	1
SLC6A6	1.05231	6.88424	6.9578	0	1
LHB	1.05229	6.49769	6.57122	0	1
ARHGAP9	1.0522	6.60633	6.67975	0	1
DOK3	1.05201	6.89039	6.96354	0	1
SERPINB7	1.0518	7.26654	7.33941	0	1
MMP17	1.05171	6.89652	6.96925	0	1
H2AFZ	1.05157	7.27126	7.34381	0	1
TGFBR3	1.05078	8.31994	8.3914	0	1
CDCA3	1.05059	7.07996	7.15117	0	1
IL2	1.05006	6.6505	6.72097	0	1
ZADH2	1.04722	6.99115	7.05772	0	1
GPRIN1	1.04722	6.99115	7.05772	0	1
GSK3B	1.04684	6.37143	6.43747	1.58496	1
RAB18	1.04564	6.93869	7.00307	0	1
NKX3-1	1.04502	6.53744	6.60097	0	1
NKX3-1	1.04268	7.5913	7.65159	0	1
ELOVL5	1.0421	6.92676	6.98626	0	1
ARHGAP17	1.04148	6.73497	6.79361	0	1
POLR3D	1.0412	6.74179	6.80004	0	1
TAF15	1.04102	6.85308	6.91107	0	1
GSK3A	1.04066	6.51372	6.57122	0	1
XRCC5	1.03875	6.6863	6.74115	0	1
RDX	1.03852	7.01387	7.06841	1	1
CREBBP	1.03781	8.95785	9.0114	1.58496	1
ABHD12	1.03772	6.82765	6.88108	0	1
DNM1	1.03423	6.38891	6.43747	1	1
S100A10	1.03423	6.38891	6.43747	1	1
BCL10	1.03382	7.31765	7.36564	0	1
CLDN1	1.03315	10.3039	10.3509	0	1
TGFBR2	1.03285	7.25705	7.30367	0	1
ARHGAP22	1.03214	6.59884	6.64447	0	1
SLC9A7	1.0321	7.08534	7.13092	0	1
HSPE1	1.03143	7.38456	7.4292	0	1
KCNA1	1.02868	8.37801	8.4188	0	1
RASSF6	1.02858	6.84042	6.88108	0	1
USP19	1.02796	6.85936	6.89915	0	1
COL19A1	1.02692	7.13281	7.17113	0	1
SLC30A4	1.02685	7.0195	7.05772	0	1
EGF	1.02632	6.6212	6.65868	0	1
KIT	1.02582	6.92676	6.96354	0	1
TGFB2	1.02517	8.1888	8.22466	1.58496	1
PECAM1	1.02484	6.82123	6.85662	0	1
MAPK1	1.02475	12.2704	12.3056	0	1
RARB	1.02334	8.24989	8.28317	0	1
NOTCH2	1.02255	7.03624	7.06841	0	1
RAB3GAP1	1.02245	7.28066	7.31269	1.58496	1
ITGAV	1.02244	6.90262	6.93463	0	1
ABHD4	1.02223	7.0473	7.07902	0	1
CTSD	1.02213	6.5913	6.62288	1	1
RAB29	1.02211	6.76207	6.79361	0	1
DCTN2	1.0215	6.61379	6.64447	0	1
POLDIP3	1.01977	6.84676	6.875	0	1
PTK2	1.01896	6.70736	6.73445	0	1
USP53	1.01863	7.04178	7.06841	0	1
TNFSF12	1.01838	7.1888	7.21508	0	1
AKT2	1.01738	6.76876	6.79361	1	1
COX17	1.01664	6.96807	6.99188	0	1
NFE2L2	1.01624	6.81477	6.83801	0	1
SLK	1.01468	6.46508	6.4861	0	1
GAS6	1.01458	6.88424	6.90512	0	1
EPN2	1.01402	6.90869	6.92877	0	1
MMP11	1.01205	7.45682	7.4741	0	1
CUL1	1.01176	10.9883	11.0052	1	1
DKC1	1.01158	7.0195	7.03611	0	1
KAT2B	1.01116	6.84676	6.86278	0	1
CHUK	1.01095	6.37143	6.38714	0	1
MAP3K10	1.01064	6.87185	6.88713	0.584963	1
XRCC5	1.01014	6.89652	6.91107	0	1
CDK5R2	1.01002	6.90262	6.917	1.58496	1
CREBZF	1.00934	6.71431	6.72773	1	1
IGF1R	1.0086	6.48961	6.50196	1	1
LAMB3	1.00804	7.36702	7.37858	0	1
PIAS3	1.00792	6.78866	6.80004	0	1
REV3L	1.00744	6.81477	6.82546	0	1
AASDHPPT	1.00709	6.83405	6.84424	0	1
FMN2	1.00652	6.86562	6.875	0	1
GNL3L	1.00474	6.70736	6.71418	0	1
RASSF2	1.00392	8.52365	8.52929	0	1
GRTP1	1.00277	10.3177	10.3216	0	1
EPCAM	1.0026	6.52167	6.52542	0	1
URB1	1.00209	6.87806	6.88108	0	1
BAK1	1.00066	6.65773	6.65868	0	1
MAP4K4	1.00005	7.0251	7.02518	1	1
SLC30A1	0.998103	6.85936	6.85662	0	1
CDC6	0.997124	7.26654	7.26238	0	1
CTSC	0.996864	7.29	7.28547	0	1
MARCH5	0.996801	6.97388	6.96925	1.58496	1
MAP3K6	0.995191	6.71431	6.70736	0	1
BRI3BP	0.994064	6.83405	6.82546	0	1
ADNP	0.99395	7.2618	7.25305	1	1
CDC7	0.992448	7.0251	7.01416	1	1
ALDH1B1	0.992405	7.03068	7.01968	0	1
PARP3	0.991705	6.53744	6.52542	0	1
KRT10	0.991225	7.1888	7.17608	0	1
HCK	0.990267	7.33129	7.31718	0	1
PSEN1	0.989723	6.83405	6.81915	0	1
COX19	0.988889	6.97966	6.96354	0	1
WNT5A	0.985898	6.67208	6.65159	0	1
MMP3	0.985401	6.82765	6.80644	0	1
LAMA3	0.985163	6.90869	6.88713	0	1
HMGB2	0.984675	7.09069	7.06841	0	1
PARP1	0.982785	9.14958	9.12453	0	1
FRK	0.981041	6.99687	6.96925	0	1
MDM2	0.981041	6.90262	6.875	1	1
Bad	0.981041	6.76876	6.74115	0	1
NGFR	0.981041	6.58373	6.55611	1	1
STAG3	0.981041	7.16869	7.14108	0	1
CDKL3	0.981041	6.70736	6.67975	0	1
CTSZ	0.977574	7.15853	7.12581	0	1
LDLRAD3	0.977381	7.07996	7.04695	0.584963	1
MAP2K4	0.977069	6.96224	6.92877	0	1
DNAL4	0.976681	6.82765	6.79361	0	1
ALDOB	0.976602	6.80178	6.76762	0	1
SORL1	0.973039	8.27362	8.23419	0	1
SND1	0.972405	9.16362	9.12325	1	1
E2F4	0.971999	6.77542	6.73445	0	1
CD55	0.971231	7.65773	7.61562	0	1
MAP3K3	0.970786	7.17878	7.13601	1.58496	1
SRPK1	0.969943	7.80178	7.75775	1	1
SOD1	0.969499	7.00823	6.96354	0.584963	1
RAB34	0.969174	6.96807	6.9229	0	1
SP3	0.968816	9.3403	9.2946	0	1
MCM5	0.968189	6.85308	6.80644	0	1
DNAJB11	0.968133	6.84676	6.80004	0	1
YWHAG	0.967902	6.82123	6.77416	3	1
S100A6	0.967224	6.74858	6.7005	0	1
ADCK5	0.967026	6.72812	6.67975	0	1
HDAC5	0.966507	8.67565	8.6265	0	1
TUBB3	0.966219	9.06236	9.01278	2.5025	1
CDCP1	0.965746	7.82445	7.77416	0	1
HTR1F	0.964892	6.93869	6.88713	0	1
TXNRD2	0.964497	8.22576	8.17361	1	1
AURKB	0.96383	6.43173	6.37858	0	1
TGFB1	0.959361	6.51372	6.45386	0	1
COX15	0.958946	6.80829	6.74781	0	1
USP24	0.955993	6.89039	6.82546	0	1
MUTYH	0.955967	7.30389	7.23892	0	1
TGFA	0.955435	8.27362	8.20785	0	1
NREP	0.952922	7.30849	7.23892	1	1
ITGA5	0.952781	6.93869	6.8689	0	1
CPNE8	0.951009	7.21355	7.14108	1.32193	1
SEPT8	0.950142	7.00256	6.92877	0	1
TRAF3IP1	0.949826	6.79523	6.72097	0	1
MCL1	0.948556	6.25228	6.17608	0	1
PARK7	0.94852	6.51372	6.43747	1	1
SIK3	0.948475	6.92676	6.85044	0	1
CDK1	0.948461	7.09602	7.01968	0	1
MLH3	0.94834	7.09069	7.01416	0	1
HSP90AA1	0.948147	12.1459	12.0691	3.58496	1
TFDP1	0.945905	11.0651	10.9848	1	1
COL3A1	0.943563	7.81153	7.72773	0	1
MAPK10	0.940406	7.99972	7.91107	0	1
ZHX2	0.936949	7.07457	6.98061	0	1
ERBB3	0.935775	9.23304	9.13728	0	1
RPS27	0.935762	8.03624	7.94046	1	1
PRKDC	0.934874	7.74519	7.64804	0	1
POLI	0.934005	7.2037	7.1052	0	1
Casp9	0.933917	6.85308	6.75444	0	1
NOTCH2	0.933762	6.97388	6.875	0	1
ERN1	0.933107	9.5979	9.49801	0	1
G3BP2	0.932793	6.94461	6.84424	1.58496	1
NCK2	0.931765	6.78866	6.6867	0	1
EIF4G2	0.931097	7.11716	7.01416	1.58496	1
LIMK2	0.930988	9.53547	9.43231	1.58496	1
CDKL2	0.929767	7.17878	7.07372	1	1
RTN3	0.929577	7.26654	7.16118	1	1
LRP10	0.928818	7.05279	6.94626	1	1
SLC25A21	0.928012	6.80829	6.7005	0	1
CHST10	0.927679	6.91474	6.80644	0	1
MAP3K21	0.927263	8.24749	8.13854	0	1
TK1	0.926029	6.75534	6.64447	0	1
CDH1	0.923494	7.49769	7.38286	0	1
HSPA5	0.922548	8.91474	8.79844	0.584963	1
CASP9	0.921538	8.34255	8.22466	0	1
NOL3	0.918903	12.0002	11.8782	1	1
FGF2	0.915638	6.3802	6.25305	0	1
DFFA	0.914455	6.80178	6.67276	0	1
TUBA1A	0.91441	12.3997	12.2706	1	1
HIST1H2BH	0.913992	7.13281	7.00307	0	1
TIMP3	0.912175	11.0011	10.8685	0	1
SHPK	0.911587	6.83405	6.7005	0	1
S100A16	0.911464	7.15342	7.01968	0	1
CASP2	0.911365	7.4733	7.33941	0	1
PIP5K1C	0.910335	8.80829	8.67276	1	1
ZNHIT6	0.910208	7.12762	6.99188	0	1
SIRPA	0.909154	6.87185	6.73445	0	1
PARP1	0.909132	6.5913	6.45386	0	1
CNTN4	0.908033	6.76207	6.62288	1	1
ACTA1	0.907334	13.3086	13.1683	0	1
SLC5A3	0.906779	6.98542	6.84424	1	1
CUL2	0.906421	8.818	8.67626	0	1
CYB561D1	0.905696	12.4831	12.3402	0	1
SAR1B	0.905576	7.23787	7.09478	0	1
CLDN11	0.905287	10.0397	9.89615	0	1
TNFRSF1B	0.902107	10.0418	9.89315	0	1
ADAM17	0.896581	7.25228	7.09478	0	1
APLP2	0.895247	8.05279	7.89315	2.32193	1
BLCAP	0.895032	7.52563	7.36564	0	1
STAT5A	0.894761	7.27597	7.11554	0	1
VIM	0.894682	7.16362	7.00307	1.58496	1
TYRO3	0.894159	7.09602	6.93463	0	1
ABCD1	0.893921	10.8558	10.694	0	1
RXRG	0.89376	7.1483	6.98626	0	1
SENP2	0.892475	7.76876	7.60464	0	1
CDYL2	0.891856	8.20123	8.03611	0	1
EFNB3	0.890328	7.2037	7.03611	0	1
IKBKB	0.889781	6.76207	6.59359	0	1
RBM5	0.888552	7.22819	7.05772	0	1
GRK3	0.887773	7.16362	6.99188	0	1
ME1	0.882176	7.0251	6.84424	0	1
MAPK3	0.882176	7.61006	7.4292	0	1
ARHGEF3	0.881994	6.71431	6.53315	1.58496	1
TUBGCP5	0.881153	7.11716	6.93463	1	1
PTGER4	0.879554	6.87185	6.6867	0	1
USF2	0.878112	7.26654	7.07902	0	1
HDAC6	0.874406	7.34479	7.15117	0	1
MLX	0.87353	7.52563	7.33055	0	1
GNPAT	0.872182	8.56077	8.36347	0	1
ALDH3B1	0.872037	6.70736	6.50982	0	1
YWHAH	0.871644	7.13281	6.93463	2	1
HTR3A	0.871195	7.03068	6.83175	0	1
JUP	0.871042	8.59696	8.39777	1.58496	1
FBLN5	0.868783	6.66492	6.46199	0	1
CD3E	0.868783	6.66492	6.46199	0	1
VEGFB	0.868073	8.3802	8.17608	1	1
S100A3	0.866335	7.35817	7.15117	0	1
EFNA5	0.864071	7.03624	6.82546	1	1
NOX3	0.863316	6.97966	6.76762	0	1
SLC39A1	0.862127	7.5177	7.30367	0	1
XRCC3	0.861838	7.69862	7.48411	0	1
XRCC3	0.861838	7.69862	7.48411	0	1
NTRK1	0.860188	7.1224	6.90512	2.80735	1
HDAC7	0.859675	7.19875	6.98061	0	1
FGF22	0.859544	12.0579	11.8396	0	1
CDH1	0.859496	7.41901	7.20058	0	1
RAB20	0.856968	7.42326	7.20058	0	1
TUBGCP6	0.85471	7.97098	7.74448	0	1
ME3	0.854323	6.92076	6.69362	1	1
FGF1	0.853371	6.2037	5.97494	0	1
USP32	0.852571	6.99115	6.76105	0	1
TUBGCP3	0.852279	8.92076	8.69016	0	1
NOTCH2	0.85	7.12762	6.89315	0	1
CALR	0.849582	7.97966	7.74448	1	1
HDAC10	0.847263	7.05827	6.81915	0	1
HSD17B10	0.844943	8.03346	7.79039	0	1
PTPN11	0.843351	7.43173	7.18593	0	1
CCNL1	0.842803	6.79523	6.5485	0	1
AATF	0.842416	7.53744	7.29004	0	1
SEPT1	0.840446	7.30849	7.05772	0	1
HTR2C	0.838208	7.04178	6.78716	0	1
FLT1	0.835211	6.80829	6.5485	0	1
CYP7B1	0.834929	7.15342	6.89315	0	1
SRA1	0.833885	6.79523	6.53315	0	1
CDH2	0.833393	7.23787	6.97494	1.80735	1
LGALS3	0.83225	8.24269	7.97778	0	1
ATRX	0.830381	7.14316	6.875	1.41504	1
GPRIN3	0.830381	7.14316	6.875	0	1
MCM2	0.827608	6.73497	6.46199	0	1
POU2F1	0.826753	7.41048	7.13601	0	1
SLC5A6	0.82643	8.07187	7.79683	0	1
CD80	0.824098	9.74009	9.46098	0	1
CCNG1	0.823988	8.84676	8.56746	1	1
ERCC1	0.82348	8.3802	8.1	0	1
RAB37	0.820374	7.66851	7.38286	0	1
PPHLN1	0.817534	7.35372	7.06307	0	1
ADRA2A	0.812371	7.16869	6.8689	0	1
RPS6KB1	0.810004	7.2618	6.9578	1	1
CYP2S1	0.809654	7.38891	7.08429	0	1
ICAM1	0.808451	6.76876	6.46199	0	1
RAD50	0.808394	7.92975	7.62288	0	1
PROZ	0.808108	8.83086	8.52348	0	1
LYN	0.805855	6.99115	6.67975	0	1
TBP	0.805396	6.85308	6.54085	1	1
PYCARD	0.804716	8.04454	7.73109	0	1
CSF1	0.801414	8.48555	8.16617	0	1
TGFB3	0.800416	7.12762	6.80644	0	1
COX4I1	0.799846	7.57993	7.25772	0	1
PHLDA1	0.795939	7.32676	6.99749	1	1
ACTB	0.794624	11.473	11.1414	2.60572	1
RBM26	0.794463	7.3626	7.03065	0	1
PCNA	0.792704	7.46096	7.12581	0	1
COL4A1	0.791026	10.8699	10.5317	0	1
ELOVL4	0.790917	7.0251	6.6867	0	1
CCNF	0.790819	9.54037	9.20179	0	1
TNF	0.785702	11.0803	10.7324	0	1
SERINC3	0.785485	7.24749	6.89915	0	1
TPD52	0.778765	8.19875	7.83801	1	1
LMNA	0.778385	8.33355	7.9721	0	1
HMGB1	0.778371	7.39758	7.03611	0.584963	1
ENO2	0.777959	7.30849	6.94626	1.58496	1
CANX	0.777733	7.2618	6.89915	2.58496	Closed Blue
YES1	0.774506	6.96224	6.59359	0	Blue
MMP14	0.773251	7.1838	6.81281	0	Blue
ADPGK	0.770615	7.44433	7.06841	0	Blue
THRB	0.770025	7.06372	6.6867	0	Blue
POLQ	0.76901	7.29	6.91107	0	Blue
COL4A4	0.768482	7.24269	6.86278	0	Blue
MLH1	0.763581	7.64687	7.25772	0	Blue
MMP15	0.761405	7.40189	7.00863	0	Blue
TAF1A	0.760936	7.29928	6.90512	0	Blue
TYK2	0.760929	9.83883	9.44467	0	Blue
CHST8	0.76012	7.0473	6.65159	0	Blue
UBTD1	0.759383	7.91474	7.51764	0	Blue
IP6K2	0.759086	6.80178	6.40411	0	Blue
CLK2	0.758672	7.24269	6.84424	0	Blue
SMAD1	0.757351	7.27597	6.875	0	Blue
FTH1	0.754418	8.37582	7.96925	0	Blue
LCK	0.752726	7.11716	6.70736	0	Blue
EFNA4	0.751622	7.82445	7.41252	0	Blue
MMP3	0.748689	7.58373	7.16617	0	Blue
AKT1	0.7481	8.37362	7.95493	0	Blue
SEPT3	0.747764	7.27597	6.85662	1	Blue
COL4A5	0.747002	7.27126	6.85044	0	Blue
INPP5D	0.746538	7.84676	7.42505	0	Blue
PDGFB	0.746217	8.15342	7.73109	0	Blue
BUB3	0.746144	7.16362	6.74115	0	Blue
HDAC3	0.745975	7.68983	7.26703	1	Blue
SKP2	0.745591	7.24269	6.81915	0	Blue
IL1A	0.744962	6.56077	6.13601	0	Blue
PNCK	0.743778	7.53744	7.11038	0	Blue
MTA1	0.743461	7.91776	7.49008	1.58496	Closed Blue
SMAD4	0.743213	7.05827	6.63012	0	Blue
PML	0.740912	7.91474	7.48211	0	Blue
CSNK1G1	0.737038	7.6212	7.18102	1	Blue
MUM1	0.734607	7.72123	7.27628	0	Blue
GPR150	0.73048	8.0054	7.55231	0	Blue
BACH1	0.729921	7.20863	6.75444	0	Blue
STAT5A	0.729492	7.75871	7.30367	0	Blue
AKIP1	0.729293	7.57612	7.12069	0	Blue
USP42	0.729031	7.36702	6.91107	1	Blue
UBA5	0.721354	7.6863	7.21508	0	Blue
UBAC1	0.720165	7.07457	6.60097	0	Blue
PIAS4	0.719817	7.41475	6.94046	0	Blue
POLA1	0.714624	7.30389	6.81915	0	Blue
HTR5A	0.714091	7.79851	7.31269	0	Blue
SENP1	0.71245	7.76542	7.27628	0	Blue
CDKN1C	0.710814	7.39758	6.90512	0	Blue
GPR160	0.709877	7.81153	7.31718	0	Blue
TUBB3	0.70707	10.4259	9.92584	2.5025	Closed Blue
SPP1	0.705983	7.75534	7.25305	0	Blue
PLA2G4C	0.705607	7.32221	6.81915	2.80735	Closed Blue
MMP19	0.704337	7.88424	7.37858	0	Blue
CSNK1G2	0.697056	7.2618	6.74115	0	Blue
FGF18	0.696323	7.32221	6.80004	0	Blue
COQ8A	0.692826	7.48148	6.95204	1.58496	Closed Blue
TUSC3	0.69083	7.29464	6.76105	0	Blue
MGMT	0.690751	8.14573	7.61197	0	Blue
HIPK4	0.690565	7.49769	6.96354	0	Blue
EPHB6	0.687283	7.48148	6.94046	0	Blue
SEPT7	0.687059	7.22819	6.6867	1.32193	Closed Blue
STEAP3	0.687029	7.36702	6.82546	0	Blue
PARP1	0.685327	8.46508	7.91995	0	Blue
COL4A2	0.684987	7.41475	6.8689	0	Blue
ADH7	0.683652	7.17878	6.63012	0	Blue
DGKK	0.680155	7.61379	7.05772	0	Blue
ITPKC	0.678139	8.36039	7.80004	0	Blue
PLA2G4E	0.677132	7.53744	6.97494	0	Blue
TAF5L	0.677119	7.79195	7.22943	0	Blue
JAK3	0.675589	7.10663	6.54085	0	Blue
ZMYND8	0.672985	7.70736	7.13601	1	Blue
ANXA6	0.671489	7.70037	7.12581	1	Blue
LRP11	0.670931	7.98829	7.41252	0	Blue
DMGDH	0.668973	8.10927	7.52929	0	Blue
ATP2C1	0.666269	7.56077	6.97494	0	Blue
MSTN	0.665425	9.55691	8.96925	0	Blue
HTR4	0.665276	7.68276	7.09478	0	Blue
GRID2	0.662069	7.52957	6.93463	0.584963	Blue
PRPF19	0.661195	7.52563	6.92877	0	Blue
CASP9	0.660912	8.16869	7.57122	0	Blue
MMP16	0.659523	7.49365	6.89315	1	Blue
DLEC1	0.656432	7.6863	7.07902	0	Blue
SLC22A18	0.655504	7.80504	7.19571	0	Blue
PTGR2	0.653146	7.54915	6.93463	0	Blue
UCHL1	0.650639	7.60633	6.98626	0	Blue
F2R	0.65018	9.59319	8.9721	0	Blue
PKM	0.648816	6.98542	6.3613	1.58496	Closed Blue
CUL3	0.642928	7.59507	6.9578	1	Blue
JAK2	0.642633	7.17878	6.54085	0	Blue
PLA1A	0.640742	7.3358	6.69362	0	Blue
RHOBTB3	0.638578	7.58752	6.94046	1	Blue
MDFI	0.638391	7.92377	7.27628	0	Blue
ANGPT1	0.635558	7.24749	6.59359	0	Blue
COP1	0.633935	7.89652	7.23892	0	Blue
NEGR1	0.629347	7.91172	7.24365	1	Blue
LAMP3	0.621862	7.52957	6.84424	0	Blue
COL3A1	0.620566	7.76207	7.07372	0	Blue
NOS3	0.619605	7.34926	6.65868	0	Blue
RAB40B	0.619146	8.41262	7.72097	0	Blue
SEPT2	0.618156	7.62858	6.93463	0	Blue
CHST2	0.617943	7.77874	7.08429	0	Blue
CSE1L	0.616962	8.10927	7.41252	0	Blue
MAST4	0.616867	7.64323	6.94626	1	Blue
LRP3	0.616191	7.5177	6.81915	0	Blue
NR2F2	0.615313	7.64687	6.94626	1.58496	Closed Blue
MCM3AP	0.614593	7.42326	6.72097	0	Blue
AKT3	0.613963	7.25228	6.5485	1	Blue
NSG1	0.611313	7.88115	7.17113	1	Blue
PRKAR1A	0.608848	7.84676	7.13092	0	Blue
CDH20	0.606758	7.73497	7.01416	0	Blue
RAD51B	0.605709	7.57993	6.85662	0	Blue
CD14	0.604106	8.20123	7.4741	0	Blue
ANGPT2	0.603963	7.27597	6.5485	0	Blue
ARHGEF2	0.60264	7.72812	6.99749	0	Blue
CIB2	0.601076	7.84992	7.11554	0	Blue
HOXB2	0.599917	7.71778	6.98061	0	Blue
FN1	0.599706	7.24749	6.50982	0	Blue
ITGA5	0.599339	7.20863	6.47007	0	Blue
COL1A2	0.598773	8.19378	7.45386	0	Blue
CD38	0.598406	7.4275	6.6867	0	Blue
AIG1	0.594411	7.55691	6.80644	0	Blue
CAMKV	0.593714	7.45267	6.7005	0	Blue
PDGFRA	0.592955	8.216	7.46199	0	Blue
ATP5S	0.592178	7.97098	7.21508	0	Blue
UBFD1	0.592008	7.19378	6.43747	1.58496	Closed Blue
FRS3	0.591868	7.5177	6.76105	0	Blue
JAK1	0.591739	7.57612	6.81915	1	Blue
IL10	0.591739	7.79851	7.04154	0	Blue
ARHGEF9	0.591598	7.3802	6.62288	0	Blue
SENP3	0.589628	7.6249	6.86278	0	Blue
F2R	0.58952	8.79031	8.02792	0	Blue
F13A1	0.588625	7.58373	6.81915	0	Blue
GABRG1	0.588625	7.87496	7.11038	0	Blue
MOK	0.587665	7.68983	6.9229	0	Blue
KRT7	0.586369	7.45682	6.6867	0	Blue
LGALS4	0.585114	7.98829	7.21508	0	Blue
ITPKA	0.581282	7.92377	7.14108	0	Blue
TNFSF13	0.580906	7.92975	7.14613	0	Blue
BRMS1	0.577509	7.67921	6.88713	0	Blue
SHD	0.575924	7.82123	7.02518	0	Blue
SESN1	0.567855	7.80829	6.99188	1.58496	Closed Blue
BAX	0.557498	10.3211	9.47811	0	Blue
C3AR1	0.55741	7.64323	6.80004	0	Blue
GPR153	0.556208	8.18129	7.33499	0	Blue
SLC4A10	0.555556	7.81153	6.96354	0	Blue
CDK2AP2	0.549477	7.71431	6.85044	0	Blue
MUC16	0.542704	7.15342	6.27166	0	Blue
VCAM1	0.542248	7.11716	6.23419	0	Blue
POU2F2	0.535113	7.68276	6.78067	1	Blue
PDK2	0.532683	7.91172	7.00307	0	Blue
GGH	0.531759	7.83405	6.9229	0	Blue
TSHZ2	0.531553	8.05279	7.14108	2.80735	Closed Blue
ABCC12	0.530012	7.89652	6.98061	0	Blue
PHKA1	0.527412	7.50171	6.57872	0	Blue
SHC3	0.523907	7.5913	6.65868	0	Blue
USP36	0.506423	7.66133	6.67975	0	Blue
PKIA	0.498765	7.90869	6.90512	0	Blue
DDX4	0.491843	7.54915	6.52542	0	Blue
CASP7	0.489625	11.6964	10.6662	0	Blue
PTGS2	0.480121	8.15853	7.1	0	Blue
RPS6KA6	0.477943	7.88424	6.81915	0	Blue
SHC2	0.477167	8.11978	7.05235	1.58496	Closed Blue
SNCA	0.466657	7.54525	6.44569	1	Blue
IL13RA1	0.461666	7.42326	6.30819	0	Blue
LGALS9	0.454256	8.0195	6.88108	0	Blue
BMX	0.453661	7.4485	6.30819	0	Blue
FAM84B	0.439095	7.96807	6.78067	0	Blue
TUBGCP4	0.437805	8.11454	6.9229	0	Blue
TUSC2	0.435649	8.21844	7.01968	0	Blue
AMPD1	0.393763	8.20123	6.85662	0	Blue
EMCN	0.354709	8.27597	6.78067	0	Blue
